# Supplementary material for: Hydrogen-bond mediated regio- and enantioselectivity in a C–H amination reaction catalysed by a supramolecular Rh(ii) complex
Source: Royal Society of Chemistry journal article supplement (doi:10.1039/c3cc44197k), 2013-01-01
Supplement: c3cc44197k.pdf [file c3cc44197k.pdf]

=====

ELECTRONIC SUPPORTING INFORMATION

=====

BELONGING TO THE PAPER

**Hydrogen-bond mediated regio- and enantioselectivity in a C–H amination reaction  
catalysed by a supramolecular Rh(II) complex**

Thorsten Höke, Eberhardt Herdtweck and Thorsten Bach\*

|                                             |     |
|---------------------------------------------|-----|
| 1. Synthetic procedures and analytical data | S2  |
| 2. NMR spectra of new compounds             | S38 |
| 3. HPLC traces of chiral products           | S66 |
| 4. Crystallographic data                    | S76 |
| 5. References                               | S85 |

## 1. Synthetic procedures and analytical data

### General information

All reactions, sensitive to air or moisture, were carried out in flame-dried glassware under positive pressure of argon using standard techniques. Dry tetrahydrofuran (THF), dichloromethane ( $\text{CH}_2\text{Cl}_2$ ) and diethyl ether ( $\text{Et}_2\text{O}$ ) were obtained from an MBraun MB-SPS 800 solvent purification system. Other dry solvents were obtained from Fluka and Acros in the highest purity available and used without further purification. All solvents for chromatography were distilled prior to use. TLC was performed on silica coated glass plates (silica gel 60 F254) with detection by UV (254 nm),  $\text{KMnO}_4$  or ceric ammonium molybdate (CAM) with subsequent heating. Flash chromatography was performed on silica gel 60 (Merck, 230-400 mesh) with the indicated eluent. HPLC analyses were performed using a chiral stationary phase (ChiralPak AD-H, ChiralCell OD or ChiralPak AS-RH, UV detection; Daicel Chemical Industries) employing *n*-hexane/*i*-PrOH (AD-H, OD) or acetonitrile/water (AS-RH) as eluents. For the separation of enantiomers, semipreparative HPLC with a chiral stationary phase (Daicel ChiralPak AD, 250 × 20 mm) was used. IR-spectra were recorded on a JASCO IR-4100 (ATR), MS/HRMS-measurements were performed on a Finnigan MAT 8200 (EI), a Finnigan MAT 95S (HR-EI), a Finnigan LCQ classic (ESI), a Thermo Scientific LTQ Orbitrap XL (HRMS-ESI) or a Thermo Scientific LTQ\_FT ultra (HRMS-ESI).  $^1\text{H}$ - and  $^{13}\text{C}$ -NMR-spectra were recorded in the stated solvent at 300 K on a Bruker AV-250, a Bruker AV-360 or a Bruker AV-500 spectrometer. Chemical shifts are reported in  $\delta$  units relative to the residual non-deuterated solvent [ $\text{CHCl}_3$ :  $\delta$  ( $^1\text{H}$ ) = 7.26 ppm,  $\delta$  ( $^{13}\text{C}$ ) = 77.16 ppm,  $\text{DMSO-}d_6$ :  $\delta$  ( $^1\text{H}$ ) = 2.50 ppm,  $\delta$  ( $^{13}\text{C}$ ) = 39.52 ppm; THF- $d_8$ :  $\delta$  ( $^1\text{H}$ ) = 1.73 ppm, 3.58 ppm;  $\delta$  ( $^{13}\text{C}$ ) = 25.30 ppm] or TMS [ $\delta$  ( $^1\text{H}$ ) = 0.00 ppm]. Apparent multiplets which occur as a result of coincidental equality of coupling constants to those of magnetically non-equivalent protons are marked as virtual (*virt.*). The multiplicity of the  $^{13}\text{C}$ -NMR signals were determined by DEPT experiments and assignments are based on two-dimensional NMR spectroscopy (COSY, NOESY, HSQC, HMBC). Melting points were measured on a Büchi 510 and are not corrected. Specific rotations were measured using a Perkin-Elmer 241 MC (sodium vapor lamp or mercury lamp).

## General procedures

### *General procedure 1 (GP1): Grignard addition to aldehydes*

Magnesium turnings (2.5 eq) were suspended in a small amount of THF and approx. 1/3 of the corresponding neat aryl bromide (2.5 eq) was added. The mixture was stirred until the solution became turbid and heat evolution was observed (in case of no reaction one or two drops of 1,2-dibromoethane were added). A solution of remaining aryl bromide in THF (1.0 M, total Grignard concentration) was added over 10 minutes. The reaction mixture was heated at reflux for one hour, then was cooled to room temperature and added to a suspension of aldehyde **S1**<sup>[5]</sup> (1.0 eq) in THF (0.4 M) at 0 °C. After heating at reflux for two hours the reaction was quenched by addition of saturated NH<sub>4</sub>Cl solution/water (3/1). The organic layer was separated and the aqueous layer was extracted with dichloromethane (3 × ~16 mL/mmol aldehyde). The combined organic layers were dried over Na<sub>2</sub>SO<sub>4</sub> and the solvent was removed under reduced pressure. The residue was redissolved in dichloromethane/methanol, loaded onto Celite and subjected to flash column chromatography.

### *General procedure 2 (GP2): Dehydroxylation of quinolones*

To a suspension of the corresponding alcohol (1.0 eq) and triethylsilane (2.5 eq) in dichloromethane (0.2 M) was added trifluoroacetic acid (CH<sub>2</sub>Cl<sub>2</sub>/TFA = 2/1 or 5.0 eq TFA for substrate **S6a** respectively). The reaction mixture was stirred for 15-20 minutes at room temperature (40 minutes at 0 °C for substrate **S6a**) and then poured carefully into a saturated NaHCO<sub>3</sub> solution. The mixture was extracted with dichloromethane (3 × 20 mL/mmol quinolone) and the combined organic layers were dried over Na<sub>2</sub>SO<sub>4</sub>. After removal of the solvent under reduced pressure, the crude product was dissolved in dichloromethane/methanol, loaded onto Celite and subjected to flash column chromatography.

### *General procedure 3 (GP3): Synthesis of acid chlorides*

The corresponding carboxylic acid (1.0 eq) was treated with thionyl chloride (2.5 eq) and heated at reflux for two hours. Excess thionyl chloride was removed at room temperature under high vacuum to afford the acid chloride, which was used without further purification.

### *General procedure 4 (GP4): Rh-catalyzed CH-amination reactions using **6** or Rh<sub>2</sub>esp<sub>2</sub>*<sup>[1]</sup>

A flask was charged with 2,2,2-trichloroethyl sulfamate (22.8 mg, 0.1 mmol, 1.0 eq), catalyst **6** or Rh<sub>2</sub>esp<sub>2</sub> (2 μmol, 0.02 eq) and the corresponding quinolone (1.0 eq or 2.0 eq). The

mixture was dissolved in dry benzene (4 mL) and  $\text{PhI}(\text{OAc})_2$  was added (48.3 mg, 0.15 mmol, 1.5 eq) at room temperature in seven portions over the course of one hour (one portion every 10 minutes). The reaction was further stirred for 18 hours at room temperature. The solvent was removed under reduced pressure and the crude product subjected to flash column chromatography.

## Synthesis of the Rhodium-catalyst **6** and the substrates

### 1-Bromo-3,5-bis(bromomethyl)benzene (**2**)<sup>[2]</sup>

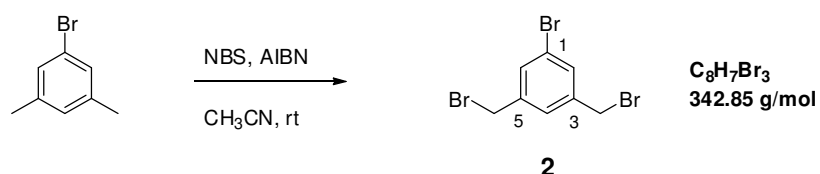

To a solution of 5-bromo-*m*-xylene (3.50 g, 18.9 mmol, 1.0 eq) and *N*-bromosuccinimide (7.07 g, 39.7 mmol, 2.1 eq) in acetonitrile (135 mL) was added azobisisobutyronitrile (62.1 mg, 0.378 mmol, 0.02 eq) and the reaction mixture heated at reflux for four hours. The solvent was then removed under reduced pressure. Carbon tetrachloride (60 mL) was added and the mixture was heated at reflux for 10 minutes. After cooling to room temperature, the solution was separated from insoluble succinimide by filtration. The solvent was removed under reduced pressure and the residue recrystallized twice from ethanol to afford the title compound as colorless needles (3.13 g, 48%).

**<sup>1</sup>H-NMR** (250 MHz,  $\text{CDCl}_3$ ):  $\delta$  [ppm] = 4.41 (s, 4 H,  $\text{CH}_2\text{Br}$ ), 7.32-7.36 (m, 1 H, 4-H), 7.47 (d,  $^4J = 1.5$  Hz, 2 H, 2-H, 6-H).

**<sup>13</sup>C-NMR** (90.6 MHz,  $\text{CDCl}_3$ ):  $\delta$  [ppm] = 31.6 (t,  $\text{CH}_2\text{Br}$ ), 122.8 (s, C-1), 128.4 (d, C-4), 132.1 (d, C-2, C-6), 140.4 (s, C-3, C-5).

The data obtained matched those reported in the literature.<sup>[2]</sup>

### Diethyl 3,3'-(5-bromo-1,3-phenylene)bis(2,2-dimethylpropanoate) (**3**)

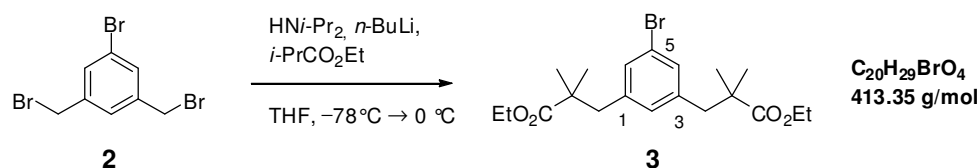

To a solution of diisopropylamine (0.35 mL, 2.50 mmol, 2.5 eq) in THF (2 mL) was added *n*-butyllithium (1.0 mL, 2.50 mmol, 2.5 eq, 2.5 M in *n*-hexane) at 0 °C dropwise. The solution was stirred at this temperature for 30 minutes after which it was cooled to −78 °C and a solution of ethyl isobutyrate (290 mg, 2.50 mmol, 2.5 eq) in THF (2 mL) was added over 10 minutes. The reaction mixture was allowed to warm to 0 °C, stirred for 10 minutes and then was quenched by addition of saturated NH<sub>4</sub>Cl solution (15 mL) and water (15 mL). The mixture was extracted with EtOAc (3 × 15 mL), the combined organic layers were dried over Na<sub>2</sub>SO<sub>4</sub> and the solvent was removed under reduced pressure. The crude product was subjected to flash column chromatography (SiO<sub>2</sub>, 17 × 2 cm, pentane/EtOAc 95/5, CAM) to afford ester **3** as a colorless solid (378 mg, 92%).

**m.p.:** 66-67 °C

**TLC:**  $R_f$  = 0.60 (pentane/EtOAc = 6/1) [CAM].

**IR** (ATR):  $\tilde{\nu}$  [cm<sup>−1</sup>] = 3015 (w, CH), 2927 (w, CH), 2870 (w, CH), 1721 (vs, C=O), 1567 (C=C), 1477 (w), 1386 (m), 1299 (m), 1188 (vs, C-O), 1131 (s), 1033 (m), 946 (w), 878 (m), 822 (m).

**<sup>1</sup>H-NMR** (500 MHz, CDCl<sub>3</sub>):  $\delta$  [ppm] = 1.16 (s, 12 H, C(CH<sub>3</sub>)<sub>2</sub>), 1.24 (t, <sup>3</sup> $J$  = 7.1 Hz, 6 H, OCH<sub>2</sub>CH<sub>3</sub>), 2.78 (s, 4 H, CH<sub>2</sub>Ar), 4.12 (q, <sup>3</sup> $J$  = 7.1 Hz, 4 H, OCH<sub>2</sub>CH<sub>3</sub>), 6.81 (s, 1 H, 2-H), 7.13 (s, 2 H, 4-H, 6-H).

**<sup>13</sup>C-NMR** (90.6 MHz, CDCl<sub>3</sub>):  $\delta$  [ppm] = 14.3 (q, OCH<sub>2</sub>CH<sub>3</sub>), 25.1 (q, C(CH<sub>3</sub>)<sub>2</sub>), 43.6 (s, C(CH<sub>3</sub>)<sub>2</sub>), 45.8 (t, CH<sub>2</sub>Ar), 60.7 (t, OCH<sub>2</sub>CH<sub>3</sub>), 121.7 (s, C-5), 131.1 (d, C-2), 131.2 (d, C-4, C-6), 139.9 (s, C-1), 177.2 (s, CO).

**MS** (EI, 70 eV):  $m/z$  (%) = 414 (35) [M<sup>+</sup> (<sup>81</sup>Br)], 412 (37) [M<sup>+</sup> (<sup>79</sup>Br)], 366 (6), 340 (96), 338 (100), 294 (63), 265 (40), 225 (87), 185 (63), 128 (42).

**HRMS** (EI): C<sub>20</sub>H<sub>29</sub><sup>79</sup>BrO<sub>4</sub> [M<sup>+</sup>]: calcd.: 412.1244; found: 412.1236.

**3,3'-(5-(((3a*S*,4*R*,7*S*,7a*R*,8*R*)-1-oxooctahydro-1*H*-4,7-methanoisindol-8-yl)ethynyl)-1,3-phenylene)bis(2,2-dimethylpropanoic acid) (5)**

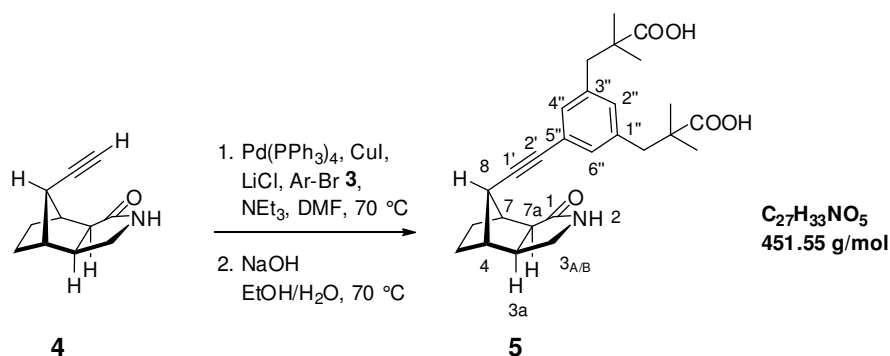

A mixture of alkyne **4**<sup>[3]</sup> (51.6 mg, 0.295 mmol, 1.0 eq), copper(I) iodide (5.6 mg, 29.4 μmol, 0.1 eq) and dry lithium chloride (74.9 mg, 1.77 mmol, 6 eq) in DMF (2.95 mL) and triethylamine (0.82 mL) was degassed by three *pump-freeze-thaw* cycles. Upon addition of Pd(PPh<sub>3</sub>)<sub>4</sub> (34.0 mg, 29.4 μmol, 0.1 eq) the reaction was stirred at 70 °C for 20 hours. Water (15 mL) was added and the mixture was extracted with EtOAc (3 × 10 mL). The combined organic layers were successively washed with water (10 mL) and saturated NaCl solution (10 mL) and dried over Na<sub>2</sub>SO<sub>4</sub>. The solvent was removed under reduced pressure and the residue was purified by flash column chromatography (SiO<sub>2</sub>, 9 × 2.5 cm, pentane/EtOAc 3/7, CAM). The coupling product was obtained as a colorless solid (134 mg, max. 0.263 mmol), containing inseparable phosphine-impurities. The compound was dissolved in ethanol (1.3 mL) and sodium hydroxide (52.6 mg, 1.32 mmol, 5 eq) and water were successively added until the sodium hydroxide was dissolved (0.5 mL). The reaction mixture was stirred at 70 °C for 18 hours. Water (20 mL) was added and the aqueous layer was washed with Et<sub>2</sub>O (2 × 6 mL), acidified (white precipitate) with HCl (3N) and extracted with Et<sub>2</sub>O (3 × 15 mL). The combined organic layers were dried over Na<sub>2</sub>SO<sub>4</sub>, the solvent was removed under reduced pressure and the residue subjected to flash column chromatography (SiO<sub>2</sub>, 11 × 2.5 cm, CH<sub>2</sub>Cl<sub>2</sub>/MeOH 99/1 + 1% AcOH, CAM) to afford the title compound as a colorless solid (97.7 mg, 73%).

**m.p.:** 177-179 °C

**TLC:** *R<sub>f</sub>* = 0.47 (CH<sub>2</sub>Cl<sub>2</sub>/MeOH = 9/1) [CAM].

**Specific Rotation:** [98% *ee*, based on enantiomeric purity of compound **4**]

[α]<sub>D</sub><sup>20</sup> = −27.6 (*c* = 0.66, CHCl<sub>3</sub>).

**IR (ATR):**  $\tilde{\nu}$  [cm<sup>−1</sup>] = 3055 (w), 2964 (w, CH), 2922 (w, CH), 2877 (w, CH), 1697 (vs,

C=O), 1644 (s, C=O), 1596 (m, C=C), 1472 (m), 1450 (m), 1306 (m), 1202 (s), 1161 (m), 1129 (m), 929 (m), 884 (m), 852 (m).

**<sup>1</sup>H-NMR** (500 MHz, CDCl<sub>3</sub>): δ [ppm] = 1.06 (s, 6 H, C(CH<sub>3</sub>)<sub>2</sub>), 1.17-1.29 (m, 2 H, 5-H<sub>endo</sub>, 6-H<sub>endo</sub>), 1.25 (s, 6 H, C(CH<sub>3</sub>)<sub>2</sub>), 1.58-1.74 (m, 2 H, 5-H<sub>exo</sub>, 6-H<sub>exo</sub>), 2.44 (d, <sup>3</sup>J = 3.9 Hz, 1 H, 4-H), 2.48-2.55 (m, 2 H, 3a-H, 8-H), 2.57-2.63 (m, 3 H, CH<sub>2</sub>H<sub>b</sub>Ar, 7a-H), 2.89 (d, <sup>3</sup>J = 3.9 Hz, 1 H, 7-H), 2.94 (d, <sup>2</sup>J = 13.0 Hz, 2 H, CH<sub>2</sub>H<sub>b</sub>Ar), 3.47-3.56 (m, 2 H, 3-H), 6.82 (s, 1 H, 2''-H), 7.08 (s, 2 H, 4''-H, 6''-H), 7.55 (s, 1 H, NH), 9.75 (bs, 2 H, CO<sub>2</sub>H).

**<sup>13</sup>C-NMR** (90.6 MHz, CDCl<sub>3</sub>): δ [ppm] = 23.7 (q, C(CH<sub>3</sub>)<sub>2</sub>), 25.5 (q, C(CH<sub>3</sub>)<sub>2</sub>), 28.8, 28.8 (2 t, C-5, C-6), 39.0 (d, C-8), 41.8 (d, C-3a), 44.2 (s, C(CH<sub>3</sub>)<sub>2</sub>), 45.0 (d, C-7), 46.4 (d, C-4), 46.5 (t, CH<sub>2</sub>Ar), 47.8 (t, C-3), 51.5 (d, C-7a), 83.0 (s, C-2'), 89.1 (s, C-1'), 123.0 (s, C-5''), 130.7 (d, C-4'', C-6''), 132.0 (d, C-2''), 137.7 (s, C-1'', C-3''), 181.1 (s, C-1), 182.4 (s, CO<sub>2</sub>H).

**HRMS** (ESI): C<sub>27</sub>H<sub>34</sub>NO<sub>5</sub> [(M+H)<sup>+</sup>]: calcd.: 452.2431; found: 452.2419

C<sub>27</sub>H<sub>33</sub>NNaO<sub>5</sub> [(M+Na)<sup>+</sup>]: calcd.: 474.2250; found: 474.2235

C<sub>54</sub>H<sub>67</sub>N<sub>2</sub>O<sub>10</sub> [(2M+H)<sup>+</sup>]: calcd.: 903.4790; found: 903.4786.

**Bis[rhodium(3,3'-(5-(((3a*S*,4*R*,7*S*,7a*R*,8*R*)-1-oxooctahydro-1*H*-4,7-methanoisindol-8-yl)ethynyl)-1,3-phenylene)bis(2,2-dimethylpropanoate)))] (**6**)**

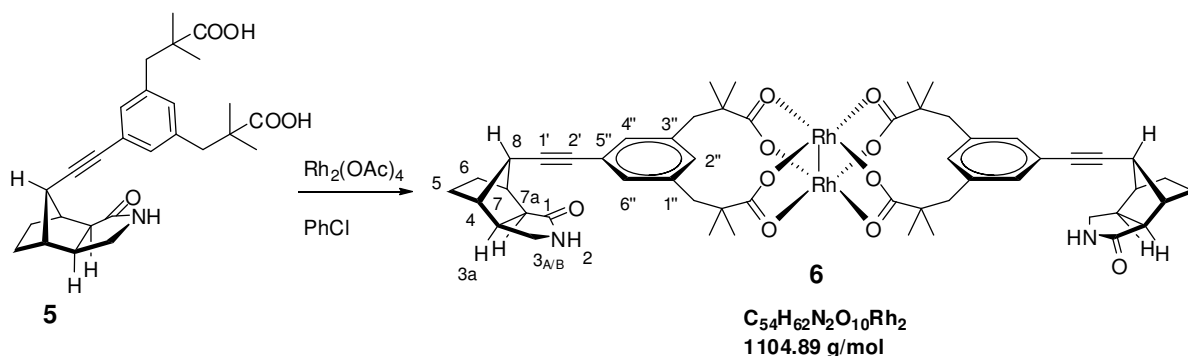

Rh<sub>2</sub>(OAc)<sub>4</sub> (137 mg, 0.309 mmol, 1.0 eq) and **5** (293 mg, 0.649 mmol, 2.1 eq) were dissolved in chlorobenzene (35 mL) and the mixture was stirred at the boiling point (oilbath ~140-145 °C) while the solvent was slowly removed by distillation over the course of three hours. The crude product was dissolved in THF, loaded onto Celite and purified by flash column chromatography (SiO<sub>2</sub>, 16 × 3.25 cm, CH<sub>2</sub>Cl<sub>2</sub>/MeOH 98/2 + 1% AcOH → 96/4 + 1% AcOH → 90/10 + 1% AcOH, UV/ CAM). The title complex **6** (318 mg, 93%) was obtained as a pale blue solid after repeated evaporation with toluene (removal of AcOH) under reduced pressure and drying over night *in vacuo* at 50 °C. If not sufficiently pure (<sup>1</sup>H-NMR), complex **6** was further purified by repeated washing (2-3 times) with dichloromethane.

The structure of **6** was confirmed by X-ray diffraction analysis of a single crystal, obtained by slow diffusion of ethyl acetate vapor into a solution of **6** in DMSO.

**m.p.:** > 250 °C

**TLC:**  $R_f$  = 0.45 (CH<sub>2</sub>Cl<sub>2</sub>/MeOH = 9/1) [UV, CAM].

**Specific Rotation:** [98% *ee*, based on enantiomeric purity of compound **4**]

$[\alpha]_{365}^{20} = -43.2$  ( $c = 0.25$ , THF).

**IR** (ATR):  $\tilde{\nu}$  [cm<sup>-1</sup>] = 2952 (w, CH), 2925 (w, CH), 2875 (w, CH), 1667 (s, C=O), 1580 (vs), 1407 (vs), 1257 (m), 1200 (w), 1137 (w), 1082 (w), 1049 (w), 1019 (w), 932 (w), 878 (m).

**<sup>1</sup>H-NMR** (500 MHz, THF-d<sub>8</sub>):  $\delta$  [ppm] = 0.93 (s, 24 H, C(CH<sub>3</sub>)<sub>2</sub>), 1.15-1.25 (m, 4 H, 5-H<sub>endo</sub>, 6-H<sub>endo</sub>), 1.55-1.69 (m, 4 H, 5-H<sub>exo</sub>, 6-H<sub>exo</sub>), 2.28 (d, <sup>3</sup>*J* = 9.3 Hz, 2 H, 7a-H), 2.35 (d, <sup>3</sup>*J* = 3.4 Hz, 2 H, 4-H), 2.42-2.49 (m, 2 H, 3a-H), 2.52-2.57 (m, 10 H, 8-H, CH<sub>2</sub>Ar), 2.70 (d, <sup>3</sup>*J* = 3.4 Hz, 2 H, 7-H), 3.40-3.49 (m, 4 H, 3-H), 6.04 (s, 2 H, NH), 6.84 (d, <sup>4</sup>*J* = 1.4 Hz, 4 H, 4''-H, 6''-H), 6.88 (s, 2 H, 2''-H).

**<sup>13</sup>C-NMR** (125.8 MHz, THF-d<sub>8</sub>):  $\delta$  [ppm] = 26.1 (q, C(CH<sub>3</sub>)<sub>2</sub>), 29.4 (t, C-6), 29.5 (t, C-5), 39.7 (d, C-8), 42.8 (d, C-3a), 45.3 (d, C-7), 46.2 (s, C(CH<sub>3</sub>)<sub>2</sub>), 46.6 (t, C-3), 47.3 (t, CH<sub>2</sub>Ar), 47.6 (d, C-4), 51.0 (d, C-7a), 83.4 (s, C-2'), 88.6 (s, C-1'), 123.3 (s, C-5''), 131.3 (d, C-2''), 131.5 (d, C-4'', C-6''), 139.1 (s, C-1'', C-3''), 177.5 (s, C-1), 195.9 (s, CO<sub>2</sub>Rh).

**HRMS** (ESI): C<sub>54</sub>H<sub>63</sub>N<sub>2</sub>O<sub>10</sub>Rh<sub>2</sub> [(M+H)<sup>+</sup>]: calcd.: 1105.2587; found: 1105.2553

C<sub>54</sub>H<sub>62</sub>N<sub>2</sub>NaO<sub>10</sub>Rh<sub>2</sub> [(M+Na)<sup>+</sup>]: calcd.: 1127.2407; found: 1127.2361.

#### (4-Bromophenoxy)triisopropylsilane (**S2**)<sup>[4]</sup>

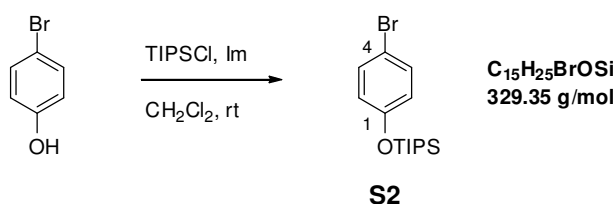

To a solution of 4-bromophenol (1.73 g, 10.0 mmol, 1.0 eq) and imidazole (1.70 g, 25.0 mmol, 2.5 eq) in dichloromethane (63 mL) was added triisopropylsilyl chloride (2.56 mL, 12.0 mmol, 1.2 eq). The reaction was stirred over night at room temperature. The solvent was removed under reduced pressure and pentane (50 mL) and water (100 mL) were added. The layers were separated and the aqueous layer was extracted with pentane (2 × 50 mL). The combined organic layers were dried over Na<sub>2</sub>SO<sub>4</sub> and the solvent was removed



under reduced pressure. The residue was subjected to flash column chromatography (SiO<sub>2</sub>, 14 × 3.25 cm, pentane, UV/CAM) to afford the title compound **S2** as colorless oil (3.26 g, 99%).

**TLC:** *R*<sub>f</sub> = 0.57 (pentane) [UV, CAM].

**<sup>1</sup>H-NMR** (360 MHz, CDCl<sub>3</sub>): δ [ppm] = 1.10 (d, <sup>3</sup>*J* = 7.3 Hz, 18 H, Si(CH(CH<sub>3</sub>)<sub>2</sub>)<sub>3</sub>), 1.19-1.30 (m, 3 H, Si(CH(CH<sub>3</sub>)<sub>2</sub>)<sub>3</sub>), 6.73-6.79 (m, 2 H, 2-H), 7.29-7.34 (m, 2 H, 3-H).

**<sup>13</sup>C-NMR** (90.6 MHz, CDCl<sub>3</sub>): δ [ppm] = 12.8 (d, Si(CH(CH<sub>3</sub>)<sub>2</sub>)<sub>3</sub>), 18.0 (q, Si(CH(CH<sub>3</sub>)<sub>2</sub>)<sub>3</sub>), 113.3 (s, C-4), 121.8 (d, C-Ar), 132.4 (d, C-Ar), 155.4 (s, C-1).

The data obtained matched those reported in the literature.<sup>[4]</sup>

### 3-(Hydroxy(4-methoxyphenyl)methyl)quinolin-2(1*H*)-one (**S7a**)

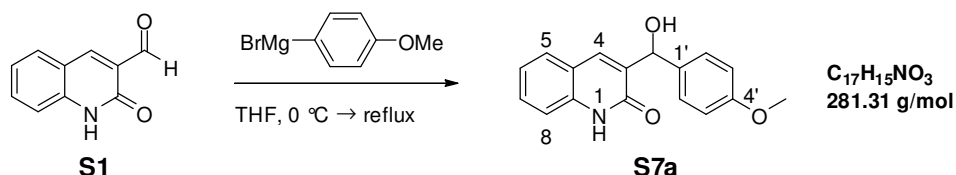

According to *GPI*, aldehyde **S1**<sup>[5]</sup> (1.50 g, 8.66 mmol, 1.0 eq) in THF (22 mL) was reacted with the Grignard-reagent, prepared from magnesium turnings (528 mg, 21.7 mmol, 2.5 eq) and 4-bromoanisole (2.72 mL, 21.7 mmol, 2.5 eq) in THF (22 mL). After work-up, as described in *GPI*, the crude product was subjected to flash column chromatography (SiO<sub>2</sub>, 15 × 3.25 cm, CH<sub>2</sub>Cl<sub>2</sub>/MeOH 98/2 → 97/3, UV/CAM) to afford the title compound as a colorless solid (1.93 g, 79%).

**m.p.:** 168-170 °C

**TLC:** *R*<sub>f</sub> = 0.16 (CH<sub>2</sub>Cl<sub>2</sub>/MeOH = 97/3) [UV, CAM].

**IR** (ATR):  $\tilde{\nu}$  [cm<sup>-1</sup>] = 3009 (w, CH), 2935 (w, CH), 2889 (w), 2839 (w), 1651 (s, C=O), 1611 (m, C=C), 1566 (m, C=C), 1509 (m, C=C), 1430 (m), 1301 (m), 1240 (s, C-O), 1171 (m), 958 (m), 836 (m), 797 (m), 756 (vs).

**<sup>1</sup>H-NMR** (360 MHz, DMSO-*d*<sub>6</sub>): δ [ppm] = 3.70 (s, 3 H, OCH<sub>3</sub>), 5.71 (d, <sup>3</sup>*J* = 4.2 Hz, 1 H, CHOH), 5.75 (d, <sup>3</sup>*J* = 4.2 Hz, 1 H, CHOH), 6.81-6.86 (m, 2 H, 3'-H), 7.14-7.19 (*virt. t.*, <sup>3</sup>*J* ≈ 7.5 Hz, 1 H, 6-H), 7.26-7.33 (m, 3 H, 2'-H, 8-H), 7.42-7.47 (m, 1 H, 7-H), 7.71 (d, <sup>3</sup>*J* = 7.8 Hz, 1 H, 5-H), 8.02 (s, 1 H, 4-H), 11.71 (s, 1 H, NH).

**<sup>13</sup>C-NMR** (90.6 MHz, DMSO-*d*<sub>6</sub>): δ [ppm] = 55.0 (q, OCH<sub>3</sub>), 68.5 (d, CHOH), 113.3 (d, C-

3'), 114.7 (d, C-8), 119.2 (s, C-4a), 121.8 (d, C-6), 127.8 (d, C-5), 127.9 (d, C-2'), 129.6 (d, C-7), 133.8 (d, C-4), 136.0 (s, C-1'), 137.1 (s, C-3), 137.8 (s, C-8a), 158.2 (s, C-4'), 160.8 (s, C-2).

**HRMS** (ESI):  $C_{17}H_{14}NO_2$  [(M-OH)<sup>+</sup>]: calcd.: 264.1019; found: 264.1013  
 $C_{17}H_{16}NO_3$  [(M+H)<sup>+</sup>]: calcd.: 282.1125; found: 282.1119  
 $C_{17}H_{15}NNaO_3$  [(M+Na)<sup>+</sup>]: calcd.: 304.0944; found: 304.0937.

### 3-(Hydroxy(*p*-tolyl)methyl)quinolin-2(1*H*)-one (S4a)

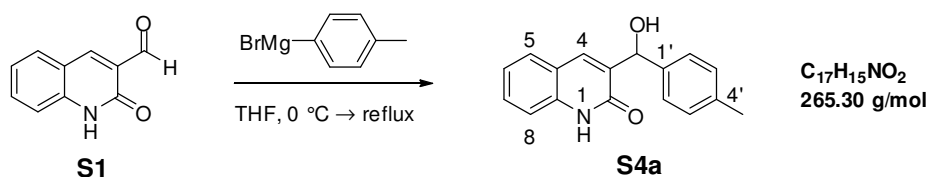

According to *GPI*, aldehyde **S1**<sup>[5]</sup> (500 mg, 2.89 mmol, 1.0 eq) in THF (7.2 mL) was reacted with the Grignard-reagent, prepared from magnesium turnings (175 mg, 7.22 mmol, 2.5 eq) and 1-bromo-4-methylbenzene (1.23 g, 7.22 mmol, 2.5 eq) in THF (7.2 mL). After work-up, as described in *GPI*, the crude product was subjected to flash column chromatography (SiO<sub>2</sub>, 17 × 3.25 cm, CH<sub>2</sub>Cl<sub>2</sub>/EtOAc 4/1, UV/CAM) to afford the title compound as a colorless solid (721 mg, 94%).

**m.p.:** 157-158 °C

**TLC:** *R<sub>f</sub>* = 0.52 (EtOAc) [UV, CAM].

**IR** (ATR):  $\tilde{\nu}$  [cm<sup>-1</sup>] = 3012 (w, CH), 2855 (w, CH), 1653 (vs, C=O), 1618 (m, C=C), 1571 (s, C=C), 1500 (m, C=C), 1431 (s), 1394 (m), 1256 (m), 1219 (s, C-O), 1009 (s), 950 (s), 902 (m), 749 (vs).

**<sup>1</sup>H-NMR** (500 MHz, CDCl<sub>3</sub>):  $\delta$  [ppm] = 2.36 (s, 3 H, CH<sub>3</sub>), 4.75 (d, <sup>3</sup>*J* = 5.0 Hz, 1 H, CHOH), 5.95 (d, <sup>3</sup>*J* = 5.0 Hz, 1 H, CHOH), 7.20 (d, <sup>3</sup>*J* = 8.0 Hz, 2 H, 3'-H), 7.21 (*virt. t.*, <sup>3</sup>*J* ≈ 7.8 Hz, 1 H, 6-H), 7.29 (d, <sup>3</sup>*J* = 8.2 Hz, 1 H, 8-H), 7.41 (d, <sup>3</sup>*J* = 8.2 Hz, 2 H, 2'-H), 7.46-7.51 (m, 1 H, 7-H), 7.51 (d, <sup>3</sup>*J* = 8.1 Hz, 1 H, 5-H), 7.56 (s, 1 H, 4-H), 12.05 (s, 1 H, NH).

**<sup>13</sup>C-NMR** (90.6 MHz, CDCl<sub>3</sub>):  $\delta$  [ppm] = 21.3 (CH<sub>3</sub>), 73.4 (d, CHOH), 115.9 (d, C-8), 120.1 (s, C-4a), 123.2 (d, C-6), 126.9 (d, C-2'), 128.3 (d, C-5), 129.3 (d, C-3'), 130.6 (d, C-7), 134.4 (s, C-3), 137.2 (d, C-4), 137.5 (s, C-8a), 137.6 (s, C-4'), 138.6 (s, C-1'), 164.3 (s, C-2).

**HRMS** (ESI):  $C_{17}H_{14}NO$  [(M-OH)<sup>+</sup>]: calcd.: 248.1070; found: 248.1069  
 $C_{17}H_{16}NO_2$  [(M+H)<sup>+</sup>]: calcd.: 266.1175; found: 266.1176  
 $C_{17}H_{15}NNaO_2$  [(M+Na)<sup>+</sup>]: calcd.: 288.0995; found: 288.0997.

### 3-(Hydroxy(4-((triisopropylsilyl)oxy)phenyl)methyl)quinolin-2(1H)-one (S5a)

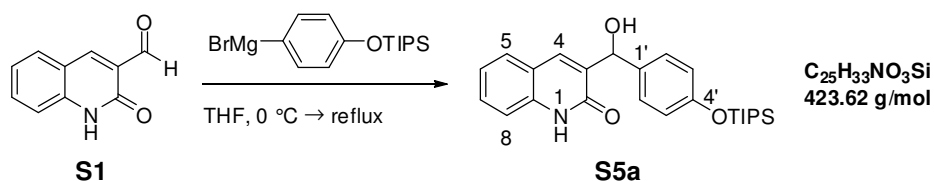

According to *GPI*, aldehyde **S1**<sup>[5]</sup> (260 mg, 1.50 mmol, 1.0 eq) in THF (3.6 mL) was reacted with the Grignard-reagent, prepared from magnesium turnings (91.1 mg, 3.75 mmol, 2.5 eq) and arylbromide **S2** (1.24 g, 3.75 mmol, 2.5 eq) in THF (3.6 mL). After work-up, as described in *GPI*, the crude product was subjected to flash column chromatography (SiO<sub>2</sub>, 17 × 3.25 cm, CH<sub>2</sub>Cl<sub>2</sub>/EtOAc 4/1, UV/CAM) to afford the title compound as a colorless solid (573 mg, 90%).

**m.p.:** 120-123 °C

**TLC:** *R<sub>f</sub>* = 0.62 (EtOAc) [UV, CAM].

**IR** (ATR):  $\tilde{\nu}$  [cm<sup>-1</sup>] = 3164 (w), 3062 (w, CH), 2941 (m, CH), 2891 (w, CH), 2865 (m, CH), 1651 (vs, C=O), 1605 (m, C=C), 1571 (m, C=C), 1507 (s, C=C), 1462 (w), 1431 (w), 1261 (s, C-O), 910 (m), 882 (m), 753 (m) 682 (m).

**<sup>1</sup>H-NMR** (500 MHz, CDCl<sub>3</sub>):  $\delta$  [ppm] = 1.10 (d, <sup>3</sup>*J* = 7.6 Hz, 18 H, Si(CH(CH<sub>3</sub>)<sub>2</sub>)<sub>3</sub>), 1.21-1.31 (m, 3 H, Si(CH(CH<sub>3</sub>)<sub>2</sub>)<sub>3</sub>), 4.82 (d, <sup>3</sup>*J* = 4.5 Hz, 1 H, CHOH), 5.94 (d, <sup>3</sup>*J* = 4.5 Hz, 1 H, CHOH), 6.89-6.93 (m, 2 H, 3'-H), 7.21 (ddd, <sup>3</sup>*J* = 8.2 Hz, <sup>3</sup>*J* = 7.2 Hz, <sup>4</sup>*J* = 1.2 Hz, 1 H, 6-H), 7.31 (d, <sup>3</sup>*J* = 8.3 Hz, 1 H, 8-H), 7.35-7.39 (m, 2 H, 2'-H), 7.46 (s, 1 H, 4-H), 7.45-7.51 (m, 2 H, 5-H, 7-H), 12.26 (s, 1 H, NH).

**<sup>13</sup>C-NMR** (90.6 MHz, CDCl<sub>3</sub>):  $\delta$  [ppm] = 12.8 (d, Si(CH(CH<sub>3</sub>)<sub>2</sub>)<sub>3</sub>), 18.1 (q, Si(CH(CH<sub>3</sub>)<sub>2</sub>)<sub>3</sub>), 73.1 (d, CHOH), 115.9 (d, C-8), 120.1 (d, C-3'), 120.1 (s, C-4a), 123.2 (d, C-6), 128.2, 128.3 (2 d, C-2', C-5), 130.6 (d, C-7), 133.8 (s, C-1'), 134.6 (s, C-3), 137.2 (d, C-4), 137.5 (s, C-8a), 155.9 (s, C-4'), 164.5 (s, C-2).

**HRMS** (ESI): C<sub>25</sub>H<sub>32</sub>NO<sub>2</sub>Si [(M-OH)<sup>+</sup>]: calcd.: 406.2197; found: 406.2192

C<sub>50</sub>H<sub>67</sub>N<sub>2</sub>O<sub>6</sub>Si<sub>2</sub> [(2M+H)<sup>+</sup>]: calcd.: 847.4532; found: 847.4533.

### 3-((4-(*tert*-Butoxy)phenyl)(hydroxy)methyl)quinolin-2(1*H*)-one (S6a)

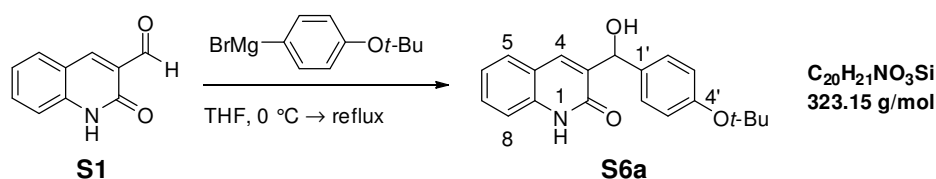

According to *GPI*, aldehyde **S1**<sup>[5]</sup> (260 mg, 1.50 mmol, 1.0 eq) in THF (3.6 mL) was reacted with the Grignard-reagent, prepared from magnesium turnings (91.1 mg, 3.75 mmol, 2.5 eq) and 1-bromo-4-(*tert*-butoxy)benzene (859 mg, 3.75 mmol, 2.5 eq) in THF (3.6 mL). After work-up, as described in *GPI*, the crude product was subjected to flash column chromatography (SiO<sub>2</sub>, 16 × 3.25 cm, CH<sub>2</sub>Cl<sub>2</sub>/EtOAc 4/1 → 1/1, UV/CAM) to afford the title compound as a colorless solid (396 mg, 82%).

**m.p.:** 183-184 °C

**TLC:** *R<sub>f</sub>* = 0.60 (EtOAc) [UV, CAM].

**IR** (ATR):  $\tilde{\nu}$  [cm<sup>-1</sup>] = 2973 (w, CH), 1650 (vs, C=O), 1606 (m, C=C), 1570 (m, C=C), 1499 (m, C=C), 1364 (m), 1234 (m, C-O), 1160 (s), 898 (s), 858 (m), 757 (s).

**<sup>1</sup>H-NMR** (500 MHz, DMSO-*d*<sub>6</sub>):  $\delta$  [ppm] = 1.26 (s, 9 H, C(CH<sub>3</sub>)<sub>3</sub>), 5.76 (d, <sup>3</sup>*J* = 4.4 Hz, 1 H, CHOH), 5.77 (d, <sup>3</sup>*J* = 4.4 Hz, 1 H, CHOH), 6.86-6.90 (m, 2 H, 3'-H), 7.17 (ddd, <sup>3</sup>*J* = 8.3 Hz, <sup>3</sup>*J* = 7.5 Hz, <sup>4</sup>*J* = 1.1 Hz, 1 H, 6-H), 7.27-7.33 (m, 3 H, 8-H, 2'-H), 7.45 (ddd, <sup>3</sup>*J* = 8.3 Hz, <sup>3</sup>*J* = 7.1 Hz, <sup>4</sup>*J* = 1.5 Hz, 1 H, 7-H), 7.72 (dd, <sup>3</sup>*J* = 7.5 Hz, <sup>4</sup>*J* = 1.5 Hz, 1 H, 5-H), 8.04 (s, 1 H, 4-H), 11.72 (s, 1 H, NH).

**<sup>13</sup>C-NMR** (125.8 MHz, DMSO-*d*<sub>6</sub>):  $\delta$  [ppm] = 28.6 (q, C(CH<sub>3</sub>)<sub>3</sub>), 68.5 (d, CHOH), 77.7 (s, C(CH<sub>3</sub>)<sub>3</sub>), 114.8 (d, C-8), 119.2 (s, C-4a), 121.8 (d, C-6), 123.0 (d, C-3'), 127.4 (d, C-2'), 127.9 (d, C-5), 129.7 (d, C-7), 134.0 (d, C-4), 137.0 (s, C-3), 137.8 (s, C-8a), 138.6 (s, C-1'), 153.9 (s, C-4'), 160.9 (s, C-2).

**HRMS** (ESI): C<sub>20</sub>H<sub>20</sub>NO<sub>2</sub> [(M-OH)<sup>+</sup>]: calcd.: 306.1489; found: 306.1489

C<sub>20</sub>H<sub>21</sub>NNaO<sub>3</sub> [(M+Na)<sup>+</sup>]: calcd.: 346.1414; found: 346.1414

C<sub>40</sub>H<sub>42</sub>N<sub>2</sub>NaO<sub>6</sub> [(2M+Na)<sup>+</sup>]: calcd.: 669.2935; found: 669.2938.

### 3-(Hydroxy(4-(octyloxy)phenyl)methyl)quinolin-2(1H)-one (S3a)

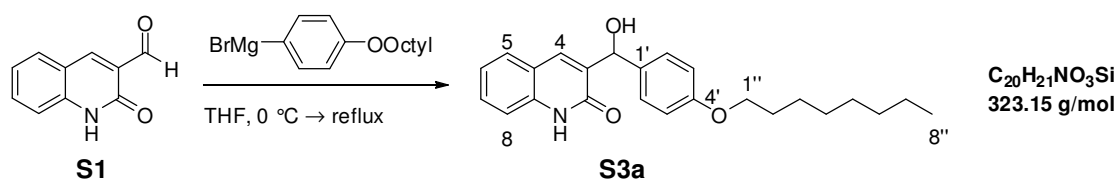

According to *GPI*, aldehyde **S1**<sup>[5]</sup> (173 mg, 1.00 mmol, 1.0 eq) in THF (2.5 mL) was reacted with the Grignard-reagent, prepared from magnesium turnings (60.8 mg, 2.50 mmol, 2.5 eq) and 1-bromo-4-(octyloxy)benzene (713 mg, 2.50 mmol, 2.5 eq) in THF (2.5 mL). After work-up, as described in *GPI*, the crude product was subjected to flash column chromatography (SiO<sub>2</sub>, 17 × 2 cm, CH<sub>2</sub>Cl<sub>2</sub>/EtOAc 4/1 → 1/1, UV/CAM) to afford the title compound as a colorless solid (328 mg, 87%).

**m.p.:** 117-118 °C

**TLC:** *R<sub>f</sub>* = 0.58 (EtOAc) [UV, CAM].

**IR** (ATR):  $\tilde{\nu}$  [cm<sup>-1</sup>] = 2925 (w, CH), 2853 (w, CH), 1650 (vs, C=O), 1608 (m, C=C), 1568 (s, C=C), 1508 (s, C=C), 1394 (w), 1240 (vs, C-O), 1172 (m), 1021 (m), 832 (s), 756 (vs).

**<sup>1</sup>H-NMR** (500 MHz, DMSO-*d*<sub>6</sub>):  $\delta$  [ppm] = 0.84 (t, <sup>3</sup>*J* = 6.9 Hz, 3 H, 8''-H), 1.18-1.32 (m, 8 H, 4''-H, 5''-H, 6''-H, 7''-H), 1.33-1.40 (m, 2 H, 3''-H), 1.66 (*virt.* quint, <sup>3</sup>*J* ≈ 6.8 Hz, 2 H, 2''-H), 3.89 (t, <sup>3</sup>*J* = 6.5 Hz, 2 H, 1''-H), 5.70 (d, <sup>3</sup>*J* = 4.2 Hz, 1 H, CHOH), 5.75 (d, <sup>3</sup>*J* = 4.2 Hz, 1 H, CHOH), 6.79-6.85 (m, 2 H, 3'-H), 7.16 (ddd, <sup>3</sup>*J* = 8.3 Hz, <sup>3</sup>*J* = 7.6 Hz, <sup>4</sup>*J* = 1.1 Hz, 1 H, 6-H), 7.26-7.32 (m, 3 H, 2'-H, 8-H), 7.44 (ddd, <sup>3</sup>*J* = 8.3 Hz, <sup>3</sup>*J* = 7.2 Hz, <sup>4</sup>*J* = 1.4 Hz, 1 H, 7-H), 7.71 (dd, <sup>3</sup>*J* = 7.6 Hz, <sup>4</sup>*J* = 1.4 Hz, 1 H, 5-H), 8.02 (s, 1 H, 4-H), 11.71 (s, 1 H, NH).

**<sup>13</sup>C-NMR** (90.6 MHz, DMSO-*d*<sub>6</sub>):  $\delta$  [ppm] = 13.9 (q, C-8''), 22.1 (t, CH<sub>2</sub>), 25.5 (t, C-3''), 28.6, 28.7, 28.7 (3 t, C-2'', 2 CH<sub>2</sub>), 31.2 (t, CH<sub>2</sub>), 67.3 (t, C-1''), 68.5 (CHOH), 113.8 (d, C-3'), 114.7 (d, C-8), 119.2 (s, C-4a), 121.7 (d, C-6), 127.8 (d, C-5), 127.9 (d, C-2'), 129.6 (d, C-7), 133.8 (d, C-4), 135.8 (s, C-1'), 137.1 (s, C-3), 137.8 (s, C-8a), 157.6 (s, C-4'), 160.8 (s, C-2).

**HRMS** (ESI): C<sub>24</sub>H<sub>28</sub>NO<sub>2</sub> [(M-OH)<sup>+</sup>]: calcd.: 362.2114; found: 362.2112

C<sub>24</sub>H<sub>29</sub>NNaO<sub>3</sub> [(M+Na)<sup>+</sup>]: calcd.: 402.2040; found: 402.2042

C<sub>48</sub>H<sub>58</sub>N<sub>2</sub>NaO<sub>6</sub> [(2M+Na)<sup>+</sup>]: calcd.: 781.4187; found: 781.4198.

### 3-(4-Methoxybenzyl)quinolin-2(1H)-one (**7**)

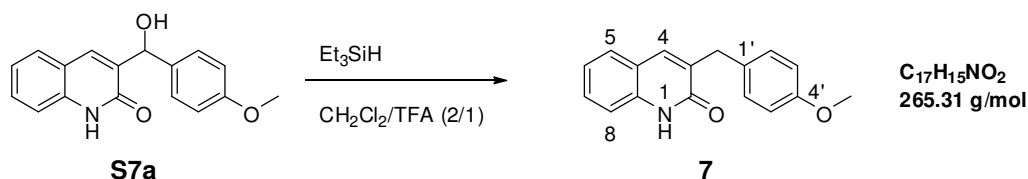

According to *GP2*, quinolone **S7a** (551 mg, 1.96 mmol, 1.0 eq) was reacted with triethylsilane (0.78 mL, 4.90 mmol, 2.5 eq) in dichloromethane/trifluoroacetic acid (9.4 mL/4.7 mL) at room temperature for 20 minutes. After work-up, as described in *GP2*, the crude product was subjected to flash column chromatography (SiO<sub>2</sub>, 13 × 3.25 cm, CH<sub>2</sub>Cl<sub>2</sub>/MeOH 97/3, UV/CAM) to afford the title compound as colorless solid (515 mg, 99%).

**m.p.:** 185-186 °C

**TLC:** *R<sub>f</sub>* = 0.65 (CH<sub>2</sub>Cl<sub>2</sub>/MeOH = 9/1) [UV, CAM].

**IR** (ATR):  $\tilde{\nu}$  [cm<sup>-1</sup>] = 2837 (w, CH), 1651 (s, C=O), 1608 (w, C=C), 1572 (m, C=C), 1508 (m, C=C), 1239 (s, C-O), 1177 (m), 1029 (s), 909 (s), 760 (vs), 689 (m).

**<sup>1</sup>H-NMR** (500 MHz, CDCl<sub>3</sub>):  $\delta$  [ppm] = 3.81 (s, 3 H, OCH<sub>3</sub>), 3.96 (s, 2 H, CH<sub>2</sub>Ar), 6.87-6.91 (m, 2 H, 3'-H), 7.16 (ddd, <sup>3</sup>*J* = 8.0 Hz, <sup>3</sup>*J* = 7.2, <sup>4</sup>*J* = 1.1 Hz, 1 H, 6-H), 7.24-7.28 (m, 2 H, 2'-H), 7.29-7.32 (m, 1 H, 8-H), 7.41-7.46 (m, 3 H, 5-H, 4-H, 7-H), 11.57 (s, 1 H, NH).

**<sup>13</sup>C-NMR** (90.6 MHz, CDCl<sub>3</sub>):  $\delta$  [ppm] = 35.5 (t, CH<sub>2</sub>Ar), 55.4 (q, OCH<sub>3</sub>), 114.1 (d, C-3'), 115.8 (d, C-8), 120.4 (s, C-4a), 122.5 (d, C-6), 127.4 (d, C-5), 129.7 (d, C-7), 130.5 (d, C-2'), 131.3 (s, C-1'), 134.0 (s, C-3), 137.4 (d, C-4), 137.6 (s, C-8a), 158.4 (s, C-4'), 164.2 (s, C-2).

**HRMS** (ESI): C<sub>17</sub>H<sub>16</sub>NO<sub>2</sub> [(M+H)<sup>+</sup>]: calcd.: 266.1176; found: 266.1179

C<sub>17</sub>H<sub>15</sub>NNaO<sub>2</sub> [(M+Na)<sup>+</sup>]: calcd.: 288.0995; found: 288.0999

C<sub>34</sub>H<sub>31</sub>N<sub>2</sub>O<sub>4</sub> [(2M+H)<sup>+</sup>]: calcd.: 531.2278; found: 531.2291.

### 3-(4-((Triisopropylsilyl)oxy)benzyl)quinolin-2(1H)-one (**S5b**)

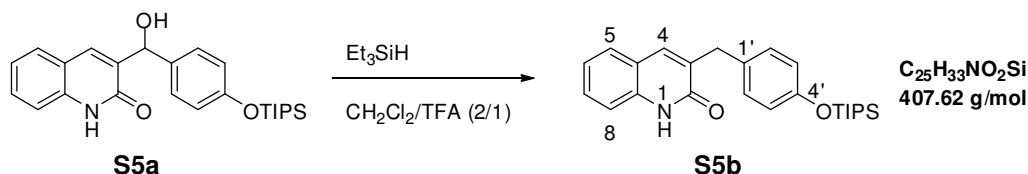

According to *GP2*, quinolone **S5a** (414 mg, 0.977 mmol, 1.0 eq) was reacted with triethylsilane (388  $\mu$ L, 2.44 mmol, 2.5 eq) in dichloromethane/trifluoroacetic acid (4.9 mL/2.5 mL) at room temperature for 15 minutes. After work-up, as described in *GP2*, the

crude product was subjected to flash column chromatography (SiO<sub>2</sub>, 18 × 2.5 cm, CH<sub>2</sub>Cl<sub>2</sub>/MeOH 99/1, UV/CAM) to afford the title compound as colorless solid (377 mg, 95%).

**m.p.:** 117-118 °C

**TLC:** *R*<sub>f</sub> = 0.41 (CH<sub>2</sub>Cl<sub>2</sub>/MeOH = 95/5) [UV, CAM].

**IR** (ATR):  $\tilde{\nu}$  [cm<sup>-1</sup>] = 2942 (w, CH), 2865 (w, CH), 1651 (s, C=O), 1606 (w, C=C), 1573 (m, C=C), 1504 (s, C=C), 1258 (s, C-O), 908 (vs), 882 (vs), 811 (m), 750 (s), 672 (s).

**<sup>1</sup>H-NMR** (500 MHz, CDCl<sub>3</sub>):  $\delta$  [ppm] = 1.11 (d, <sup>3</sup>*J* = 7.4 Hz, 18 H, Si(CH(CH<sub>3</sub>)<sub>2</sub>)<sub>3</sub>), 1.21-1.32 (m, 3 H, Si(CH<sub>2</sub>(CH<sub>3</sub>)<sub>2</sub>)<sub>3</sub>), 3.96 (s, 2 H, CH<sub>2</sub>Ar), 6.84-6.89 (m, 2 H, 3'-H), 7.13-7.17 (m, 1 H, 6-H), 7.17-7.20 (m, 2 H, 2'-H), 7.35-7.38 (m, 2 H, 4-H, 8-H), 7.39-7.42 (m, 1 H, 5-H), 7.42-7.47 (m, 1 H, 7-H), 12.12 (s, 1 H, NH).

**<sup>13</sup>C-NMR** (90.6 MHz, CDCl<sub>3</sub>):  $\delta$  [ppm] = 12.8 (d, Si(CH<sub>2</sub>(CH<sub>3</sub>)<sub>2</sub>)<sub>3</sub>), 18.1 (q, Si(CH(CH<sub>3</sub>)<sub>2</sub>)<sub>3</sub>), 35.5 (t, CH<sub>2</sub>Ar), 115.8 (d, C-8), 120.1 (d, C-3'), 120.4 (s, C-4a), 122.5 (d, C-6), 127.3 (d, C-5), 129.6 (d, C-7), 130.5 (d, C-2'), 131.5 (s, C-1'), 134.2 (s, C-3), 137.4 (d, C-4), 137.6 (s, C-8a), 154.7 (s, C-4'), 164.4 (s, C-2).

**HRMS** (ESI): C<sub>25</sub>H<sub>34</sub>NO<sub>2</sub>Si [(M+H)<sup>+</sup>]: calcd.: 408.2353; found: 408.2356

C<sub>50</sub>H<sub>67</sub>N<sub>2</sub>O<sub>4</sub>Si<sub>2</sub> [(2M+H)<sup>+</sup>]: calcd.: 815.4634; found: 815.4637.

### 3-(4-(Octyloxy)benzyl)quinolin-2(1H)-one (S3b)

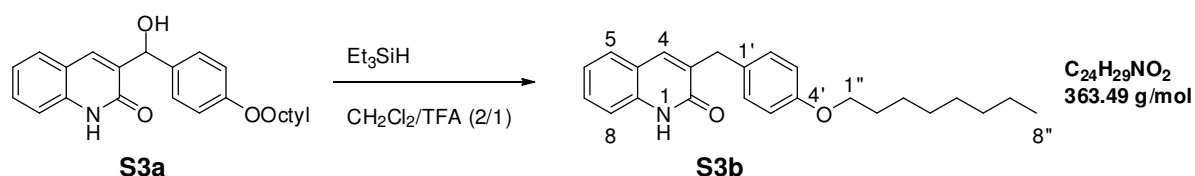

According to GP2, quinolone **S3a** (288 mg, 0.759 mmol, 1.0 eq) was reacted with triethylsilane (302  $\mu$ L, 1.90 mmol, 2.5 eq) in dichloromethane/trifluoroacetic acid (3.6 mL/1.8 mL) at room temperature for 15 minutes. After work-up, as described in GP2, the crude product was subjected to flash column chromatography (SiO<sub>2</sub>, 17 × 2 cm, CH<sub>2</sub>Cl<sub>2</sub>/MeOH 99/1 → 95/5, UV/CAM) to afford the title compound as colorless solid (261 mg, 95%).

**m.p.:** 116-117 °C

**TLC:** *R*<sub>f</sub> = 0.62 (CH<sub>2</sub>Cl<sub>2</sub>/MeOH = 9/1) [UV, CAM].

**IR** (ATR):  $\tilde{\nu}$  [cm<sup>-1</sup>] = 3054 (w, CH), 2954 (w, CH), 2920 (w, CH), 2848 (w, CH), 2767 (w),

1655 (s, C=O), 1610 (w, C=C), 1574 (m, C=C), 1508 (s, C=C), 1241 (vs, C-O), 1174 (m), 902 (s), 847 (m).

**<sup>1</sup>H-NMR** (500 MHz, CDCl<sub>3</sub>): δ [ppm] = 0.88 (t, <sup>3</sup>J = 6.7 Hz, 3 H, 8''-H), 1.22-1.38 (m, 8 H, 4''-H, 5''-H, 6''-H, 7''-H), 1.45 (*virt.* quint, <sup>3</sup>J ≈ 7.0 Hz, 2 H, 3''-H), 1.77 (*virt.* quint, <sup>3</sup>J ≈ 6.8 Hz, 2 H, 2''-H), 3.94 (t, <sup>3</sup>J = 6.6 Hz, 2 H, 1''-H), 3.96 (s, 2 H, CH<sub>2</sub>Ar), 6.85-6.89 (m, 2 H, 3'-H), 7.13-7.18 (m, 1 H, 6-H), 7.23-7.27 (m, 2 H, 2'-H), 7.34 (d, <sup>3</sup>J = 8.3 Hz, 1 H), 7.40-7.46 (m, 3 H, 4-H, 5-H, 7-H), 12.13 (s, 1 H, NH).

**<sup>13</sup>C-NMR** (125.8 MHz, CDCl<sub>3</sub>): δ [ppm] = 14.3 (q, C-8''), 22.8 (t, CH<sub>2</sub>), 26.2 (t, C-3''), 29.4, 29.5, 29.5 (3 t, C-2'', 2 CH<sub>2</sub>), 32.0 (t, CH<sub>2</sub>), 35.5 (t, CH<sub>2</sub>Ar), 68.1 (t, C-1''), 114.7 (d, C-3'), 115.8 (d, C-8), 120.3 (s, C-4a), 122.5 (d, C-6), 127.4, 129.6 (2 d, C-5, C7), 130.5 (d, C-2'), 131.0 (s, C-1'), 134.0 (s, C-3), 137.4, 137.6 (d, C-4, s, C-8a), 157.9 (s, C-4'), 164.3 (s, C-2).

**HRMS** (ESI): C<sub>24</sub>H<sub>30</sub>NO<sub>2</sub> [(M+H)<sup>+</sup>]: calcd.: 364.2271; found: 364.2267  
C<sub>48</sub>H<sub>59</sub>N<sub>2</sub>O<sub>4</sub> [(2M+H)<sup>+</sup>]: calcd.: 727.4469; found: 727.4460.

### 3-(4-(*tert*-Butoxy)benzyl)quinolin-2(1*H*)-one (S6b)

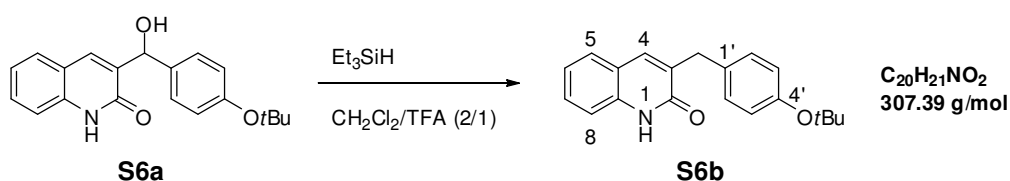

According to *GP2*, quinolone **S6a** (283 mg, 0.875 mmol, 1.0 eq) was reacted with triethylsilane (348 μL, 2.19 mmol, 2.5 eq) and trifluoroacetic acid (337 μL, 4.38 mmol, 5.0 eq) in dichloromethane (5.3 mL) at 0 °C for 40 minutes. After work-up, as described in *GP2*, the crude product was subjected to flash column chromatography (SiO<sub>2</sub>, 17 × 2 cm, CH<sub>2</sub>Cl<sub>2</sub>/MeOH 98/2, UV/CAM) to afford the title compound as colorless solid (241 mg, 90%).

**m.p.:** 176-178 °C

**TLC:** *R<sub>f</sub>* = 0.55 (CH<sub>2</sub>Cl<sub>2</sub>/MeOH = 9/1) [UV, CAM].

**IR** (ATR):  $\tilde{\nu}$  [cm<sup>-1</sup>] = 3013 (w, CH), 2975 (w, CH), 2910 (w, CH), 2835 (w, CH), 1656 (vs, C=O), 1604 (w, C=C), 1572 (s, C=C), 1500 (s, C=C), 1435 (m), 1388 (w, C(CH<sub>3</sub>)<sub>3</sub>), 1362 (w, C(CH<sub>3</sub>)<sub>3</sub>), 1232 (s, C-O), 1160 (vs), 894 (vs).

**<sup>1</sup>H-NMR** (500 MHz, CDCl<sub>3</sub>): δ [ppm] = 1.34 (s, 9 H, C(CH<sub>3</sub>)<sub>3</sub>), 3.97 (s, 2 H, CH<sub>2</sub>Ar), 6.94-6.98 (m, 1 H, 3'-H), 7.16 (ddd, <sup>3</sup>J = 8.0 Hz, <sup>3</sup>J = 7.1 Hz, <sup>4</sup>J = 1.0 Hz, 1 H, 6-H), 7.20-7.25 (m, 2 H, 2'-H), 7.31 (d, <sup>3</sup>J = 8.1 Hz, 1 H, 8-H), 7.40 (s, 1 H, 4-H), 7.41-7.47 (m, 2 H, 5-H, 7-H),



11.42 (s, 1 H, NH).

**<sup>13</sup>C-NMR** (90.6 MHz, CDCl<sub>3</sub>): δ [ppm] = 29.0 (q, C(CH<sub>3</sub>)<sub>3</sub>), 35.6 (t, CH<sub>2</sub>Ar), 78.4 (s, C(CH<sub>3</sub>)<sub>3</sub>), 115.7 (d, C-3'), 120.3 (s, C-4a), 122.5 (d, C-6), 124.4 (d, C-3'), 127.4 (d, C-5), 129.7 (d, C-7), 130.0 (d, C-2'), 133.9 (s, C-3), 134.1 (s, C-1'), 137.6, 137.6 (d, C-4, s, C-8a), 154.0 (s, C-4'), 164.2 (s, C-2).

**HRMS** (ESI): C<sub>20</sub>H<sub>22</sub>NO<sub>2</sub> [(M+H)<sup>+</sup>]: calcd.: 308.1645; found: 308.1643

C<sub>20</sub>H<sub>21</sub>NNaO<sub>2</sub> [(M+Na)<sup>+</sup>]: calcd.: 330.1464; found: 330.1464.

### 3-(4-Methylbenzyl)quinolin-2(1H)-one (S4b)

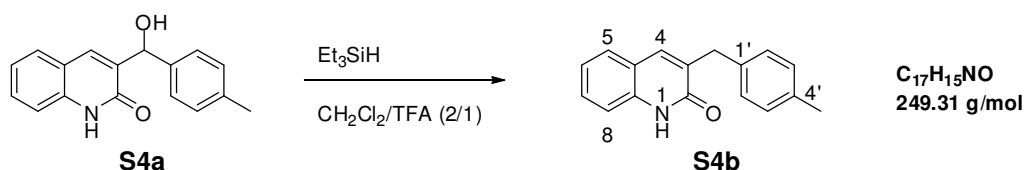

According to GP2, quinolone **S4a** (420 mg, 1.58 mmol, 1.0 eq) was reacted with triethylsilane (0.63 mL, 3.95 mmol, 2.5 eq) in dichloromethane/trifluoroacetic acid (7.9 mL/4.0 mL) at room temperature for 15 minutes. After work-up, as described in GP2, the crude product was subjected to flash column chromatography (SiO<sub>2</sub>, 19 × 2.5 cm, CH<sub>2</sub>Cl<sub>2</sub>/MeOH 98/2, UV/CAM) to afford the title compound as colorless solid (368 mg, 93%).

**m.p.:** 177-178 °C

**TLC:** R<sub>f</sub> = 0.35 (CH<sub>2</sub>Cl<sub>2</sub>/MeOH = 95/5) [UV, CAM].

**IR** (ATR):  $\tilde{\nu}$  [cm<sup>-1</sup>] = 3148 (w), 3004 (w, CH), 2894 (w, CH), 2853 (w, CH), 2773 (w), 1650 (vs, C=O), 1620 (m, C=C), 1570 (s, C=C), 1511 (m, , C=C), 1434 (s), 1268 (w), 1229 (w), 1146 (w), 898 (s).

**<sup>1</sup>H-NMR** (500 MHz, CDCl<sub>3</sub>): δ [ppm] = 2.34 (s, 3 H, CH<sub>3</sub>), 3.99 (s, 2 H, CH<sub>2</sub>Ar), 7.13-7.17 (m, 3 H, 3'-H, 6-H), 7.24 (d, <sup>3</sup>J = 7.8 Hz, 2 H, 2'-H), 7.34 (d, <sup>3</sup>J = 8.3 Hz, 1 H, 8-H), 7.41-7.45 (m, 3 H, 4-H, 5-H, 7-H), 12.08 (s, 1 H, NH).

**<sup>13</sup>C-NMR** (90.6 MHz, CDCl<sub>3</sub>): δ [ppm] = 21.2 (q, CH<sub>3</sub>), 35.9 (CH<sub>2</sub>Ar), 115.8 (d, C-8), 120.4 (s, C-4a), 122.5 (d, C-6), 127.3 (d, C-5), 129.4 (d, C-3'), 129.5 (d, C-2'), 129.6 (d, C-7), 133.9 (s, C-3), 136.0 (s, C-4'), 136.2 (s, C-1'), 137.5 (d, C-4), 137.7 (s, C-8a), 164.3 (s, C-2).

**HRMS** (ESI): C<sub>17</sub>H<sub>16</sub>NO [(M+H)<sup>+</sup>]: calcd.: 250.1226; found: 250.1226

C<sub>17</sub>H<sub>15</sub>NNaO [(M+Na)<sup>+</sup>]: calcd.: 272.1046; found: 272.1045

C<sub>34</sub>H<sub>31</sub>N<sub>2</sub>O<sub>2</sub> [(2M+H)<sup>+</sup>]: calcd.: 499.2380; found: 499.2384

C<sub>34</sub>H<sub>30</sub>N<sub>2</sub>NaO<sub>2</sub> [(2M+Na)<sup>+</sup>]: calcd.: 521.2199; found: 521.2202.

### 7-Bromo-3-(4-methoxybenzyl)quinolin-2(1H)-one (S8)<sup>[6]</sup>

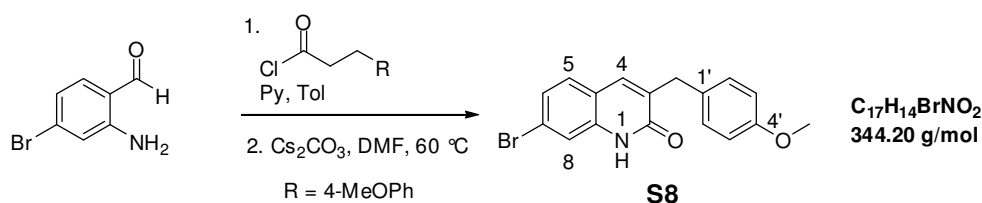

According to *GP3*, 3-(4-methoxyphenyl)propanoic acid was converted to the corresponding acid chloride (1.52 g, 7.67 mmol, 1.3 eq), dissolved in toluene (8 mL) and added to a solution of 2-amino-4-bromobenzaldehyde<sup>[7]</sup> (1.18 g, 5.90 mmol, 1.0 eq) and pyridine (0.48 mL, 5.90 mmol, 1.0 eq) in toluene (18 mL) at 0 °C. The reaction mixture was stirred for two hours at room temperature, then was quenched with water (50 mL) and extracted with EtOAc (3 × 30 mL). The combined organic layers were successively washed with HCl (25 mL, 0.25 M), saturated NaHCO<sub>3</sub> solution (25 mL) and saturated NaCl solution (25 mL) and dried over Na<sub>2</sub>SO<sub>4</sub>. After removal of the solvent under reduced pressure the residue was redissolved in DMF (61 mL). Cesium carbonate (9.61 g, 29.5 mmol, 5.0 eq) was added and the mixture stirred at 60 °C over night. The solvent was removed under reduced pressure and saturated NH<sub>4</sub>Cl solution (100 mL) and water (100 mL) were added to the residue. The formed precipitate was collected by filtration, repeatedly washed with water and dried by evaporation with toluene under reduced pressure. The crude product was redissolved in dichloromethane/methanol, loaded onto Celite and purified by flash column chromatography (SiO<sub>2</sub>, 18 × 3.25 cm, CH<sub>2</sub>Cl<sub>2</sub>/EtOAc 9/1 → 4/1, UV/CAM) to afford the title compound as a colorless solid (1.37 g, 67%).

**m.p.:** 193-194 °C

**TLC:** *R<sub>f</sub>* = 0.62 (EtOAc) [UV, CAM].

**IR** (ATR):  $\tilde{\nu}$  [cm<sup>-1</sup>] = 3150 (w), 3001 (w, CH), 2932 (w, CH), 2834 (w, CH), 1659 (vs, C=O), 1605 (m, C=C), 1567 (s, C=C), 1509 (m, C=C), 1402 (w), 1241 (m, C-O), 1177 (w), 1034 (w), 805 (w).

**<sup>1</sup>H-NMR** (500 MHz, CDCl<sub>3</sub>):  $\delta$  [ppm] = 3.81 (s, 3, OCH<sub>3</sub>), 3.93 (s, 2 H, CH<sub>2</sub>Ar), 6.88-6.92 (m, 2 H, 3'-H), 7.24-7.29 (m, 3 H, 2'-H, 6-H), 7.30 (d, <sup>3</sup>*J* = 8.4 Hz, 1 H, 5-H), 7.38 (s, 1 H, 4-H), 7.52 (s, 1 H, 8-H), 11.85 (s, 1 H, NH).

**<sup>13</sup>C-NMR** (125.8 MHz, CDCl<sub>3</sub>):  $\delta$  [ppm] = 35.6 (t, CH<sub>2</sub>Ar), 55.4 (q, OCH<sub>3</sub>), 114.2 (d, C-3'), 118.4 (d, C-8), 119.2 (s, C-4a), 123.7 (s, C-7), 126.0 (d, C-6), 128.7 (d, C-5), 130.6 (d, C-2'), 130.7 (s, C-1'), 134.5 (s, C-3), 136.8 (d, C-4), 138.4 (s, C-8a), 158.4 (s, C-4'), 164.1 (s, C-2).

|                                                     |                                    |
|-----------------------------------------------------|------------------------------------|
| <b>HRMS</b> (ESI): $C_{17}H_{15}BrNO_2 [(M+H)^+]$ : | calcd.: 344.0281; found: 344.0281  |
| $C_{17}H_{14}BrNNaO_2 [(M+Na)^+]$ :                 | calcd.: 366.0100; found: 366.0099  |
| $C_{34}H_{29}Br_2N_2O_4 [(2M+H)^+]$ :               | calcd.: 687.0489; found: 687.0501  |
| $C_{34}H_{28}Br_2N_2NaO_4 [(2M+Na)^+]$ :            | calcd.: 709.0307; found: 709.0317. |

### 3-(4-Methoxyphenethyl)quinolin-2(1H)-one (S9)<sup>[6]</sup>

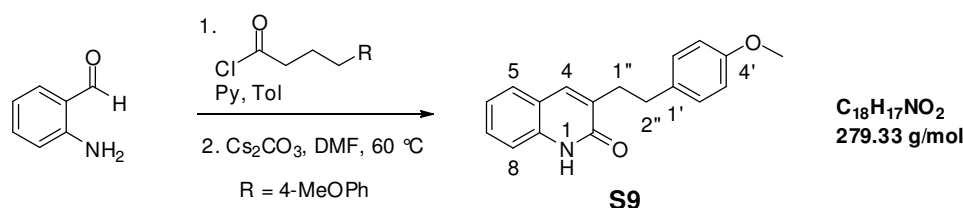

According to *GP3*, 4-(4-methoxyphenyl)butanoic acid was converted to the corresponding acid chloride (1.52 g, 7.15 mmol, 1.3 eq), dissolved in toluene (8 mL) and added to a solution of 2-aminobenzaldehyde<sup>[8]</sup> (660 mg, 5.45 mmol, 1.0 eq) and pyridine (0.44 mL, 5.45 mmol, 1.0 eq) in toluene (24 mL) at 0 °C. The reaction mixture was stirred for one hour at 0 °C, then was quenched with water (30 mL) and extracted with EtOAc (3 × 30 mL). The combined organic layers were successively washed with HCl (30 mL, 2 M), saturated NaHCO<sub>3</sub> solution (30 mL) and saturated NaCl solution (30 mL) and dried over Na<sub>2</sub>SO<sub>4</sub>. After removal of the solvent under reduced pressure the residue was redissolved in DMF (55 mL). Cesium carbonate (8.89 g, 27.3 mmol, 5.0 eq) was added and the mixture was stirred at 60 °C over night. After quenching the reaction with saturated NH<sub>4</sub>Cl solution (40 mL) the mixture was extracted with dichloromethane (50 mL). The organic layer was washed with water (2 × 40 mL), dried over Na<sub>2</sub>SO<sub>4</sub> and the solvent was removed under reduced pressure. The crude product was dissolved in dichloromethane/methanol, loaded onto Celite and subjected to flash column chromatography (SiO<sub>2</sub>, 18 × 3 cm, pentane/EtOAc 2/1, UV/CAM) to afford the title compound as a colorless solid (350 mg, 23%).

**m.p.:** 174-176 °C

**TLC:**  $R_f$  = 0.57 (CH<sub>2</sub>Cl<sub>2</sub>/MeOH = 9/1) [UV, CAM].

**IR** (ATR):  $\tilde{\nu}$  [cm<sup>-1</sup>] = 3011 (w, CH), 2909 (w, CH), 2835 (w, CH), 1655 (vs, C=O), 1611 (m, C=C), 1573 (s, C=C), 1509 (vs, C=C), 1243 (vs, C-O), 1175 (m), 1033 (s), 815 (s), 753 (vs).

**<sup>1</sup>H-NMR** (500 MHz, CDCl<sub>3</sub>):  $\delta$  [ppm] = 2.97-3.00 (m, 4 H, 1''-H, 2''-H), 3.79 (s, 3 H, OCH<sub>3</sub>), 6.82-6.86 (m, 2 H, 3'-H), 7.16-7.21 (m, 4 H, 2'-H, 6-H), 7.40 (d, <sup>3</sup>*J* = 8.1 Hz, 1 H, 8-

H), 7.44-7.50 (m, 2 H, 5-H, 7-H), 7.53 (s, 1 H, 4-H), 11.86 (s, 1 H, NH).

<sup>13</sup>C-NMR (90.6 MHz, CDCl<sub>3</sub>): δ [ppm] = 32.8 (t, C-1''), 33.9 (t, C-2''), 55.4 (q, OCH<sub>3</sub>), 113.9 (d, C-3'), 115.7 (d, C-8), 120.4 (s, C-4a), 122.5 (d, C-6), 127.3 (d, C-5), 129.6 (d, C-7), 129.6 (d, C-2'), 133.4 (s, C-3), 133.9 (s, C-1'), 137.3 (d, C-4), 137.7 (s, C-8a), 158.0 (s, C-4'), 164.3 (s, C-2).

**HRMS** (ESI): C<sub>18</sub>H<sub>18</sub>NO<sub>2</sub> [(M+H)<sup>+</sup>]: calcd.: 280.1332; found: 280.1334

C<sub>18</sub>H<sub>17</sub>NNaO<sub>2</sub> [(M+Na)<sup>+</sup>]: calcd.: 302.1151; found: 302.1152

C<sub>36</sub>H<sub>35</sub>N<sub>2</sub>O<sub>4</sub> [(2M+H)<sup>+</sup>]: calcd.: 559.2591; found: 559.2577.

### 3-(3-(4-Methoxyphenyl)propyl)quinolin-2(1H)-one (S10)<sup>[6]</sup>

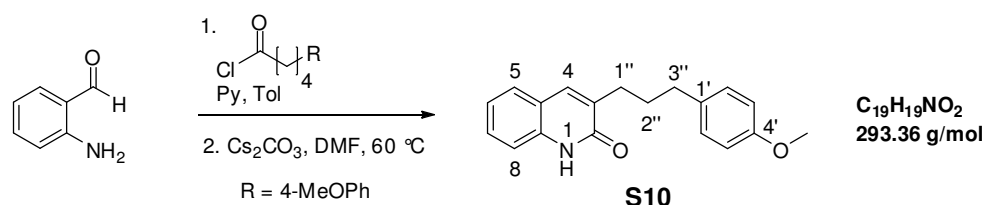

According to *GP3*, 5-(4-methoxyphenyl)pentanoic acid was converted to the corresponding acid chloride (1.33 g, 5.88 mmol, 1.3 eq), dissolved in toluene (8 mL) and added to a solution of 2-aminobenzaldehyde<sup>[8]</sup> (547 mg, 4.52 mmol, 1.0 eq) and pyridine (0.36 mL, 4.52 mmol, 1.0 eq) in toluene (16 mL) at 0 °C. The reaction mixture was stirred for one hour at 0 °C, then was quenched with water (30 mL) and extracted with EtOAc (3 × 30 mL). The combined organic layers were successively washed with HCl (30 mL, 2 M), saturated NaHCO<sub>3</sub> solution (30 mL) and saturated NaCl solution (30 mL) and dried over Na<sub>2</sub>SO<sub>4</sub>. After removal of the solvent under reduced pressure the residue was redissolved in DMF (20 mL). Cesium carbonate (7.36 g, 22.6 mmol, 5.0 eq) was added and the mixture stirred at 60 °C over night. After quenching the reaction with saturated NH<sub>4</sub>Cl solution (40 mL) the mixture was extracted with dichloromethane (50 mL). The organic layer was washed with water (2 × 40 mL), dried over Na<sub>2</sub>SO<sub>4</sub> and the solvent was removed under reduced pressure. The crude product was dissolved in dichloromethane/methanol, loaded onto Celite and subjected to flash column chromatography (SiO<sub>2</sub>, 18 × 3, pentane/EtOAc 2/1, UV/CAM) to afford the title compound as a colorless solid (685 mg, 52%).

**m.p.:** 139-140 °C

**TLC:** *R<sub>f</sub>* = 0.58 (CH<sub>2</sub>Cl<sub>2</sub>/MeOH = 9/1) [UV, CAM].

**IR** (ATR):  $\tilde{\nu}$  [cm<sup>-1</sup>] = 3006 (w, CH), 2836 (w, CH), 1656 (s, C=O), 1608 (w, C=C), 1572 (s,

C=C), 1509 (s, C=C), 1240 (s, C-O), 1034 (s), 897 (s), 751 (vs), 695 (s).

**<sup>1</sup>H-NMR** (360 MHz, CDCl<sub>3</sub>): δ [ppm] = 1.97-2.10 (m, 2 H, 2''-H), 2.65-2.80 (m, 4 H, 1''-H, 3''-H), 3.79 (s, 3 H, OCH<sub>3</sub>), 6.80-6.89 (m, 2 H, 3'-H), 7.13-7.23 (m, 3 H, 2'-H, 6-H), 7.35 (d, <sup>3</sup>J = 8.3 Hz, 1 H, 8-H), 7.45 (ddd, <sup>3</sup>J = 8.3 Hz, <sup>3</sup>J = 7.3 Hz, <sup>4</sup>J = 1.4 Hz, 1 H, 7-H), 7.48-7.52 (dd, <sup>3</sup>J = 7.8 Hz, <sup>4</sup>J = 1.4 Hz, 1 H, 5-H), 7.59 (s, 1 H, 4-H), 11.63 (s, 1H).

**<sup>13</sup>C-NMR** (90.6 MHz, CDCl<sub>3</sub>): δ [ppm] = 30.1 (t, C-1''), 30.4 (t, C-2''), 34.9 (t, C-3''), 55.4 (q, OCH<sub>3</sub>), 113.9 (d, C-3'), 115.6 (d, C-8), 120.4 (s, C-4a), 122.5 (d, C-6), 127.2 (d, C-5), 129.5 (d, C-2'), 129.5 (d, C-7) 134.1 (s, C-3), 134.4 (s, C-1'), 136.8 (d, C-4), 137.6 (s, C-8a), 157.9 (s, C-4'), 164.2 (s, C-2).

**HRMS** (ESI): C<sub>19</sub>H<sub>20</sub>NO<sub>2</sub> [(M+H)<sup>+</sup>]: calcd.: 294.1489; found: 294.1488

C<sub>19</sub>H<sub>19</sub>NNaO<sub>2</sub> [(M+Na)<sup>+</sup>]: calcd.: 316.1308; found: 316.1307.

### 3-(4-Methoxybenzyl)-1-methylquinolin-2(1H)-one (**S7b**)

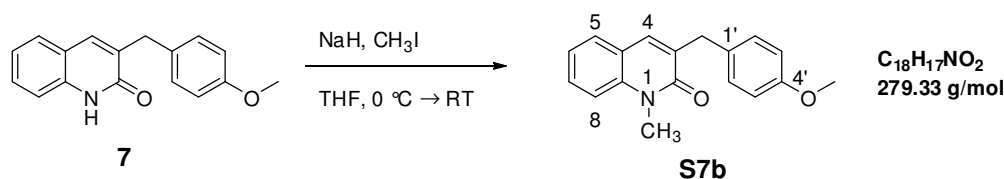

To a solution of quinolone **7** (60.0 mg, 0.226 mmol, 1.0 eq) was added sodium hydride (13.6 mg, 0.339 mmol, 1.5 eq, 60% dispersion in mineral oil) at 0 °C. After stirring at this temperature for one hour, the solution was treated with methyl iodide (28.3 μl, 0.452 mmol, 2.0 eq) and further stirred for 18 hours at room temperature. Saturated NH<sub>4</sub>Cl solution (1 mL) was added, the mixture stirred for one hour and then diluted with water (5 mL). After extraction of the mixture with dichloromethane (3 × 10 mL), the combined organic layers were dried over Na<sub>2</sub>SO<sub>4</sub>. The solvent was removed under reduced pressure and the crude product purified by flash column chromatography (SiO<sub>2</sub>, 11 x 1.5 cm, pentane/EtOAc 4/1, UV/CAM) to afford quinolone **S7b** as colorless solid (56.0 mg, 89%).

**m.p.:** 82-84 °C

**TLC:** *R<sub>f</sub>* = 0.48 (pentane/EtOAc = 1/1) [UV, CAM].

**IR** (ATR):  $\tilde{\nu}$  [cm<sup>-1</sup>] = 3032 (w, CH), 2996 (w, CH), 2938 (w, CH), 2913 (w, CH), 2838 (w), 1645 (s, C=O), 1623 (m), 1593 (vs, C=C), 1573 (m, C=C), 1509 (s, C=C), 1461 (s), 1241, 1220 (vs, C-O, C-N), 1178 (s), 818 (s).

**<sup>1</sup>H-NMR** (500 MHz, CDCl<sub>3</sub>): δ [ppm] = 3.75 (s, 3 H, NCH<sub>3</sub>), 3.80 (s, 3 H, OCH<sub>3</sub>), 3.92 (s, 2

H,  $\text{CH}_2\text{Ar}$ ), 6.86-6.89 (m, 2 H, 3'-H), 7.18 (*virt. t.*,  $^3J \approx 7.5$  Hz, 1 H, 6-H), 7.21-7.24 (m, 2 H, 2'-H), 7.31-7.34 (m, 2 H, 4-H, 8-H), 7.44 (dd,  $^3J = 7.8$  Hz,  $^4J = 1.5$  Hz, 5-H), 7.47-7.52 (m, 1 H, 7-H).

$^{13}\text{C}$ -NMR (90.6 MHz,  $\text{CDCl}_3$ ):  $\delta$  [ppm] = 29.9 (q,  $\text{NCH}_3$ ), 36.3 (t,  $\text{CH}_2\text{Ar}$ ), 55.4 (q,  $\text{OCH}_3$ ), 114.0 (d, C-8), 114.1 (d, C-3'), 120.8 (s, C-4a), 122.1 (d, C-6), 128.4 (d, C-5), 129.7 (d, C-7), 130.5 (d, C-2'), 131.2 (s, C-1'), 133.9 (s, C-3), 135.7 (d, C-4), 139.1 (s, C-8a), 158.3 (s, C-4'), 162.5 (s, C-2).

**HRMS** (ESI):  $\text{C}_{18}\text{H}_{18}\text{NO}_2$  [(M+H) $^+$ ]: calcd.: 280.1332; found: 280.1333

$\text{C}_{18}\text{H}_{17}\text{NNaO}_2$  [(M+Na) $^+$ ]: calcd.: 302.1151; found: 302.1151.

### 3,7-Bis(4-methoxybenzyl)quinolin-2(1H)-one (**16**)

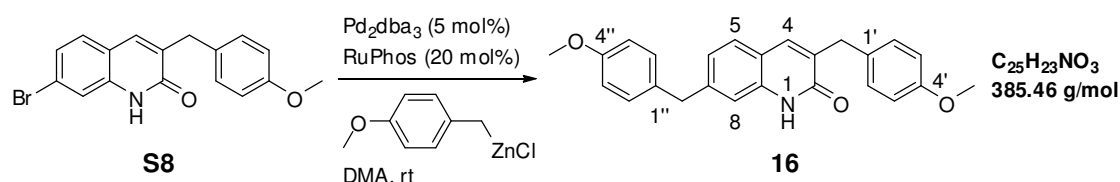

#### Preparation of the organozinc stock solution (4-methoxybenzyl)zinc(II) chloride<sup>[9]</sup>

A flask was charged with dry lithium chloride (159 mg, 3.75 mmol, 1.25 eq) and dry zinc chloride (450 mg, 3.30 mmol, 1.1 eq). The mixture was heated twice under high vacuum until melting was observed. Magnesium turnings (182 mg, 7.5 mmol, 2.5 eq) and degassed THF (2.5 mL) were added and the magnesium was activated by treatment with diisobutylaluminium hydride (30  $\mu\text{L}$ , 30.0  $\mu\text{mol}$ , 0.01 eq, 1.0 M in THF). After stirring for 5 minutes at room temperature, 4-methoxybenzyl chloride (0.41 mL, 3.00 mmol, 1.0 eq) was added and the reaction mixture stirred for two hours at room temperature. The reaction solution was transferred into a syringe and filtrated through a preparative syringe filter into a new *Schlenk*-flask. The concentration of the organozinc solution was determined by iodometric titration ( $c = 0.82$  M).

#### Negishi-coupling<sup>[10]</sup>

To a solution of quinolone **S8** (34.4 mg, 0.1 mmol, 1.0 eq),  $\text{Pd}_2(\text{dba})_3$  (4.58 mg, 5.0  $\mu\text{mol}$ , 0.05 eq) and RuPhos-ligand (9.3 mg, 20.0  $\mu\text{mol}$ , 0.2 eq) in degassed *N,N*-dimethylacetamide (0.5 mL) was added (4-methoxybenzyl)zinc(II) chloride (0.37 mL, 0.30 mmol, 3.0 eq, 0.82 M in THF). The reaction was stirred at room temperature until TLC control (pentane/EtOAc = 1/1) showed complete conversion (20 hours). Saturated  $\text{NH}_4\text{Cl}$  solution (5 mL) and water

(5 mL) were added and the mixture was extracted with EtOAc ( $3 \times 10$  mL). The combined organic layers were successively washed with water ( $2 \times 10$  mL) and saturated NaCl solution ( $1 \times 10$  mL) and were dried over  $\text{Na}_2\text{SO}_4$ . The solvent was removed under reduced pressure and the crude product was subjected to flash column chromatography ( $\text{SiO}_2$ ,  $13 \times 1.5$  cm,  $\text{CH}_2\text{Cl}_2/\text{EtOAc}$  9/1, UV/CAM) to afford the title compound as a colorless solid (23.5 mg, 61%).

**m.p.:** 163-165 °C

**TLC:**  $R_f = 0.36$  ( $\text{CH}_2\text{Cl}_2/\text{MeOH} = 95/5$ ) [UV, CAM].

**IR** (ATR):  $\tilde{\nu}$  [ $\text{cm}^{-1}$ ] = 3136 (w), 3062 (w, CH), 3002 (w, CH), 2958 (w, CH), 2907 (w, CH), 2838 (w), 1648 (vs, C=O), 1609 (w, C=C), 1567 (m, C=C), 1509 (s, C=C), 1244 (s, C-O), 893 (m), 807 (m).

**$^1\text{H-NMR}$**  (500 MHz,  $\text{CDCl}_3$ ):  $\delta$  [ppm] = 3.75 (s, 3 H,  $\text{OCH}_3$ ), 3.79 (s, 3 H,  $\text{OCH}_3$ ), 3.93 (s, 2 H,  $\text{C}^3\text{-CH}_2$ ), 4.00 (s, 2 H,  $\text{C}^7\text{-CH}_2$ ), 6.82-6.85 (m, 2 H, 3''-H), 6.85-6.89 (m, 2 H, 3'-H), 6.95-6.99 (m, 1 H, 6-H), 7.09-7.13 (m, 2 H, 2''-H), 7.16 (s, 1 H, 8-H), 7.22-7.27 (m, 2 H, 2'-H), 7.34 (d,  $^3J = 8.1$  Hz, 1 H, 5-H), 7.38 (s, 1 H, 4-H), 11.84 (s, 1 H, NH).

**$^{13}\text{C-NMR}$**  (125.8 MHz,  $\text{CDCl}_3$ ):  $\delta$  [ppm] = 35.3 (t,  $\text{C}^3\text{-CH}_2$ ), 41.2 (t,  $\text{C}^7\text{-CH}_2$ ), 55.3 (q,  $\text{OCH}_3$ ), 55.4 (q,  $\text{OCH}_3$ ), 114.1 (d, C-3'), 114.1 (d, C-3''), 115.5 (d, C-8), 118.6 (s, C-4a), 123.7 (d, C-6), 127.5 (d, C-5), 130.1 (d, C-2''), 130.5 (d, C-2'), 131.3 (s, C-1'), 132.5 (s, C-1''), 133.1 (s, C-3), 137.2 (d, C-4), 137.8 (s, C-8a), 143.9 (s, C-7), 158.2 (s, C-4'), 158.2 (s, C-4''), 164.3 (s, C-2).

**HRMS** (ESI):  $\text{C}_{25}\text{H}_{24}\text{NO}_3$  [(M+H) $^+$ ]: calcd.: 386.1751; found: 386.1752

$\text{C}_{25}\text{H}_{23}\text{NNaO}_3$  [(M+Na) $^+$ ]: calcd.: 408.1570; found: 408.1571

$\text{C}_{50}\text{H}_{47}\text{N}_2\text{O}_6$  [(2M+H) $^+$ ]: calcd.: 771.3429; found: 771.3447.

## Rhodium-catalyzed C–H amination reactions

### (*R*)-2,2,2-Trichloroethyl ((4-methoxyphenyl)(2-oxo-1,2-dihydroquinolin-3-yl)methyl)sulfamate (**8**)

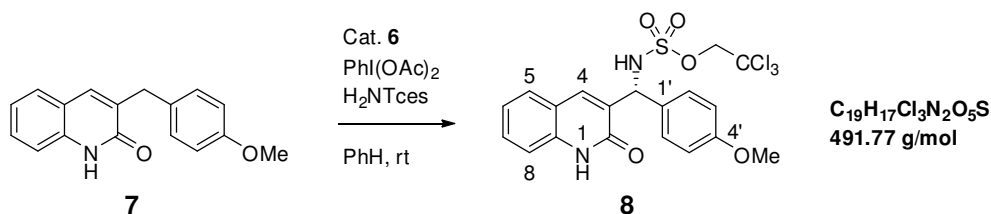

Following *GP4*, quinolone **7** (53.1 mg, 0.2 mmol, 2.0 eq) was reacted using catalyst **6** (2.21 mg, 2.0  $\mu\text{mol}$ , 0.02 eq) to afford the title compound as a colorless solid (25.8 mg, 52%, 71% *ee*) after purification by flash column chromatography ( $\text{SiO}_2$ ,  $15 \times 1.5$  cm,  $\text{CH}_2\text{Cl}_2/\text{EtOAc}$  98/2  $\rightarrow$  95/5  $\rightarrow$  9/1  $\rightarrow$  8/2, UV/CAM).

The enantiomers were separated by semipreparative HPLC chromatography on a chiral stationary phase (Daicel ChiralPak AD,  $250 \times 20$  mm, *n*-hexane/*i*-PrOH = 1:1). The absolute configuration of the separated major enantiomer (>99% *ee*, (–)-(*R*)-**8**) was determined by X-ray diffraction analysis of a single crystal, obtained by slow evaporation of a methanolic solution.

**m.p.:** 171–174 °C (decomposition)

**TLC:**  $R_f$  = 0.47 ( $\text{CH}_2\text{Cl}_2/\text{MeOH}$  = 95/5) [UV, CAM].

**Specific Rotation:** [>99% *ee*, determined by chiral HPLC]

$[\alpha]_D^{20} = -8.5$  ( $c$  = 0.33,  $\text{CHCl}_3$ ).

**HPLC** (AD-H,  $250 \times 4.6$  mm, *n*-hexane/*i*-PrOH = 50/50, 1 mL/min,  $\lambda$  = 210 nm):  $t_R$  [racemate] = 10.5 min ((–)-(*R*)-**8**), 12.3 min ((+)-(*S*)-**8**).

**IR** (ATR):  $\tilde{\nu}$  [ $\text{cm}^{-1}$ ] = 3007 (w, CH), 2947 (w, CH), 2839 (w), 2779 (w), 1651 (s, C=O), 1610 (m, C=C), 1570 (m, C=C), 1509 (m, C=C), 1421 (m), 1241 (m), 1174 (vs), 958 (s), 849 (vs), 824 (s).

**<sup>1</sup>H NMR** (500 MHz,  $\text{DMSO-d}_6$ ):  $\delta$  [ppm] = 3.72 (s, 3 H,  $\text{OCH}_3$ ), 4.59 (d,  $^2J$  = 11.1 Hz, 1 H,  $\text{OCH}_a\text{H}_b\text{CCl}_3$ ), 4.70 (d,  $^2J$  = 11.1 Hz, 1 H,  $\text{OCH}_a\text{H}_b\text{CCl}_3$ ), 5.82 (d,  $^3J$  = 8.2 Hz, 1 H,  $\text{CHNHTces}$ ), 6.89–6.93 (m, 2 H, 3'-H), 7.17–7.22 (m, 1 H, 6-H), 7.29–7.34 (m, 3 H, 2'-H, 8-H), 7.50 (ddd,  $^3J$  = 8.4 Hz,  $^3J$  = 7.2 Hz,  $^3J$  = 1.3 Hz, 1 H, 7-H), 7.68 (d,  $^3J$  = 7.3 Hz, 1 H, 5-H), 7.96 (s, 1 H, 4-H), 9.29 (d,  $^3J$  = 8.2 Hz, 1 H,  $\text{CHNHTces}$ ), 11.99 (s, 1 H, NH).

**<sup>13</sup>C-NMR** (125.8 MHz,  $\text{DMSO-d}_6$ ):  $\delta$  [ppm] = 55.2 (q,  $\text{OCH}_3$ ), 55.4 (d,  $\text{CHNHTces}$ ), 77.3 (t,



OCH<sub>2</sub>CCl<sub>3</sub>), 93.8 (s, OCH<sub>2</sub>CCl<sub>3</sub>), 113.8 (d, C-3'), 114.9 (d, C-8), 118.8 (s, C-4a), 122.1 (d, C-6), 128.1 (d, C-5), 128.7 (d, C-2'), 130.4 (d, C-7), 131.5 (s, C-1'), 132.9 (s, C-3), 136.1 (d, C-4), 138.0 (s, C-8a), 158.7 (s, C-4'), 160.6 (s, C-2).

**HRMS** (ESI): C<sub>19</sub>H<sub>18</sub>Cl<sub>3</sub>N<sub>2</sub>O<sub>5</sub>S [(M+H)<sup>+</sup>]: calcd.: 490.9997; found: 490.9999

C<sub>19</sub>H<sub>17</sub>Cl<sub>3</sub>N<sub>2</sub>NaO<sub>5</sub>S [(M+Na)<sup>+</sup>]: calcd.: 512.9816; found: 512.9819.

**2,2,2-Trichloroethyl ((4-methoxyphenyl)(1-methyl-2-oxo-1,2-dihydroquinolin-3-yl)methyl)sulfamate (13)**

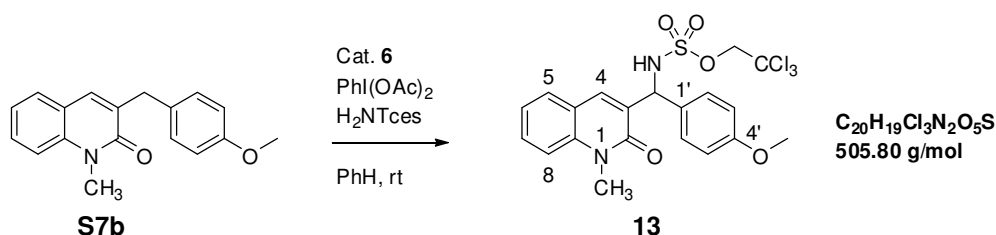

Following *GP4*, quinolone **S7b** (55.9 mg, 0.2 mmol, 2.0 eq) was reacted using catalyst **6** (2.21 mg, 2.0 μmol, 0.02 eq) to afford the title compound as a colorless solid (14.6 mg, 29%, 10% *ee*). The compound **13** was obtained after purification by flash column chromatography (SiO<sub>2</sub>, 15 × 1 cm, pentane/Et<sub>2</sub>O 1/1, UV/CAM) yielding a mixture of starting material **S7b** and **13**, which were then separated by further flash column chromatography (SiO<sub>2</sub>, 16 × 1 cm, CH<sub>2</sub>Cl<sub>2</sub> → CH<sub>2</sub>Cl<sub>2</sub>/EtOAc 98/2, UV/CAM).

**m.p.:** 125-127 °C (decomposition)

**TLC:** *R*<sub>f</sub> = 0.63 (CH<sub>2</sub>Cl<sub>2</sub>/MeOH 98/2) [UV, CAM].

**HPLC** (AD-H, 250 × 4.6 mm, *n*-hexane/*i*-PrOH = 50/50, 1 mL/min, λ = 210 nm): *t*<sub>R</sub> [racemate] = 10.3 min, 12.8 min.

**IR** (ATR):  $\tilde{\nu}$  [cm<sup>-1</sup>] = 3355 (m), 3193 (br), 2957 (s, CH), 2920 (vs, CH), 2850 (s, CH), 1640 (vs, C=O), 1586 (vs), 1511 (s, C=C), 1460 (s), 1258 (s), 1175 (vs), 849 (m), 752 (s), 722 (m).

**<sup>1</sup>H-NMR** (500 MHz, CDCl<sub>3</sub>): δ [ppm] = 3.71 (s, 3 H, NCH<sub>3</sub>), 3.77 (s, 3 H, OCH<sub>3</sub>), 4.47 (d, <sup>2</sup>*J* = 10.7 Hz, 1 H, OCH<sub>a</sub>H<sub>b</sub>CCl<sub>3</sub>), 4.51 (d, <sup>2</sup>*J* = 10.7 Hz, 1 H, OCH<sub>a</sub>H<sub>b</sub>CCl<sub>3</sub>), 5.66 (d, <sup>3</sup>*J* = 9.4 Hz, 1 H CHNHTces), 6.82-6.88 (m, 2 H, 3'-H), 7.30 (*virt. t.*, <sup>3</sup>*J* ≈ 7.5 Hz, 1 H, 6-H), 7.36-7.41 (m, 3 H, 2'-H, 8-H), 7.53 (d, <sup>3</sup>*J* = 9.4 Hz, 1 H, CHNH<sub>T</sub>ces), 7.59-7.65 (m, 2 H, 5-H, 7-H), 7.83 (s, 1 H, 4-H).

**<sup>13</sup>C-NMR** (125.8 MHz, CDCl<sub>3</sub>): δ [ppm] = 29.8 (q, NCH<sub>3</sub>), 55.4 (q, OCH<sub>3</sub>), 61.2 (d, CHNHTces), 78.1 (t, OCH<sub>2</sub>CCl<sub>3</sub>), 93.4 (s, OCH<sub>2</sub>CCl<sub>3</sub>), 114.2 (d, C-3'), 114.4 (d, C-8), 120.2

(s, C-4a), 123.1 (d, C-6), 127.8 (d, C-2'), 129.3 (d, C-5), 129.9 (s, C-3), 130.9 (s, C-1'), 131.2 (d, C-7), 137.7 (d, C-4), 139.5 (s, C-8a), 159.4 (s, C-4'), 161.5 (s, C-2).

**HRMS** (ESI):  $C_{20}H_{20}Cl_3N_2O_5S$  [(M+H)<sup>+</sup>]: calcd.: 505.0153; found: 505.0148  
 $C_{20}H_{19}Cl_3N_2NaO_5S$  [(M+Na)<sup>+</sup>]: calcd.: 526.9972; found: 526.9966  
 $C_{40}H_{39}Cl_6N_4O_{10}S_2$  [(2M+H)<sup>+</sup>]: calcd.: 1009.0233; found: 1009.0212.

**(R)-2,2,2-Trichloroethyl ((4-(*tert*-butoxy)phenyl)(2-oxo-1,2-dihydroquinolin-3-yl)methyl)sulfamate (11)**

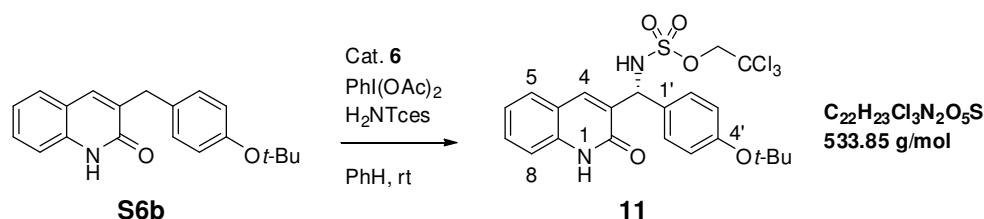

Following *GP4*, quinolone **S6b** (61.5 mg, 0.2 mmol, 2.0 eq) was reacted using catalyst **6** (2.21 mg, 2.0  $\mu$ mol, 0.02 eq) to afford the title compound as a colorless solid (20.2 mg, 38%, 49% *ee*) after purification by flash column chromatography (SiO<sub>2</sub>, 15  $\times$  1.5 cm, CH<sub>2</sub>Cl<sub>2</sub>/EtOAc 98/2  $\rightarrow$  95/5  $\rightarrow$  9/1  $\rightarrow$  4/1, UV/CAM).

**m.p.:** 168-170  $^{\circ}$ C (decomposition)

**TLC:**  $R_f$  = 0.42 (CH<sub>2</sub>Cl<sub>2</sub>/MeOH = 95/5) [UV, CAM].

**HPLC** (AD-H, 250  $\times$  4.6 mm, *n*-hexane/*i*-PrOH = 70/30, 1 mL/min,  $\lambda$  = 210 nm):  $t_R$  [racemate] = 10.2 min ((*R*)-**11**), 12.3 min ((*S*)-**11**).

**IR** (ATR):  $\tilde{\nu}$  [cm<sup>-1</sup>] = 2975 (w, CH), 2924 (w, CH), 2854 (w), 1656 (vs, C=O), 1608 (w, C=C), 1572 (m, C=C), 1505 (m, C=C), 1365 (m), 1242 (m), 1182 (s), 853 (s), 755 (m).

**<sup>1</sup>H-NMR** (500 MHz, CDCl<sub>3</sub>):  $\delta$  [ppm] = 1.31 (s, 9 H, C(CH<sub>3</sub>)<sub>3</sub>), 4.46 (d, <sup>2</sup>*J* = 10.7 Hz, 1 H OCH<sub>a</sub>H<sub>b</sub>CCl<sub>3</sub>), 4.49 (d, <sup>2</sup>*J* = 10.7 Hz, 1 H, OCH<sub>a</sub>H<sub>b</sub>CCl<sub>3</sub>), 5.69 (d, <sup>3</sup>*J* = 9.4 Hz, 1 H, CHNHTces), 6.92-6.96 (m, 2 H, 3'-H), 7.17 (d, <sup>3</sup>*J* = 8.2 Hz, 1 H, 8-H), 7.25-7.30 (m, 1 H, 6-H), 7.36-7.40 (m, 2 H, 2'-H), 7.51-7.55 (m, 1 H, 7-H), 7.59-7.62 (m, 1 H, 5-H), 7.67 (d, <sup>3</sup>*J* = 9.4 Hz, 1 H, CHNHTces), 7.89 (s, 1 H, 4-H), 10.52 (s, 1 H, NH).

**<sup>13</sup>C-NMR** (125.8 MHz, CDCl<sub>3</sub>):  $\delta$  [ppm] = 29.0 (q, C(CH<sub>3</sub>)<sub>3</sub>), 60.9 (d, CHNHTces), 78.1 (t, OCH<sub>2</sub>CCl<sub>3</sub>), 78.9 (s, C(CH<sub>3</sub>)<sub>3</sub>), 93.4 (s, OCH<sub>2</sub>CCl<sub>3</sub>), 115.5 (d, C-8), 119.8 (s, C-4a), 123.7 (d, C-6), 124.2 (d, C-3'), 127.4 (d, C-2'), 128.4 (d, C-5), 130.0 (s, C-3), 131.4 (d, C-7), 133.4 (s, C-1'), 137.5 (s, C-8a), 139.4 (d, C-4), 155.5 (s, C-4'), 162.6 (s, C-2).

**HRMS** (ESI):  $C_{22}H_{24}Cl_3N_2O_5S$  [(M+H)<sup>+</sup>]: calcd.: 533.0466; found: 533.0469  
 $C_{22}H_{23}Cl_3N_2NaO_5S$  [(M+Na)<sup>+</sup>]: calcd.: 555.0285; found: 555.0288  
 $C_{44}H_{47}Cl_6N_4O_{10}S_2$  [(2M+H)<sup>+</sup>]: calcd.: 1065.0859; found: 1065.0868.

**(R)-2,2,2-Trichloroethyl ((2-oxo-1,2-dihydroquinolin-3-yl)(4-((triisopropylsilyl)oxy)phenyl)methyl)sulfamate (12)**

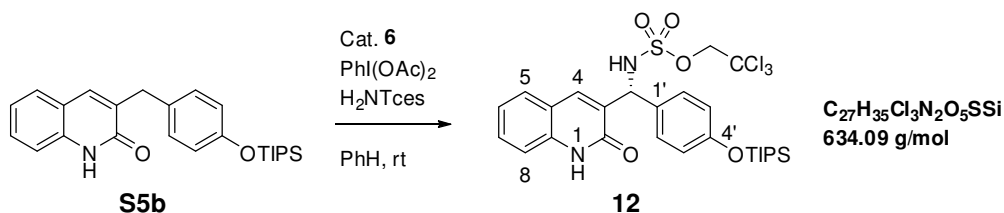

Following *GP4*, quinolone **S5b** (81.5 mg, 0.2 mmol, 2.0 eq) was reacted using catalyst **6** (2.21 mg, 2.0  $\mu$ mol, 0.02 eq) to afford a mixture of the title compound (24.9 mg<sup>\*</sup>, 39%<sup>\*</sup>, 72% *ee*) and H<sub>2</sub>NTces (**12**/H<sub>2</sub>NTces = 74/26) as a colorless solid after purification by flash column chromatography (SiO<sub>2</sub>, 16  $\times$  1 cm, CH<sub>2</sub>Cl<sub>2</sub>/EtOAc 99/1  $\rightarrow$  98/2  $\rightarrow$  95/5, UV/CAM). An analytically pure sample of **12** was obtained by repeated flash column chromatography and all analytical data refer to this sample.

\* corrected yield based on NMR-integration

**m.p.:** 163-165 °C (decomposition)

**TLC:** *R<sub>f</sub>* = 0.68 (CH<sub>2</sub>Cl<sub>2</sub>/MeOH = 95/5) [UV, CAM].

**Specific Rotation:** [72% *ee*, determined by chiral HPLC]

$[\alpha]_D^{20} = -10.3$  (*c* = 0.68, CHCl<sub>3</sub>).

**HPLC** (AS-RH, 150  $\times$  4.6 mm, CH<sub>3</sub>CN/H<sub>2</sub>O = 20/80  $\rightarrow$  100/0, 1 mL/min,  $\lambda$  = 254 nm): *t<sub>R</sub>* [racemate] = 23.5 min ((-)-(*R*)-**12**), 25.9 ((+)-(*S*)-**12**).

**IR** (ATR):  $\tilde{\nu}$  [cm<sup>-1</sup>] = 3301 (w, NH), 3158 (w), 3060 (CH), 2943 (m, CH), 2925 (m, CH), 2867 (m), 1651 (s, C=O), 1607 (m, C=C), 1570 (w, C=C), 1509 (m, C=C), 1267 (m), 1182 (m), 853 (w), 755 (w).

**<sup>1</sup>H-NMR** (500 MHz, CDCl<sub>3</sub>):  $\delta$  [ppm] = 1.06 (d, <sup>3</sup>*J* = 7.4 Hz, 18 H, Si(CH(CH<sub>3</sub>)<sub>2</sub>)<sub>3</sub>), 1.16-1.26 (m, 3 H, Si(CH(CH<sub>3</sub>)<sub>2</sub>)<sub>3</sub>), 4.45 (d, <sup>2</sup>*J* = 10.8 Hz, 1 H, OCH<sub>a</sub>H<sub>b</sub>CCl<sub>3</sub>), 4.50 (d, <sup>2</sup>*J* = 10.8 Hz, 1 H, OCH<sub>a</sub>H<sub>b</sub>CCl<sub>3</sub>), 5.67 (d, <sup>3</sup>*J* = 9.3 Hz, 1 H, CHNHTces), 6.79-6.83 (m, 2 H, 3'-H), 7.14 (d, <sup>3</sup>*J* = 8.2 Hz, 1 H, 8-H), 7.24-7.29 (m, 1 H, 6-H), 7.30-7.34 (m, 2 H, 2'-H), 7.50-7.55 (m, 1 H, 7-H), 7.57-7.61 (m, 2 H, 5-H, CHNHTces), 7.87 (s, 1 H, 4-H), 10.74 (s, 1 H,

NH).

**$^{13}\text{C}$ -NMR** (125.8 MHz,  $\text{CDCl}_3$ ):  $\delta$  [ppm] = 12.8 (d,  $\text{Si}(\underline{\text{CH}}(\text{CH}_3)_2)_3$ ), 18.0 (q,  $\text{Si}(\text{CH}(\underline{\text{CH}}_3)_2)_3$ ), 60.8 (d,  $\underline{\text{CHNHTces}}$ ), 78.1 (t,  $\text{O}\underline{\text{CH}_2}\text{CCl}_3$ ), 93.4 (s,  $\text{OCH}_2\underline{\text{CCl}_3}$ ), 115.5 (d, C-8), 119.8 (s, C-4a), 120.1 (d, C-3'), 123.6 (d, C-6), 127.9 (d, C-2'), 128.3 (d, C-5), 130.1 (s, C-3), 131.1 (s, C-1'), 131.3 (d, C-7), 137.5 (s, C-8a), 139.3 (d, C-4), 156.1 (s, C-4'), 162.7 (s, C-2).

**HRMS** (ESI):  $\text{C}_{27}\text{H}_{36}\text{Cl}_3\text{N}_2\text{O}_5\text{SSi}$  [(M+H) $^+$ ]: calcd.: 633.1174; found: 633.1178

$\text{C}_{54}\text{H}_{71}\text{Cl}_6\text{N}_4\text{O}_{10}\text{S}_2\text{Si}_2$  [(2M+H) $^+$ ]: calcd.: 1265.2276; found: 1265.2288.

**(*R*)-2,2,2-Trichloroethyl ((4-(octyloxy)phenyl)(2-oxo-1,2-dihydroquinolin-3-yl)methyl)sulfamate (10)**

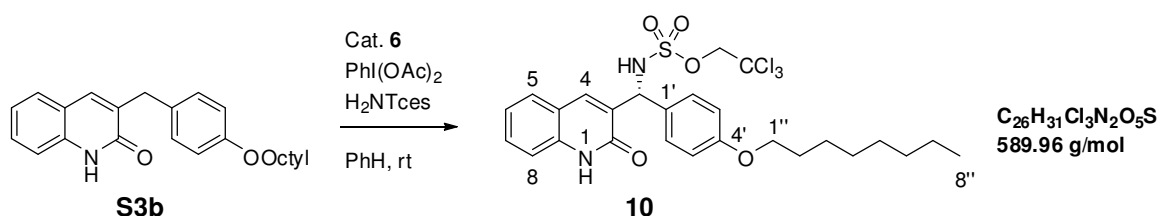

Following *GP4*, quinolone **S3b** (72.7 mg, 0.2 mmol, 2.0 eq) was reacted using catalyst **6** (2.21 mg, 2.0  $\mu\text{mol}$ , 0.02 eq) to afford the title compound as a colorless solid (9.0 mg, 15%, 75% *ee*) after purification by flash column chromatography ( $\text{SiO}_2$ ,  $15 \times 1.5$  cm,  $\text{CH}_2\text{Cl}_2/\text{EtOAc}$  99/1  $\rightarrow$  98/2  $\rightarrow$  9/1  $\rightarrow$  4/1, UV/CAM).

**m.p.:** 156-158  $^\circ\text{C}$  (decomposition)

**TLC:**  $R_f$  = 0.64 ( $\text{CH}_2\text{Cl}_2/\text{MeOH}$  = 95/5) [UV, CAM].

**Specific Rotation:** [75% *ee*, determined by chiral HPLC]

$[\alpha]_D^{20} = -3.5$  ( $c$  = 0.31,  $\text{CHCl}_3$ ).

**HPLC** (AD-H,  $250 \times 4.6$  mm, *n*-hexane/*i*-PrOH = 70/30, 1 mL/min,  $\lambda$  = 210 nm):  $t_R$  [racemate] = 12.3 min ((-)-(*R*)-**10**), 17.6 min ((+)-(*S*)-**10**).

**IR** (ATR):  $\tilde{\nu}$  [ $\text{cm}^{-1}$ ] = 3283 (w, NH), 3021 (w, CH), 2923 (w, CH), 2855 (w), 1658 (s, C=O), 1611 (m, C=C), 1574 (m, C=C), 1510 (m, C=C), 1435 (m), 1248 (s), 1174 (vs), 958 (s), 851 (s).

**$^1\text{H}$ -NMR** (500 MHz,  $\text{CDCl}_3$ ):  $\delta$  [ppm] = 0.88 (t,  $^3J$  = 6.8 Hz, 3 H, 8''-H), 1.22-1.36 (m, 8 H, 4''-H, 5''-H, 6''-H, 7''-H), 1.37-1.45 (m, 2 H, 3''-H), 1.70-1.77 (m, 2 H, 2''-H), 3.87-3.91 (m, 2 H, 1''-H), 4.46 (d,  $^2J$  = 10.8 Hz, 1 H,  $\text{OCH}_a\text{H}_b\text{CCl}_3$ ), 4.51 (d,  $^2J$  = 10.8 Hz, 1 H,  $\text{OCH}_a\text{H}_b\text{CCl}_3$ ), 5.70 (d,  $^3J$  = 9.3 Hz, 1 H,  $\text{CHNHTces}$ ), 6.81-6.85 (m, 2 H, 3'-H), 7.13 (d,  $^3J$  =

8.4 Hz, 1 H, 8-H), 7.24-7.29 (m, 1 H, 6-H), 7.36-7.41 (m, 2 H, 2'-H), 7.51 (ddd,  $^3J = 8.4$  Hz,  $^3J = 7.2$  Hz,  $^4J = 1.3$  Hz, 1 H, 7-H), 7.58-7.61 (m, 1 H, 5-H), 7.63 (d,  $^3J = 9.3$  Hz, 1 H, CHNHTces), 7.89 (s, 1 H, 4-H), 11.15 (s, 1 H, NH).

$^{13}\text{C-NMR}$  (125.8 MHz,  $\text{CDCl}_3$ ):  $\delta$  [ppm] = 14.3 (q, C-8''), 22.8 (t,  $\text{CH}_2$ ), 26.2 (t, C-3'), 29.3, 29.4, 29.5 (3 t, C-2'', 2  $\text{CH}_2$ ), 32.0 (t,  $\text{CH}_2$ ), 60.7 (d, CHNHTces), 68.2 (t, C-1'), 78.1 (t,  $\text{OCH}_2\text{CCl}_3$ ), 93.4 (s,  $\text{OCH}_2\text{CCl}_3$ ), 114.7 (d, C-3'), 115.7 (d, C-8), 119.8 (s, C-4a), 123.6 (d, C-6), 127.9 (d, C-2'), 128.3 (d, C-5), 130.0 (s, C-3), 130.6 (s, C-1'), 131.3 (d, C-7), 137.6 (s, C-8a), 139.4 (d, C-4), 159.1 (s, C-4'), 163.0 (s, C-2).

**HRMS** (ESI):  $\text{C}_{26}\text{H}_{32}\text{Cl}_3\text{N}_2\text{O}_5\text{S}$  [(M+H) $^+$ ]: calcd.: 589.1092; found: 589.1096

$\text{C}_{26}\text{H}_{31}\text{Cl}_3\text{N}_2\text{NaO}_5\text{S}$  [(M+Na) $^+$ ]: calcd.: 611.0911; found: 611.0916.

**(R)-2,2,2-Trichloroethyl ((2-oxo-1,2-dihydroquinolin-3-yl)(p-tolyl)methyl)sulfamate (9)**

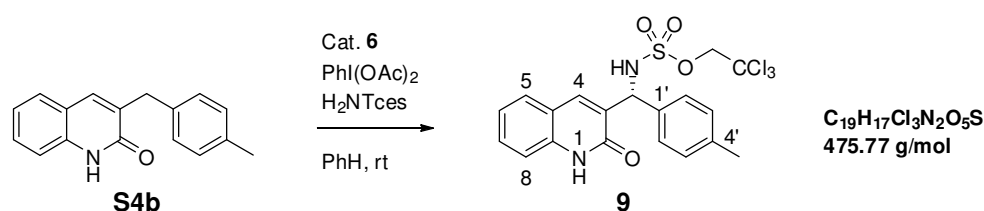

Following *GP4*, quinolone **S4b** (49.9 mg, 0.2 mmol, 2.0 eq) was reacted using catalyst **6** (2.21 mg, 2.0  $\mu\text{mol}$ , 0.02 eq) to afford a mixture of the title compound (12.5 mg $^*$ , 26% $^*$ , 48% *ee*) and  $\text{H}_2\text{NTces}$  (**12**/ $\text{H}_2\text{NTces}$  = 79/21) as a colorless solid after purification by flash column chromatography ( $\text{SiO}_2$ ,  $15 \times 1.5$  cm,  $\text{CH}_2\text{Cl}_2/\text{EtOAc}$  98/2  $\rightarrow$  95/5  $\rightarrow$  9/1  $\rightarrow$  4/1, UV/CAM). An analytically pure sample of **9** was obtained by repeated flash column chromatography and all analytical data refer to this sample.

$^*$  corrected yield based on NMR integration

**m.p.:** 168-169  $^\circ\text{C}$  (decomposition)

**TLC:**  $R_f = 0.54$  ( $\text{CH}_2\text{Cl}_2/\text{MeOH}$  95/5) [UV, CAM].

**Specific Rotation:** [48% *ee*, determined by chiral HPLC]

$[\alpha]_D^{20} = -2.1$  ( $c = 0.38$ ,  $\text{CHCl}_3$ ).

**HPLC** (AD-H,  $250 \times 4.6$  mm, *n*-hexane/*i*-PrOH = 70/30, 1 mL/min,  $\lambda = 210$  nm):  $t_R$  [racemate] = 15.5 min ((-)-(*R*)-**9**), 17.6 min ((+)-(*S*)-**9**).

**IR** (ATR):  $\tilde{\nu}$  [ $\text{cm}^{-1}$ ] = 3292 (w, NH), 3018 (w, CH), 2848 (w), 1652 (vs, C=O), 1619 (w, C=C), 1571 (m, C=C), 1434 (s), 1365 (s), 1178 (vs), 958 (s), 815 (s).

**<sup>1</sup>H-NMR** (500 MHz, CDCl<sub>3</sub>): δ [ppm] = 2.30 (s, 3 H, CH<sub>3</sub>), 4.46 (d, <sup>2</sup>J = 10.8 Hz, OCH<sub>a</sub>H<sub>b</sub>CCl<sub>3</sub>), 4.51 (d, <sup>2</sup>J = 10.8 Hz, 1 H, OCH<sub>a</sub>H<sub>b</sub>CCl<sub>3</sub>), 5.72 (d, <sup>3</sup>J = 9.3 Hz, 1 H, CHNHTces), 7.10-7.15 (m, 3 H, 3'-H, 8-H), 7.25-7.29 (m, 1 H, 6-H), 7.35-7.39 (m, 2 H, 2'-H), 7.48-7.53 (m, 1 H, 7-H), 7.59-7.62 (m, 1 H, 5-H), 7.70 (d, <sup>3</sup>J = 9.3 Hz, 1 H, CHNHTces), 7.92 (s, 1 H, 4-H), 11.46 (s, 1 H, NH).

**<sup>13</sup>C-NMR** (90.6 MHz, CDCl<sub>3</sub>): δ [ppm] = 21.2 (q, CH<sub>3</sub>), 60.9 (d, CHNHTces), 78.1 (t, OCH<sub>2</sub>CCl<sub>3</sub>), 93.4 (s, OCH<sub>2</sub>CCl<sub>3</sub>), 115.8 (d, C-8), 119.8 (s, C-4a), 123.6 (d, C-6), 126.6 (d, C-2'), 128.3 (d, C-5), 129.5 (d, C-3'), 129.9 (s, C-3), 131.3 (d, C-7), 135.8 (s, C-1'), 137.6 (s, C-8a), 138.0 (s, C-4'), 139.5 (d, C-4), 163.1 (s, C-2).

**HRMS** (ESI): C<sub>19</sub>H<sub>18</sub>Cl<sub>3</sub>N<sub>2</sub>O<sub>4</sub>S [(M+H)<sup>+</sup>]: calcd.: 475.0047; found: 475.0044.

### 2,2,2-Trichloroethyl (1-(4-methoxyphenyl)-2-(2-oxo-1,2-dihydroquinolin-3-yl)ethyl)sulfamate (14)

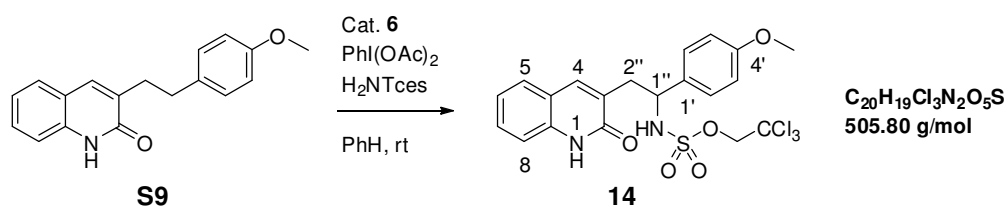

Following *GP4*, quinolone **S9** (55.9 mg, 0.2 mmol, 2.0 eq) was reacted using catalyst **6** (2.21 mg, 2.0 μmol, 0.02 eq) to afford the title compound as a colorless solid (32.7 mg, 65%, 30% *ee*) after purification by flash column chromatography (SiO<sub>2</sub>, 17 × 1 cm, CH<sub>2</sub>Cl<sub>2</sub>/EtOAc 9/1, UV/CAM).

**m.p.:** 184-186 °C (decomposition)

**TLC:** *R<sub>f</sub>* = 0.70 (CH<sub>2</sub>Cl<sub>2</sub>/MeOH 9/1) [UV, CAM].

**Specific Rotation:** [30% *ee*, determined by chiral HPLC]

[α]<sub>D</sub><sup>20</sup> = + 10.0 (*c* = 0.24, MeOH).

**HPLC** (OD, 250 × 4.6 mm, *n*-hexane/*i*-PrOH = 80/20, 1 mL/min, λ = 210 nm): *t<sub>R</sub>* [enantioenriched] = 11.3 min ((-)-**14**), 14.5 min ((+)-**14**).

**IR** (ATR):  $\tilde{\nu}$  [cm<sup>-1</sup>] = 3319 (m, NH), 3154 (w), 3103 (w, CH), 3064 (w, CH), 3005 (w, CH), 2948 (w, CH), 2898 (m, CH), 1654 (s, C=O), 1612 (m, C=C), 1574 (m, C=C), 1512 (m, C=C), 1247 (m), 1174 (s), 851 (m), 754 (m).

**<sup>1</sup>H-NMR** (500 MHz, DMSO-*d*<sub>6</sub>): δ [ppm] = 2.87-2.98 (m, 2 H, 2''-H), 3.71 (s, 3 H, OCH<sub>3</sub>),

4.15 (d,  $^2J = 11.1$  Hz, 1 H,  $\text{OCH}_a\text{H}_b\text{CCl}_3$ ), 4.20 (d,  $^2J = 11.1$  Hz, 1 H,  $\text{OCH}_a\text{H}_b\text{CCl}_3$ ), 4.79-4.86 (m, 1 H, 1''-H), 6.88-6.93 (m, 2 H, 3'-H), 7.14 (virt. t,  $^3J \approx 7.5$  Hz, 1 H, 6-H), 7.26-7.29 (m, 1 H, 8-H), 7.29-7.33 (m, 2 H, 2'-H), 7.44 (virt. t,  $^3J \approx 7.7$  Hz, 1 H, 7-H), 7.56 (d,  $^3J = 7.8$  Hz, 1 H, 5-H), 7.70 (s, 1 H, 4-H), 9.05 (d,  $^3J = 8.5$  Hz, 1 H,  $\text{NHTces}$ ), 11.86 (s, 1 H, NH).

$^{13}\text{C}$ -NMR (125.8 MHz,  $\text{DMSO-d}_6$ ):  $\delta$  [ppm] = 38.6 (t, C-2''), 55.1 (q,  $\text{OCH}_3$ ), 56.3 (d, C-1''), 77.0 (t,  $\text{OCH}_2\text{CCl}_3$ ), 93.5 (s,  $\text{OCH}_2\text{CCl}_3$ ), 113.9 (d, C-3'), 114.9 (d, C-8), 119.2 (s, C-4a), 121.9 (d, C-6), 127.4 (d, C-5), 127.7 (d, C-2'), 129.3 (s, C-3), 129.7 (d, C-7), 134.0 (s, C-1'), 138.2 (s, C-8a), 138.6 (d, C-4), 158.6 (s, C-4'), 162.1 (s, C-2).

HRMS (ESI):  $\text{C}_{20}\text{H}_{20}\text{Cl}_3\text{N}_2\text{O}_5\text{S}$  [(M+H) $^+$ ]: calcd.: 505.0153; found: 505.0152.

### 2,2,2-Trichloroethyl (1-(4-methoxyphenyl)-3-(2-oxo-1,2-dihydroquinolin-3-yl)propyl)sulfamate (15)

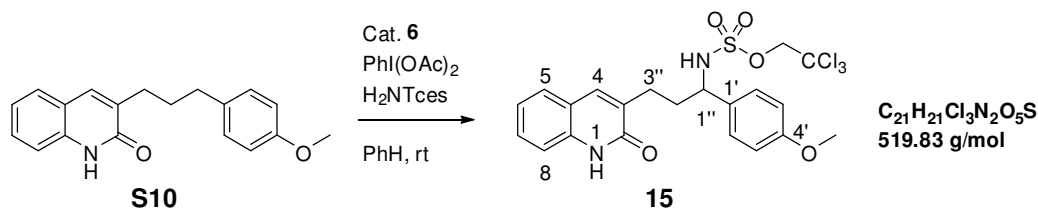

Following *GP4*, quinolone **S10** (58.7 mg, 0.2 mmol, 2.0 eq) was reacted using catalyst **6** (2.21 mg, 2.0  $\mu\text{mol}$ , 0.02 eq) to afford the title compound as a colorless solid (13.0 mg, 25%, 5% *ee*). The compound **15** was obtained after purification by flash column chromatography ( $\text{SiO}_2$ ,  $16 \times 1$  cm,  $\text{CH}_2\text{Cl}_2/\text{EtOAc}$  98/2  $\rightarrow$  9/1  $\rightarrow$  4/1, UV/CAM) yielding a compound mixture which was purified by further flash column chromatography ( $\text{SiO}_2$ ,  $18 \times 1$  cm  $\text{CH}_2\text{Cl}_2/\text{MeOH}$  99/1, UV/CAM).

**m.p.:** 153-155  $^\circ\text{C}$  (decomposition)

**TLC:**  $R_f = 0.58$  ( $\text{CH}_2\text{Cl}_2/\text{MeOH} = 9/1$ ) [UV, CAM].

**HPLC** (AD-H,  $250 \times 4.6$  mm, *n*-hexane/*i*-PrOH = 50/50, 1 mL/min,  $\lambda = 210$  nm):  $t_R$  [racemate] = 13.3 min, 15.2 min.

**IR** (ATR):  $\tilde{\nu}$  [ $\text{cm}^{-1}$ ] = 3305 (w, NH), 3277 (w), 3161 (w), 3108 (w), 3065 (w, CH), 2952 (w, CH), 2918 (w, CH), 2850 (w, CH), 1648 (vs, C=O), 1611 (m, C=C), 1574 (m, C=C), 1514 (m, C=C), 1426 (m), 1250 (m), 1174 (s), 753 (m).

**<sup>1</sup>H-NMR** (500 MHz, CDCl<sub>3</sub>): δ [ppm] = 2.24-2.40 (m, 2 H, 2''-H), 2.61-2.71 (m, 1 H, 3''-H<sub>a</sub>), 2.71-2.80 (m, 1 H, 3''-H<sub>b</sub>), 3.77 (s, 3 H, OCH<sub>3</sub>), 4.21 (d, <sup>2</sup>J = 10.8 Hz, 1 H, OCH<sub>a</sub>H<sub>b</sub>CCl<sub>3</sub>), 4.33 (d, <sup>3</sup>J = 10.8 Hz, 1 H, OCH<sub>a</sub>H<sub>b</sub>CCl<sub>3</sub>), 4.55-4.62 (m, 1 H, 1''-H), 6.86-6.90 (m, 2 H, 3'-H), 7.19-7.23 (m, 1 H, 6-H), 7.29 (d, <sup>3</sup>J = 8.3 Hz, 1 H, 8-H), 7.38-7.42 (m, 2 H, 2'-H), 7.46 (ddd, <sup>3</sup>J = 8.3 Hz, <sup>3</sup>J = 7.3 Hz, <sup>4</sup>J = 1.2 Hz, 1 H, 7-H), 7.49-7.52 (m, 1 H, 5-H), 7.64 (s, 1 H, 4-H), 8.51 (d, <sup>3</sup>J = 6.1 Hz, 1 H, NHTces), 10.91 (s, 1 H, NH).

**<sup>13</sup>C-NMR** (125.8 MHz, CDCl<sub>3</sub>): δ [ppm] = 29.0 (t, C-3''), 35.8 (t, C-2''), 55.5 (q, OCH<sub>3</sub>), 59.1 (d, C-1''), 78.0 (t, OCH<sub>2</sub>CCl<sub>3</sub>), 93.6 (s, OCH<sub>2</sub>CCl<sub>3</sub>), 114.4 (d, C-3'), 115.7 (d, C-8), 120.4 (s, C-4a), 123.2 (d, C-6), 127.4 (d, C-5), 128.2 (d, C-2'), 130.1 (d, C-7), 132.7 (s, C-3), 133.3 (s, C-1'), 137.1 (s, C-8a), 138.4 (d, C-4), 159.4 (s, C-4'), 163.7 (s, C-2).

**HRMS** (ESI): C<sub>21</sub>H<sub>22</sub>Cl<sub>3</sub>N<sub>2</sub>O<sub>5</sub>S [(M+H)<sup>+</sup>]: calcd.: 519.0310; found: 519.0312  
C<sub>21</sub>H<sub>21</sub>Cl<sub>3</sub>N<sub>2</sub>NaO<sub>5</sub>S [(M+Na)<sup>+</sup>]: calcd.: 541.0129; found: 541.0133  
C<sub>42</sub>H<sub>43</sub>Cl<sub>6</sub>N<sub>4</sub>O<sub>10</sub>S<sub>2</sub> [(2M+H)<sup>+</sup>]: calcd.: 1037.0546; found: 1037.0546.



## Competition experiment

**(*R*)-2,2,2-Trichloroethyl ((7-(4-methoxybenzyl)-2-oxo-1,2-dihydroquinolin-3-yl)(4-methoxyphenyl)methyl)sulfamate (18) and 2,2,2-Trichloroethyl ((3-(4-methoxybenzyl)-2-oxo-1,2-dihydroquinolin-7-yl)(4-methoxyphenyl)methyl)sulfamate (17)**

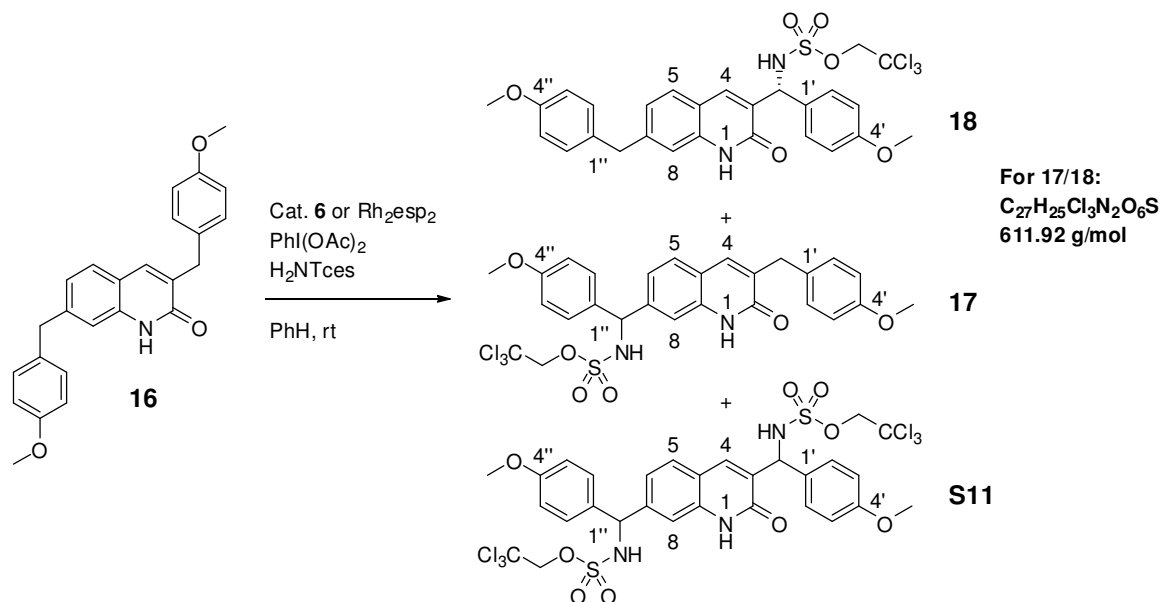

### *Racemic reaction with Rh<sub>2</sub>esp<sub>2</sub><sup>[1]</sup> as catalyst*

Following *GP4*, quinolone **16** (38.8 mg, 0.1 mmol, 1.0 eq) was reacted using Rh<sub>2</sub>esp<sub>2</sub> (1.52 mg, 2.0 μmol, 0.02 eq) as catalyst. After the given reaction time, the solvent was removed under reduced pressure and the crude product directly subject to <sup>1</sup>H NMR analysis. The crude product was then purified by flash column chromatography (SiO<sub>2</sub>, 18 × 1 cm, CH<sub>2</sub>Cl<sub>2</sub>/EtOAc 95/5 → 9/1 → 4/1, UV/CAM) to afford an analytically pure fraction of compound **18** as a colorless solid. Two further fractions were obtained consisting of a mixture of starting material **16** and minor amounts of **S11**<sup>\*</sup> and a mixture of **16** and **17**. The latter was purified by further flash column chromatography (SiO<sub>2</sub>, 14 × 1 cm CH<sub>2</sub>Cl<sub>2</sub>/MeOH 75/1, UV/CAM) to afford an analytically pure fraction of **17**. No improvement of purification was achieved by using preparative HPLC. The provided analytical data refer to the corresponding pure fractions obtained. The ratio of regioisomers **17** and **18** (**17/18** = 61/39) was calculated from the crude <sup>1</sup>H NMR by integration of the corresponding CH-signals (figure F1). For the determination of the right integral of **18**, the total integral of the CH-signal of **18** and one CH-signal of **S11** was determined (overlapping signals) and the integral of the second CH-proton of **S11** was subtracted.



Analytical data for compound **18**

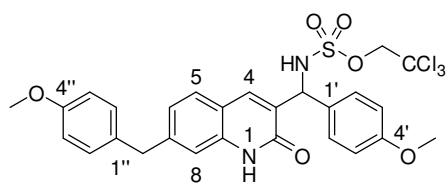

**m.p.:** 152-154 °C (decomposition)

**TLC:**  $R_f = 0.55$  ( $\text{CH}_2\text{Cl}_2/\text{MeOH}$  95/5) [UV, CAM].

**Specific Rotation:** [69% *ee*, determined by chiral HPLC]

$[\alpha]_D^{20} = -1.9$  ( $c = 0.69$ ,  $\text{CHCl}_3$ ).

**HPLC** (AD-H,  $250 \times 4.6$  mm,  $n$ -hexane/*i*-PrOH = 50/50, 1 mL/min,  $\lambda = 254$  nm):  $t_R$  [racemate] = 15.9 min ((-)-(*R*)-**18**), 23.9 min ((+)-(*S*)-**18**).

**IR** (ATR):  $\tilde{\nu}$  [ $\text{cm}^{-1}$ ] = 3299 (br, NH), 3143 (br, NH), 3065 (w), 3002 (w, CH), 2954 (m, CH), 2923 (s, CH), 2850 (m, CH), 1648 (vs, C=O), 1610 (m, C=C), 1568 (w, C=C), 1509 (vs, C=C), 1439 (m), 1247 (s), 1175 (s), 847 (m), 753 (m).

**$^1\text{H-NMR}$**  (500 MHz,  $\text{CDCl}_3$ ):  $\delta$  [ppm] = 3.75 (s, 3 H,  $\text{C}^{4'}\text{-OCH}_3$ ), 3.78 (s, 3 H,  $\text{C}^{4''}\text{-OCH}_3$ ), 4.00 (s, 2 H,  $\text{C}^7\text{-CH}_2$ ), 4.45 (d,  $^2J = 10.8$  Hz, 1 H,  $\text{OCH}_a\text{H}_b\text{CCl}_3$ ), 4.50 (d,  $^2J = 10.8$  Hz, 1 H,  $\text{OCH}_a\text{H}_b\text{CCl}_3$ ), 5.65 (d,  $^3J = 9.2$  Hz, 1 H,  $\text{CHNHTces}$ ), 6.81-6.84 (m, 2 H, 3'-H), 6.84-6.87 (m, 2 H, 3''-H), 6.96 (s, 1 H, 8-H), 7.07-7.11 (m, 3 H, 2''-H, 6-H), 7.37 (d,  $^3J = 8.4$  Hz, 2 H, 2'-H), 7.50 (d,  $^3J = 8.1$  Hz, 2 H, 5-H), 7.63 (d,  $^3J = 9.2$  Hz, 1 H,  $\text{CHNH}\underline{\text{Tces}}$ ), 7.83 (s, 1 H, 4-H), 10.48 (s, 1 H, NH).

**$^{13}\text{C-NMR}$**  (125.8 MHz,  $\text{CDCl}_3$ ):  $\delta$  [ppm] = 41.2 (t,  $\text{C}^7\text{-CH}_2$ ), 55.4, 55.4 (2 q,  $\text{C}^{4'}\text{-OCH}_3$ ,  $\text{C}^{4''}\text{-OCH}_3$ ), 60.8 (d,  $\text{CHNHTces}$ ), 78.1 (t,  $\text{OCH}_2\text{CCl}_3$ ), 93.4 (s,  $\text{OCH}_2\text{CCl}_3$ ), 114.2, 114.3 (2 d, C-3', C-3''), 115.2 (d, C-8), 118.0 (s, C-4a), 124.8 (d, C-6), 128.0 (d, C-2'), 128.4 (d, C-5), 129.2 (s, C-3), 130.1 (d, C-2''), 131.0 (s, C-1'), 131.8 (s, C-1''), 137.8 (s, C-8a), 139.1 (d, C-4), 146.0 (s, C-7), 158.4 (s, C-4''), 159.4 (s, C-4'), 162.7 (s, C-2).

**HRMS** (ESI):  $\text{C}_{27}\text{H}_{26}\text{Cl}_3\text{N}_2\text{O}_6\text{S}$  [(M+H) $^+$ ]: calcd.: 611.0572; found: 611.0575

$\text{C}_{27}\text{H}_{25}\text{Cl}_3\text{N}_2\text{NaO}_6\text{S}$  [(M+Na) $^+$ ]: calcd.: 633.0391; found: 633.0340.

a) Compound **18**

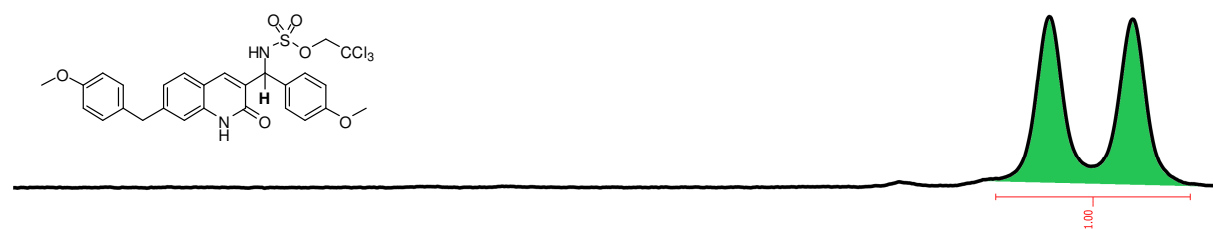

b) Compound **17**

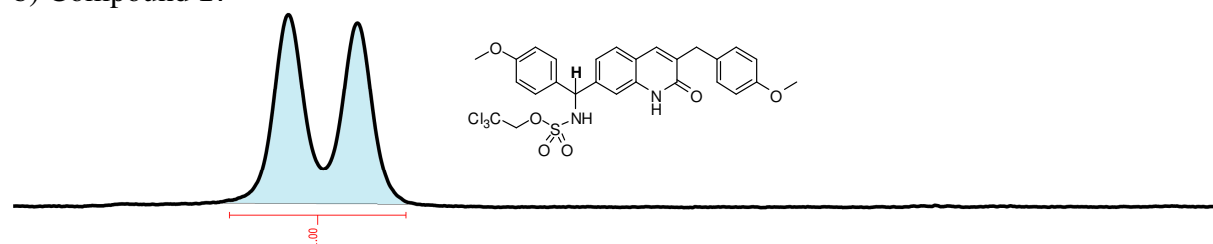

c) Compound **S11**

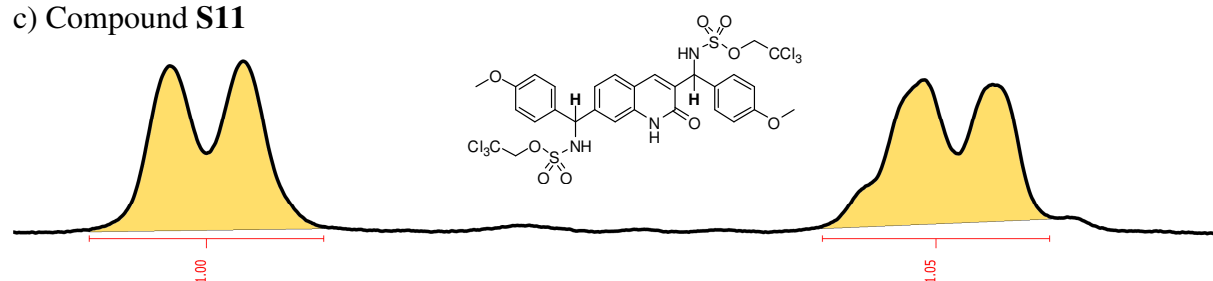

d) CH-amination using Rh<sub>2</sub>esp<sub>2</sub> as catalyst

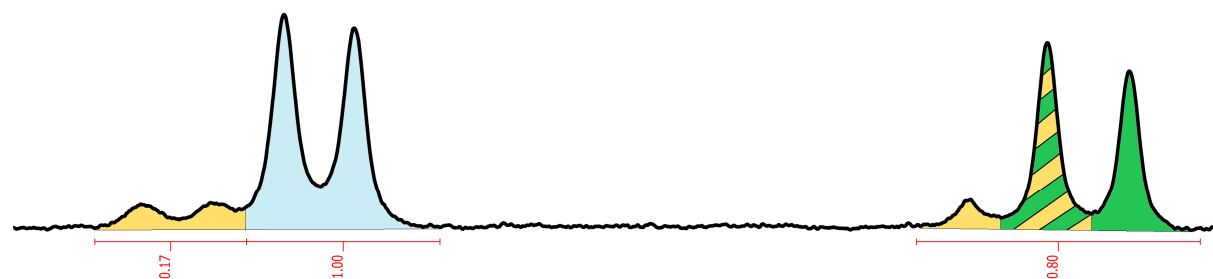

e) CH-amination using **6** as catalyst

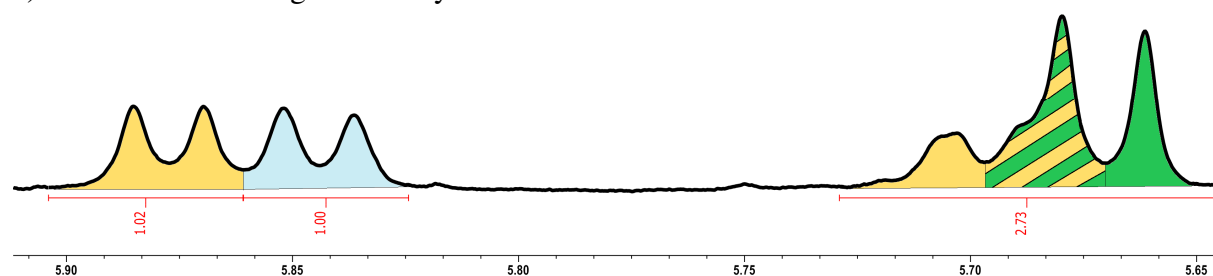

**Figure F1:** Determination of the ratio of regioisomers **18** and **17**. <sup>1</sup>H NMR spectra (500 MHz, CDCl<sub>3</sub>): a) compound **18**; b) compound **17**; c) isolated compound **S11** for comparison; d) crude product using Rh<sub>2</sub>esp<sub>2</sub> as amination-catalyst; e) crude product using **6** as amination-catalyst.

## Deprotection of CH-amination product *rac*-**8**<sup>[11]</sup>

### 3-(Amino(4-methoxyphenyl)methyl)quinolin-2(1*H*)-one (*rac*-**S12**)

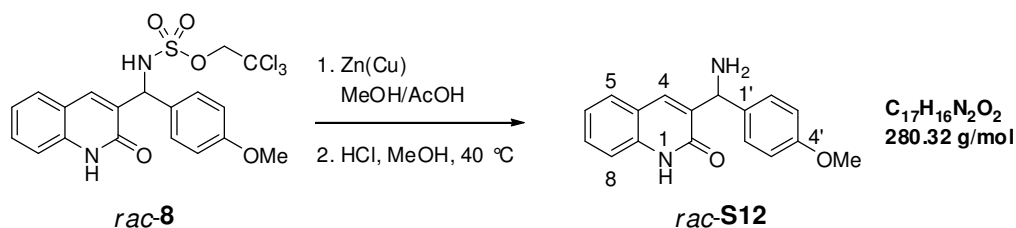

To a solution of **8** (24.6 mg, 0.05 mmol, 1.0 eq) in methanol (0.7 mL) was successively added zinc-copper couple (32.7 mg, 0.5 mmol, 10 eq) and acetic acid (0.7 mL). The reaction mixture was stirred for 20 hours at room temperature and then was filtered through a pad of Celite. The Celite was rinsed with methanol and the filtrate was concentrated under reduced pressure. The remaining acetic acid was removed by repeated evaporation with toluene under reduced pressure. The residue was dissolved in a solution of HCl in methanol (2 mL, prepared by adding 160  $\mu$ L acetyl chloride to 2 mL of dry methanol) and the reaction mixture was stirred at 40 °C for 18 hours. The reaction was quenched by the addition of saturated K<sub>2</sub>CO<sub>3</sub> solution followed by extraction with dichloromethane (3  $\times$  8 mL). The combined organic layers were dried over Na<sub>2</sub>SO<sub>4</sub> and the solvent was removed under reduced pressure. The crude product was subjected to flash column chromatography (SiO<sub>2</sub>, 10  $\times$  1 cm, CH<sub>2</sub>Cl<sub>2</sub>/MeOH 98/2  $\rightarrow$  95/5  $\rightarrow$  9/1, UV) to afford the amine *rac*-**S12** as a colorless solid (9.4 mg, 67%).

**m.p.:** 159-162 °C

**TLC:** *R<sub>f</sub>* = 0.24 (CH<sub>2</sub>Cl<sub>2</sub>/MeOH = 4/1) [UV].

**IR** (ATR):  $\tilde{\nu}$  [cm<sup>-1</sup>] = 3351 (w, NH), 3275 (w), 2994 (m, CH), 2923 (m, CH), 2849 (m, CH), 1649 (s, C=O), 1609 (m, C=C), 1567 (m, C=C), 1510 (m, C=C), 1432 (m), 1248 (s), 1179 (w), 917 (w), 754 (m).

**<sup>1</sup>H-NMR** (500 MHz, CDCl<sub>3</sub>):  $\delta$  [ppm] = 2.08 (bs, 2 H, NH<sub>2</sub>), 3.79 (s, 3 H, OCH<sub>3</sub>), 5.44 (s, 1 H, CHNH<sub>2</sub>), 6.88 (d, <sup>3</sup>*J* = 8.2 Hz, 2 H, 3'-H), 7.15-7.23 (m, 2 H, 6-H, 8-H), 7.40-7.46 (m, 3 H, 7-H, 2'-H), 7.50 (d, <sup>3</sup>*J* = 7.8 Hz, 1 H, 5-H), 7.74 (s, 1 H, 4-H), 11.81 (bs, 1 H, NH).

**<sup>13</sup>C-NMR** (125.8 MHz, CDCl<sub>3</sub>):  $\delta$  [ppm] = 54.3 (d, CHNH<sub>2</sub>), 55.4 (q, OCH<sub>3</sub>), 114.0 (d, C-3'), 115.4 (d, C-8), 120.1 (s, C-4a), 122.7 (d, C-6), 128.1 (d, C-5), 128.6 (d, C-2'), 130.1 (d, C-7), 134.9 (s, C-1'), 136.3 (d, C-4), 137.4 (s, C-8a), 158.9 (s, C-4'), 163.0 (s, C-2).

*Due to signal overlap and broadening C-3 cannot be assigned.*

**HRMS** (ESI): C<sub>17</sub>H<sub>14</sub>NO<sub>2</sub> [(M-NH<sub>2</sub>)<sup>+</sup>]: calcd.: 264.1019; found: 264.1022

C<sub>17</sub>H<sub>17</sub>N<sub>2</sub>O<sub>2</sub> [(M+H)<sup>+</sup>]: calcd.: 281.1285; found: 281.1287.

## 2. NMR spectra of new compounds

$^1\text{H}$  NMR (300 K,  $\text{CDCl}_3$ )

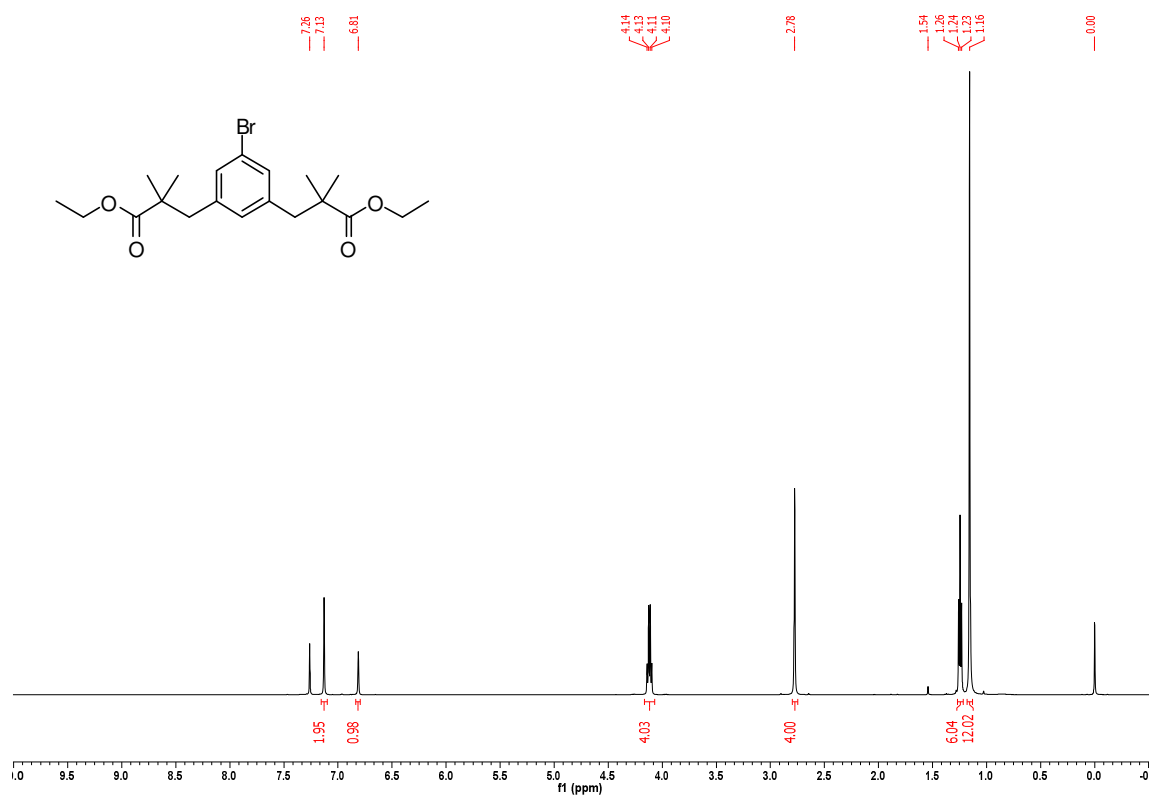

$^{13}\text{C}$  NMR (300 K,  $\text{CDCl}_3$ )

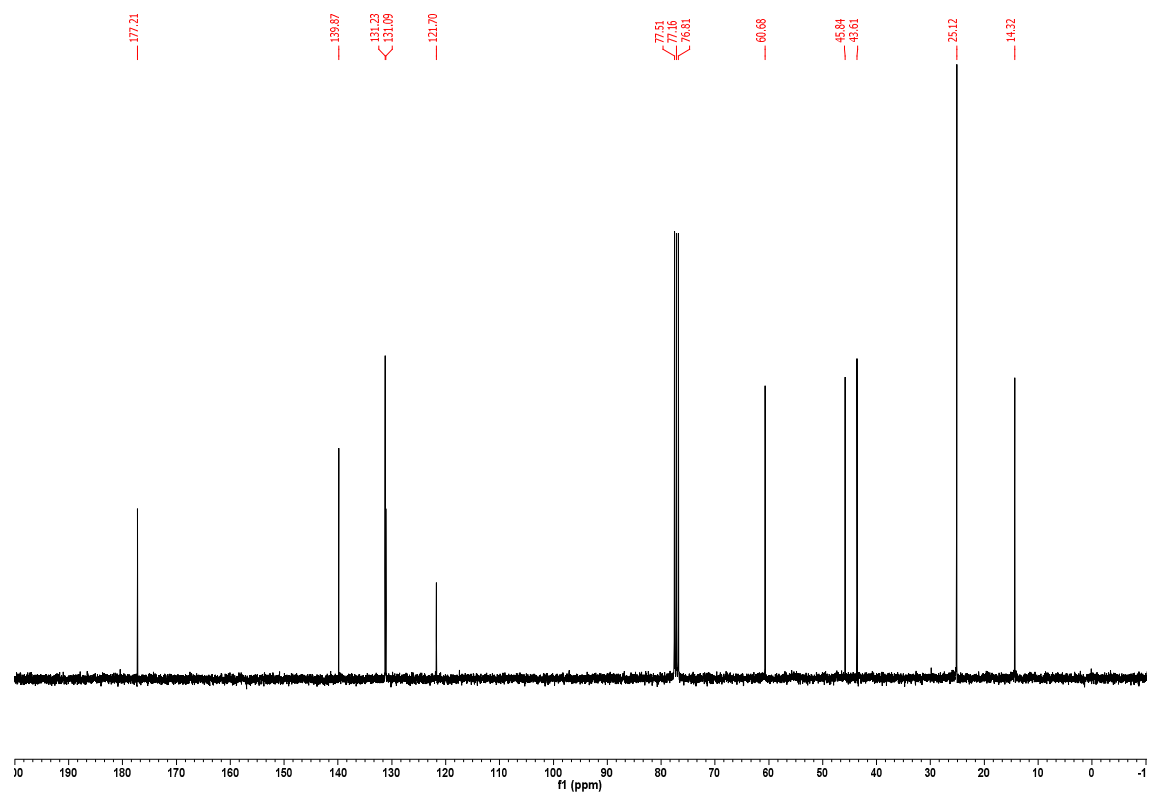







<sup>1</sup>H NMR (300 K, DMSO-d<sub>6</sub>)

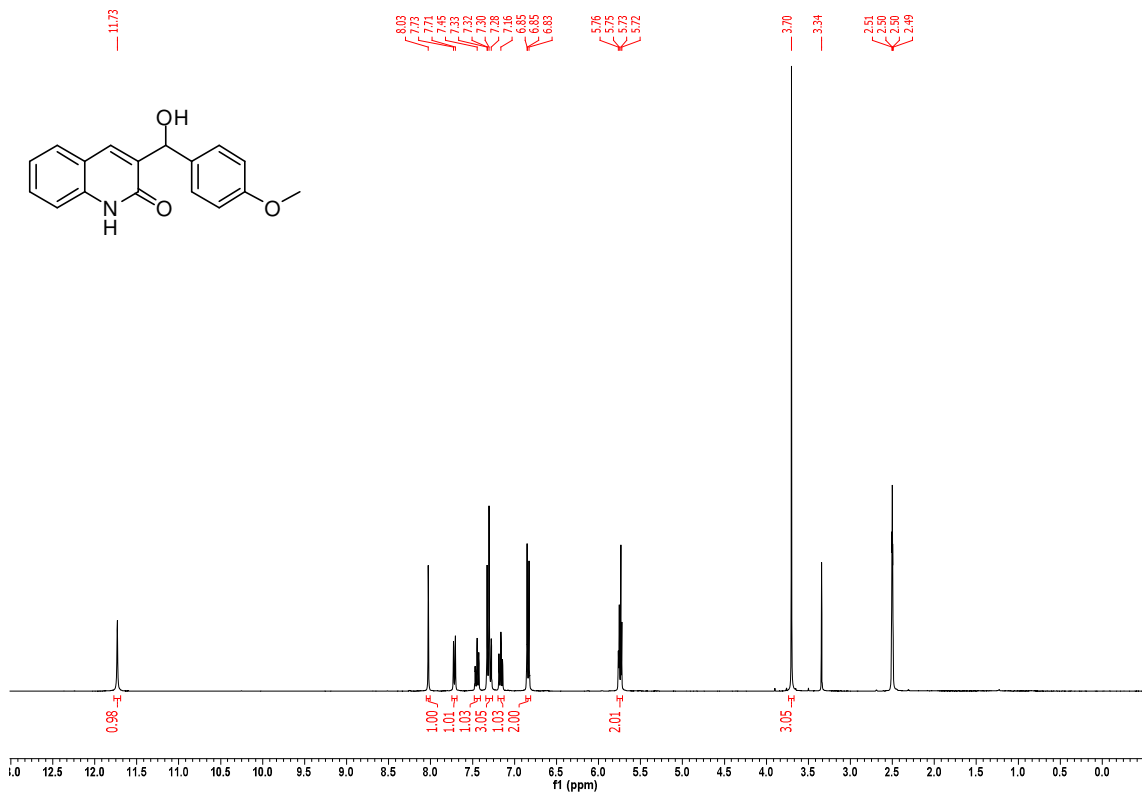

<sup>13</sup>C NMR (300 K, DMSO-d<sub>6</sub>)

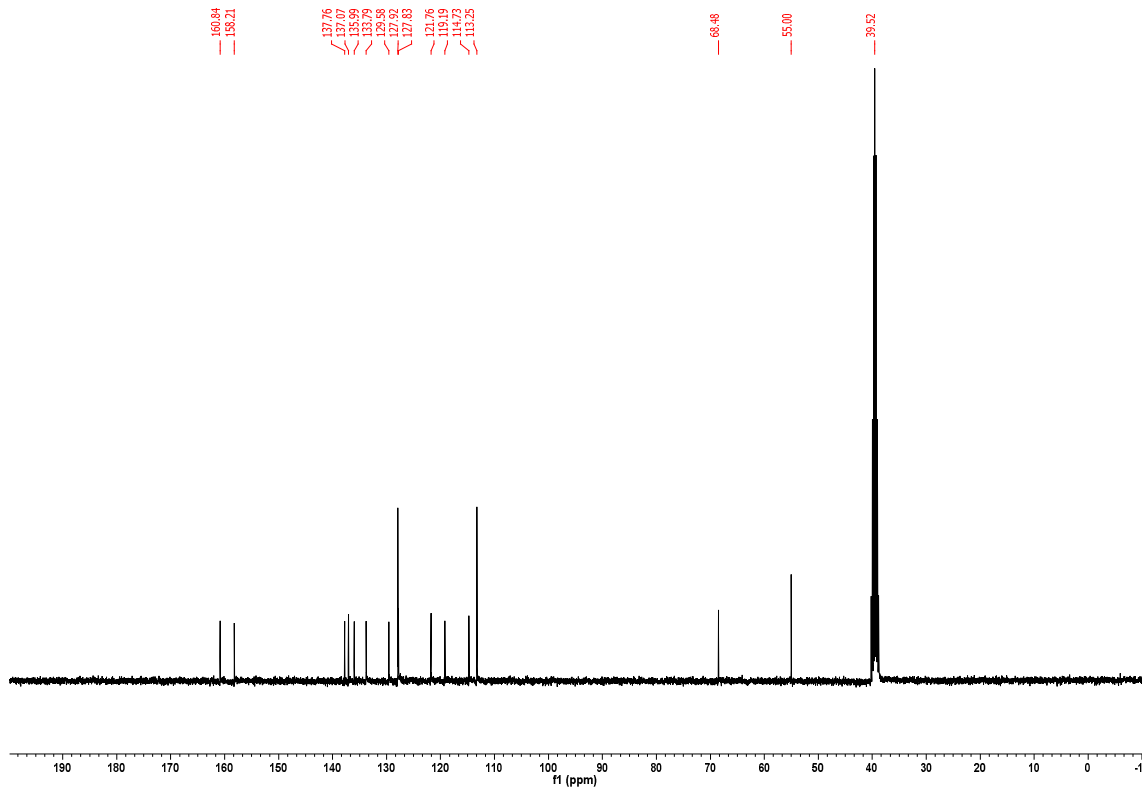

<sup>1</sup>H NMR (300 K, CDCl<sub>3</sub>)

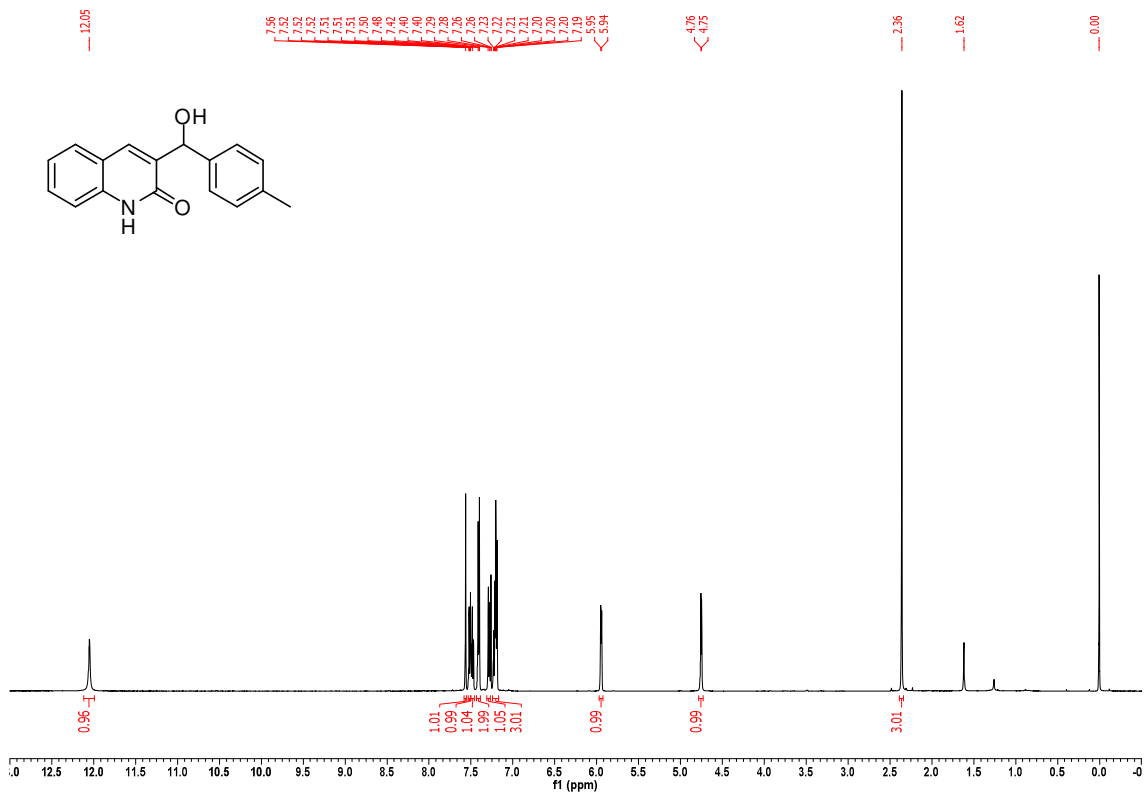

<sup>13</sup>C NMR (300 K, CDCl<sub>3</sub>)

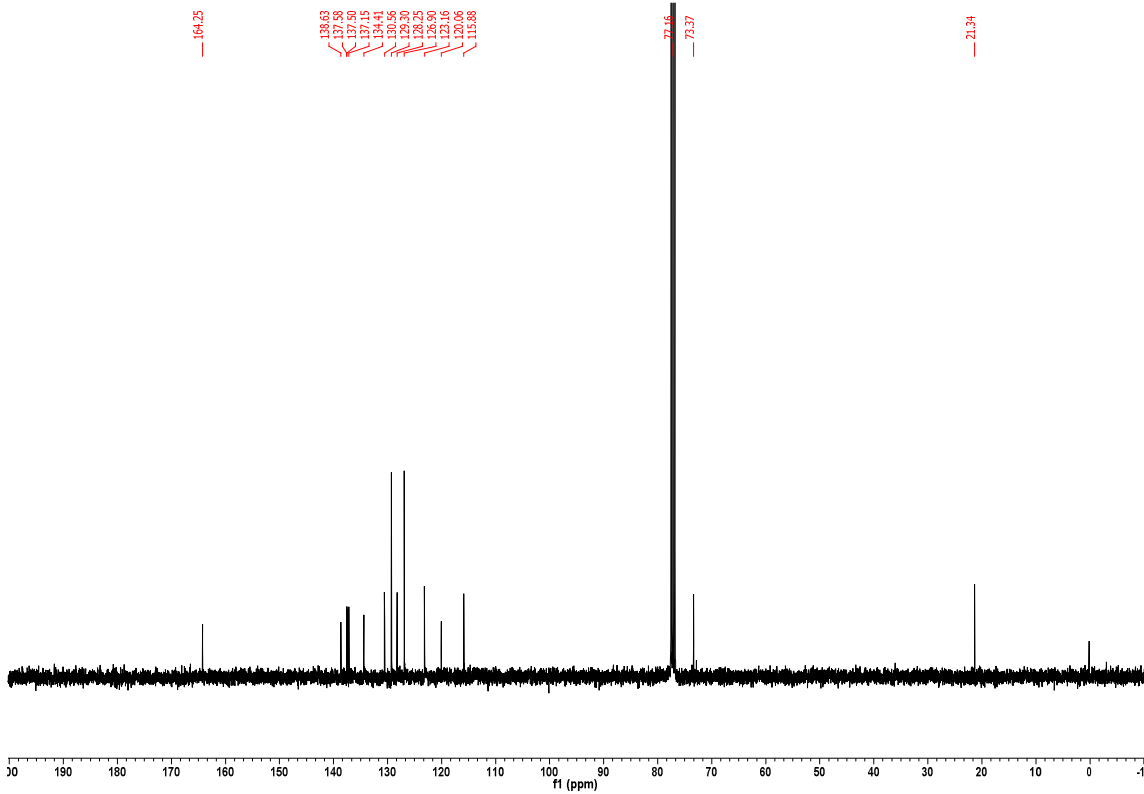

$^1\text{H}$  NMR (300 K,  $\text{CDCl}_3$ )

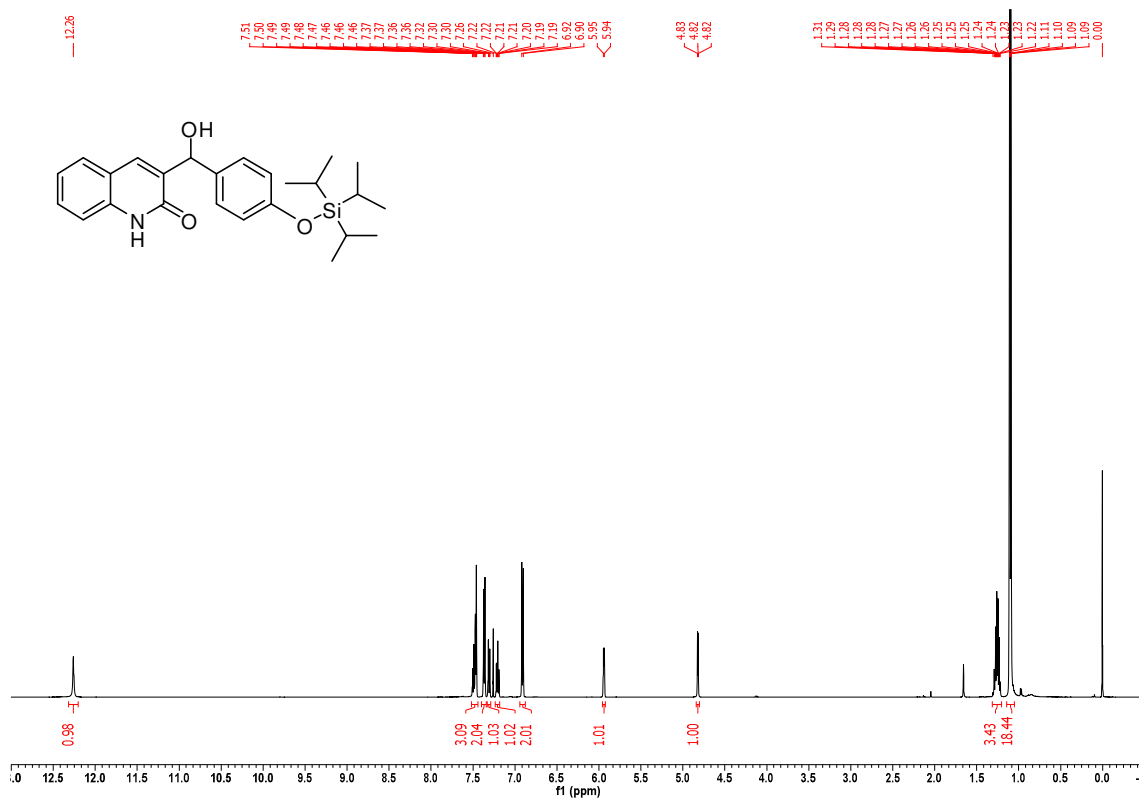

$^{13}\text{C}$  NMR (300 K,  $\text{CDCl}_3$ )

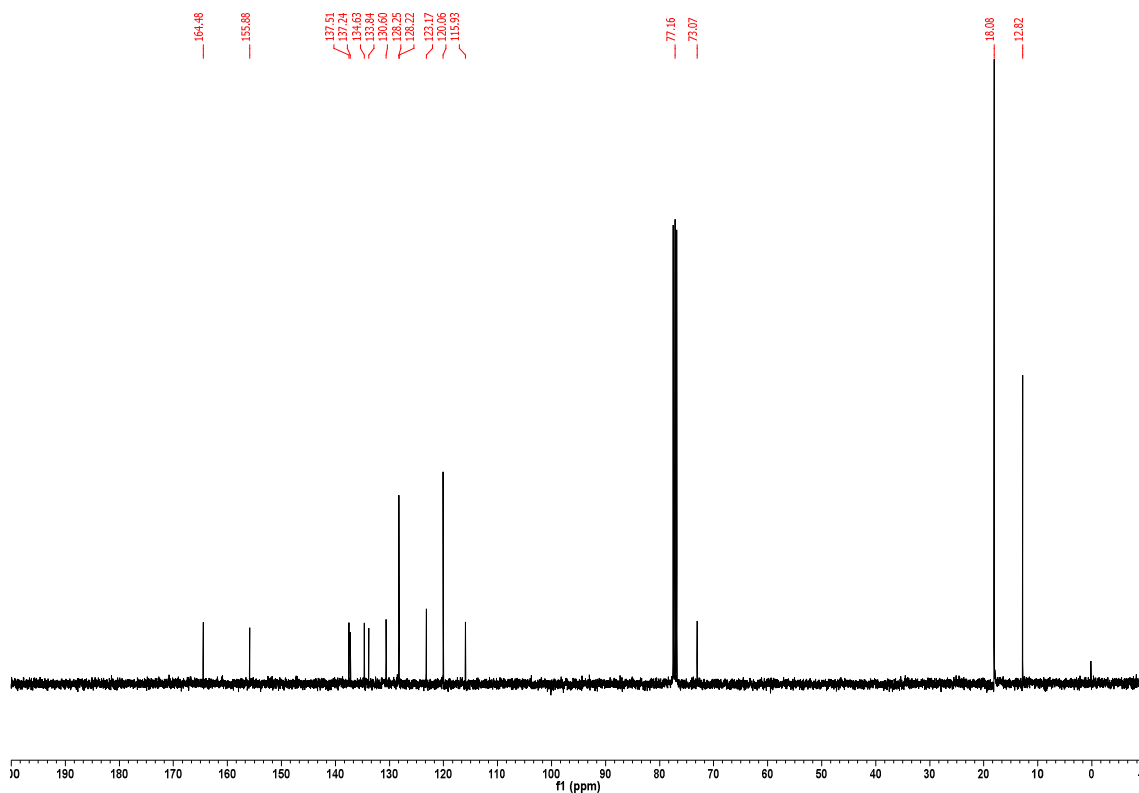

<sup>1</sup>H NMR (300 K, DMSO-d<sub>6</sub>)

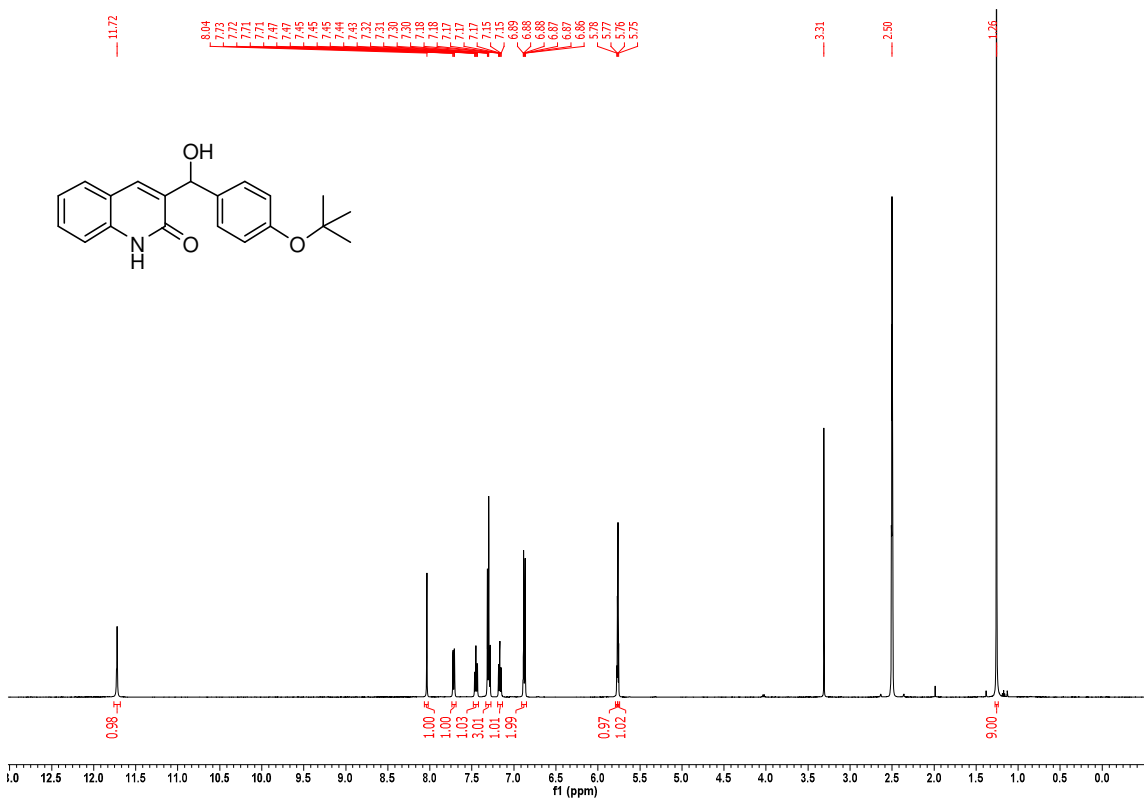

<sup>13</sup>C NMR (300 K, DMSO-d<sub>6</sub>)

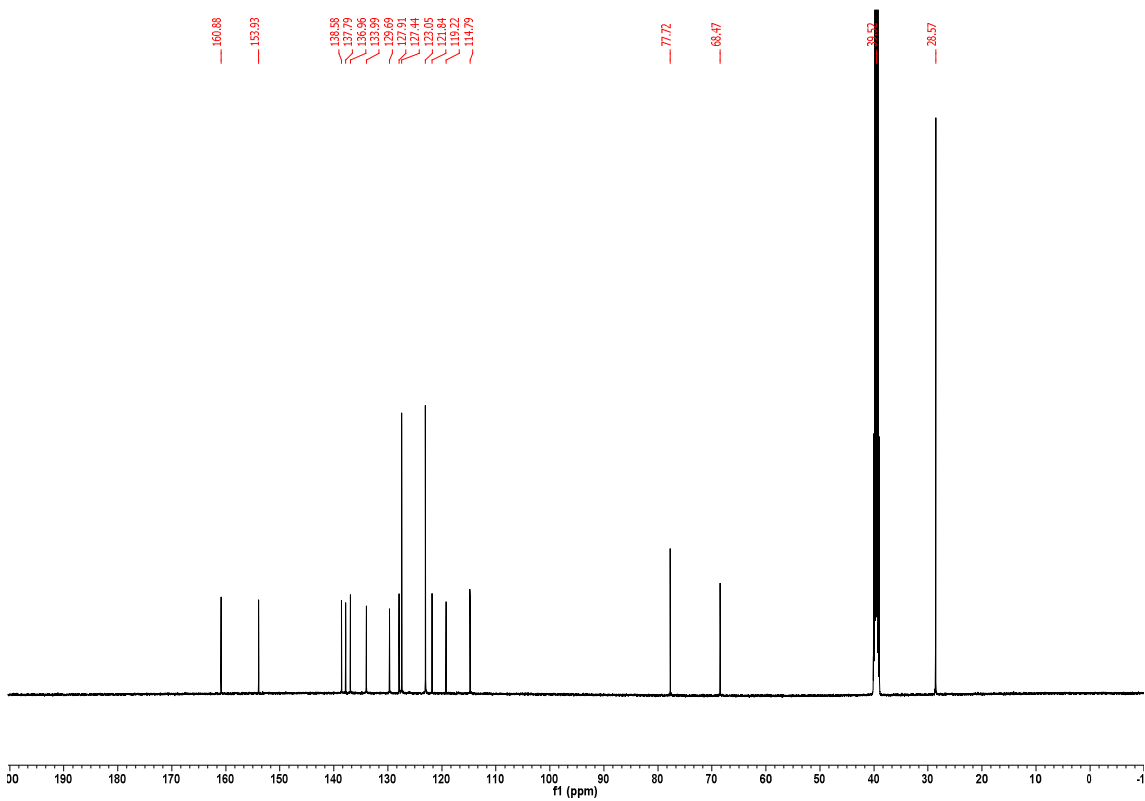

<sup>1</sup>H NMR (300 K, DMSO-d<sub>6</sub>)

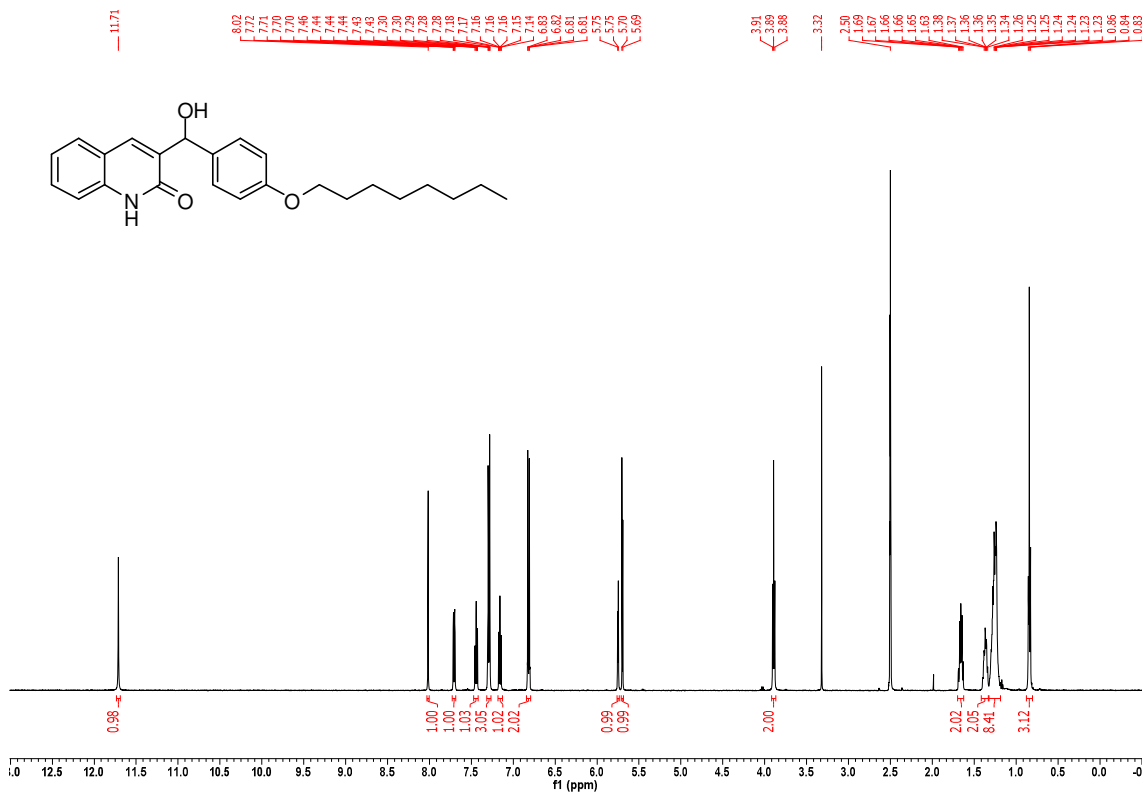

<sup>1</sup>H NMR (300 K, DMSO-d<sub>6</sub>)

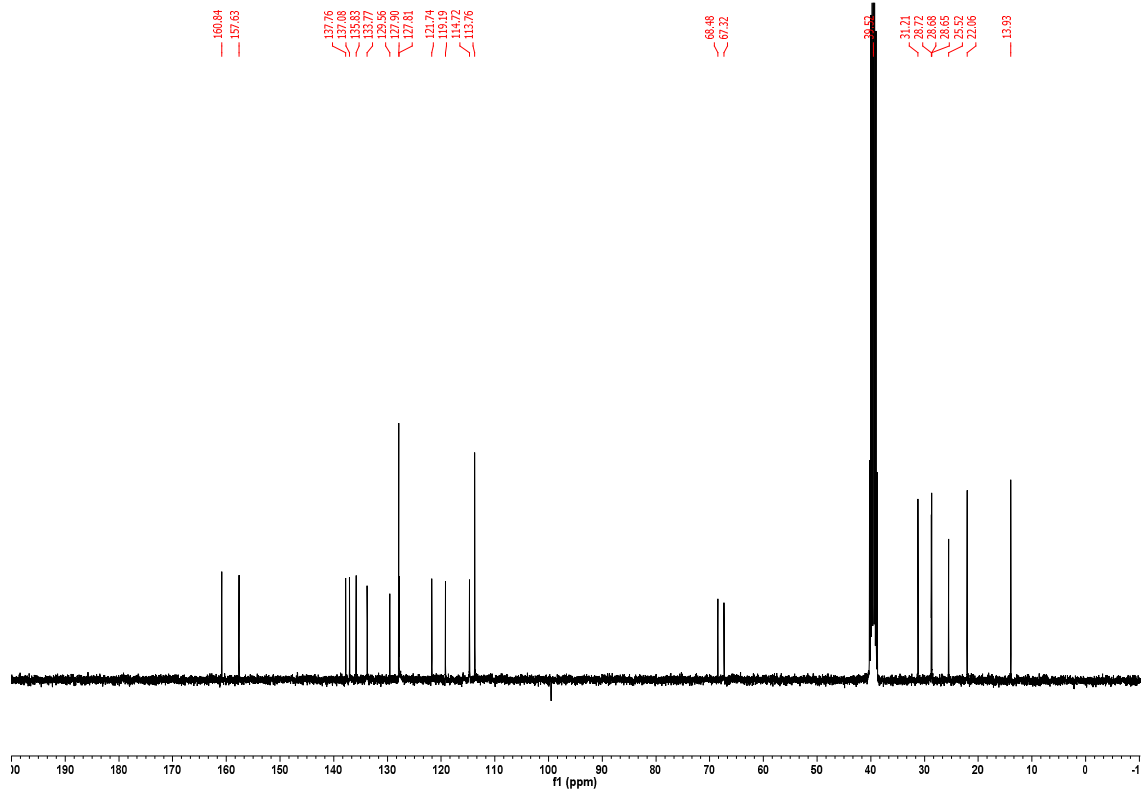

<sup>1</sup>H NMR (300 K, CDCl<sub>3</sub>)

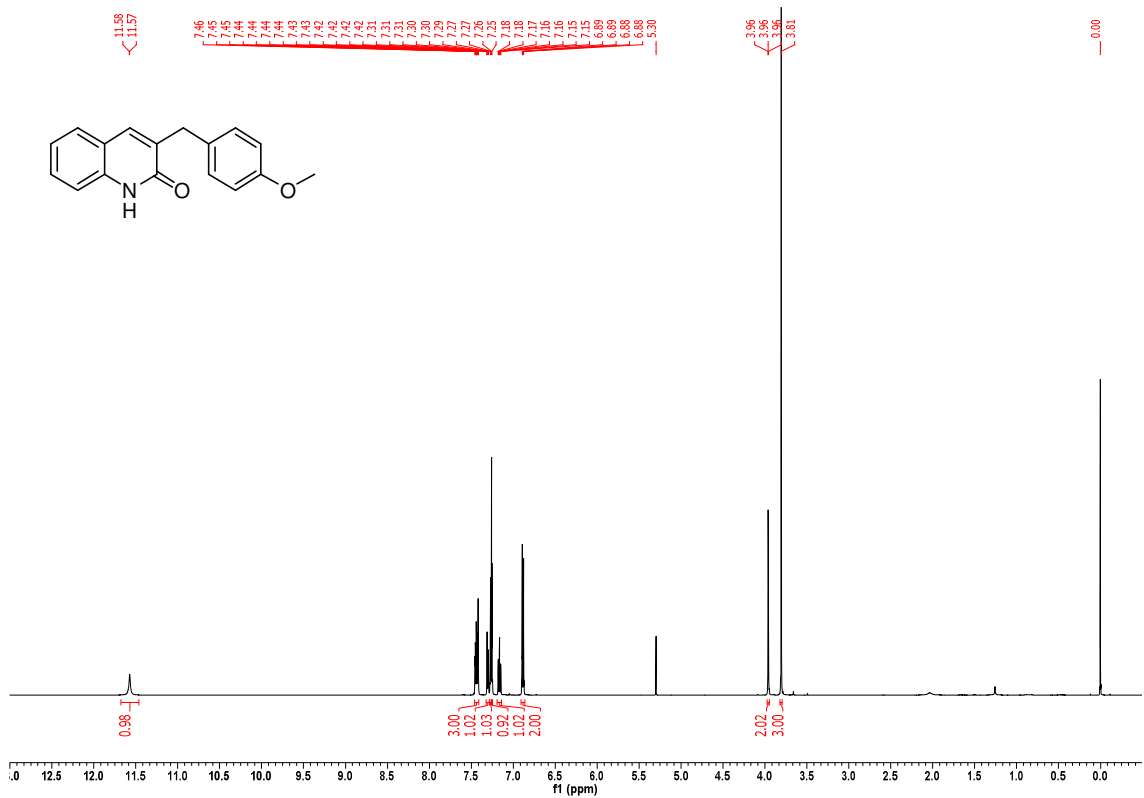

<sup>13</sup>C NMR (300 K, CDCl<sub>3</sub>)

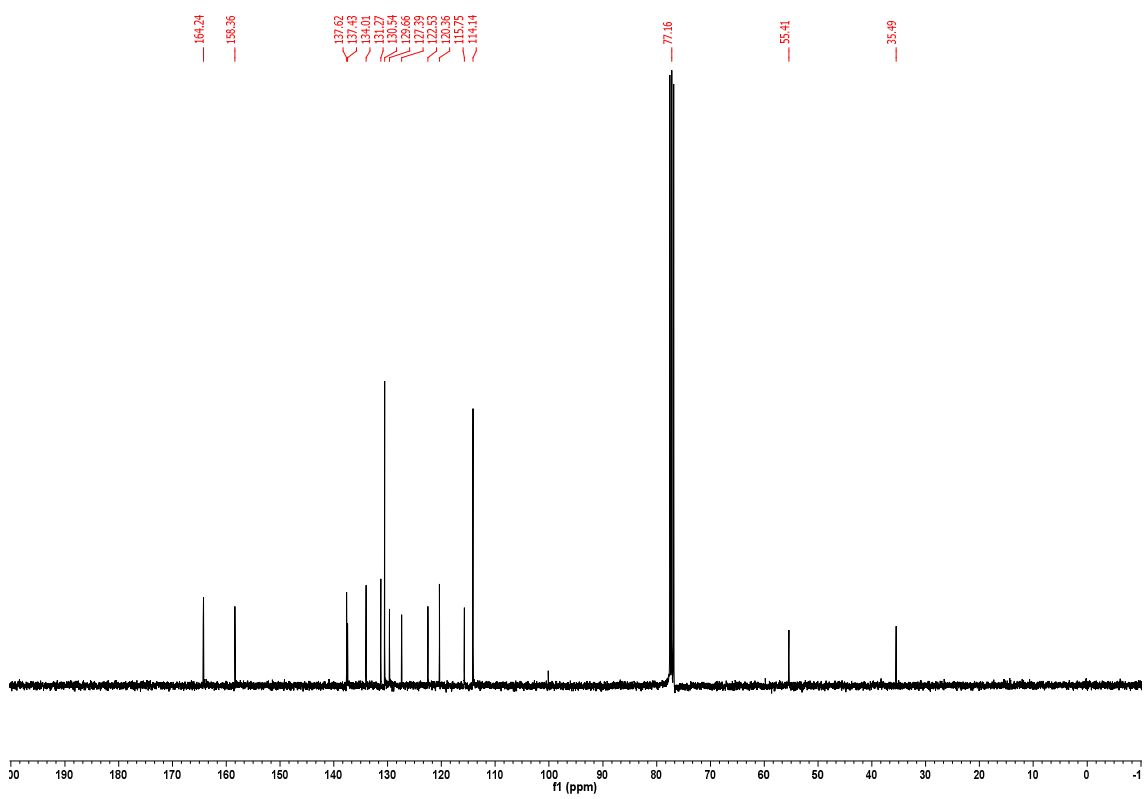

$^1\text{H}$  NMR (300 K,  $\text{CDCl}_3$ )

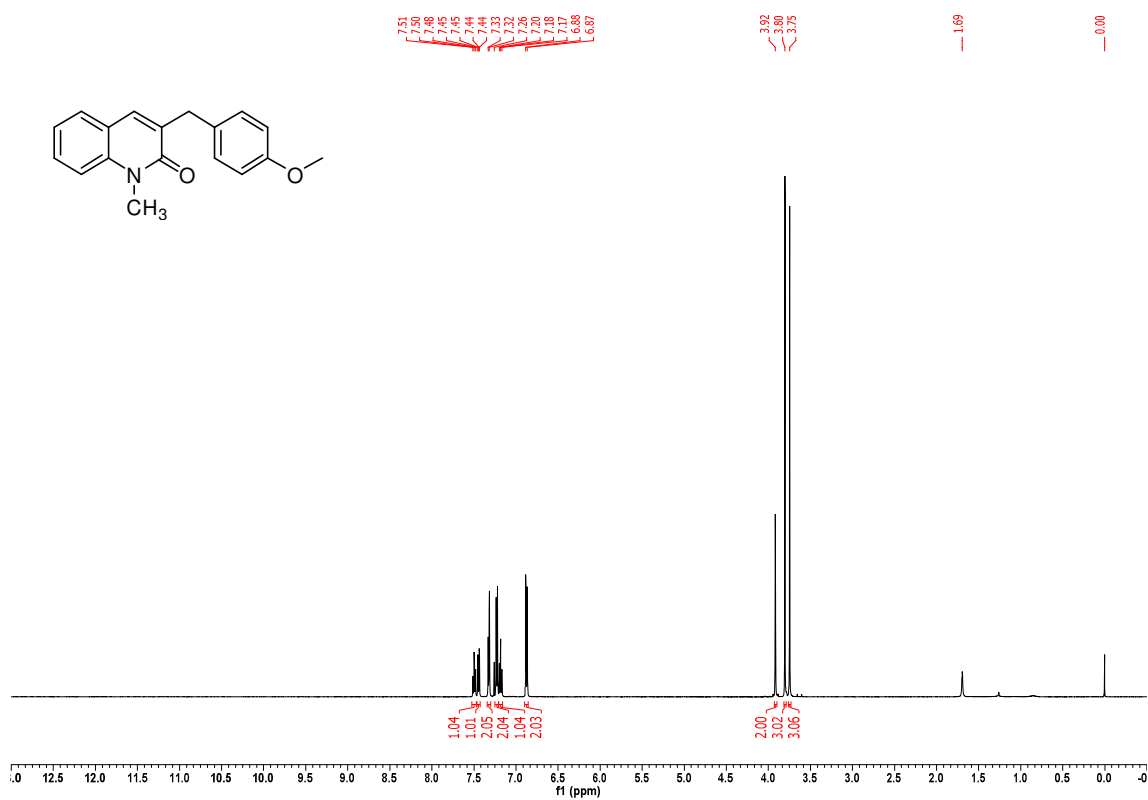

$^{13}\text{C}$  NMR (300 K,  $\text{CDCl}_3$ )

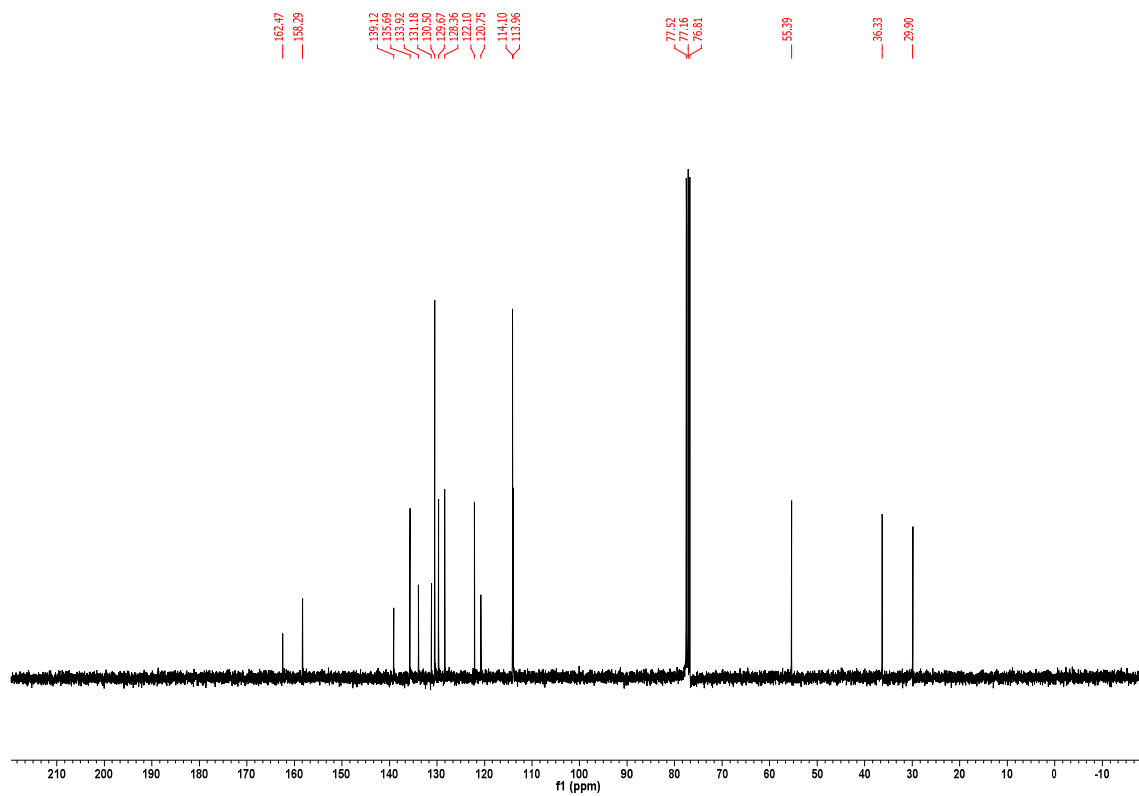





$^1\text{H}$  NMR (300 K,  $\text{CDCl}_3$ )

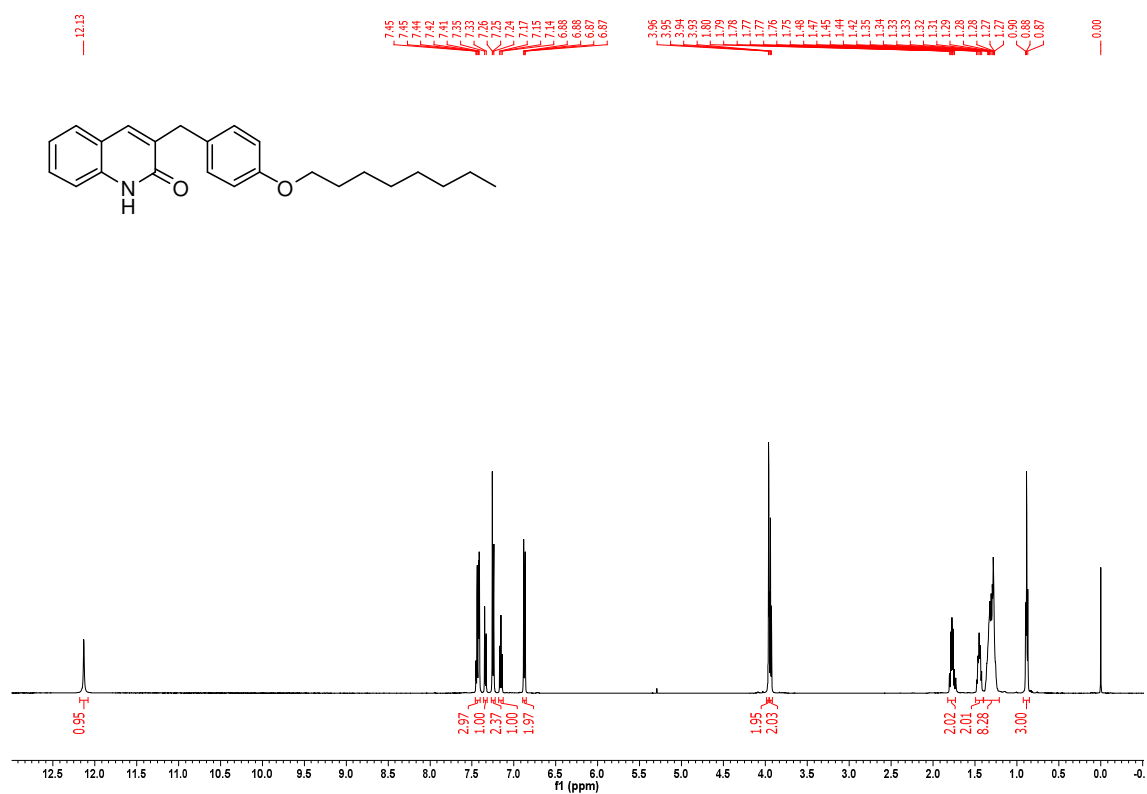

$^{13}\text{C}$  NMR (300 K,  $\text{CDCl}_3$ )

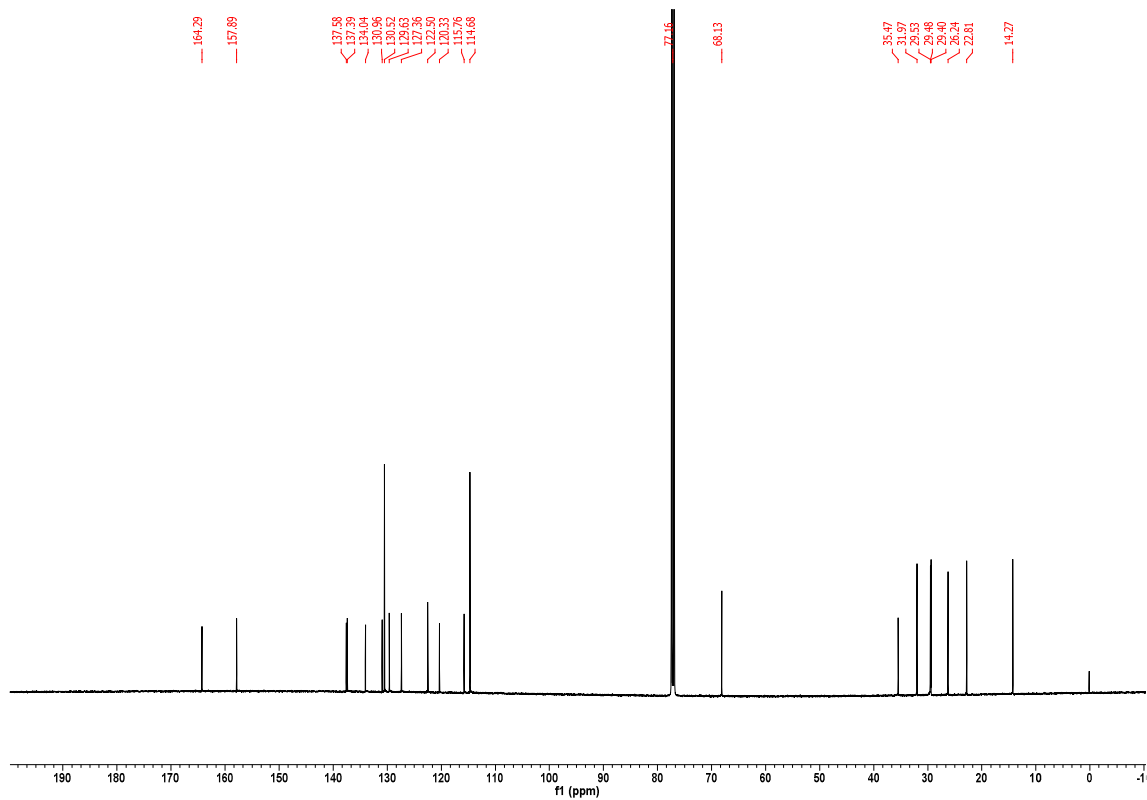

<sup>1</sup>H NMR (300 K, CDCl<sub>3</sub>)

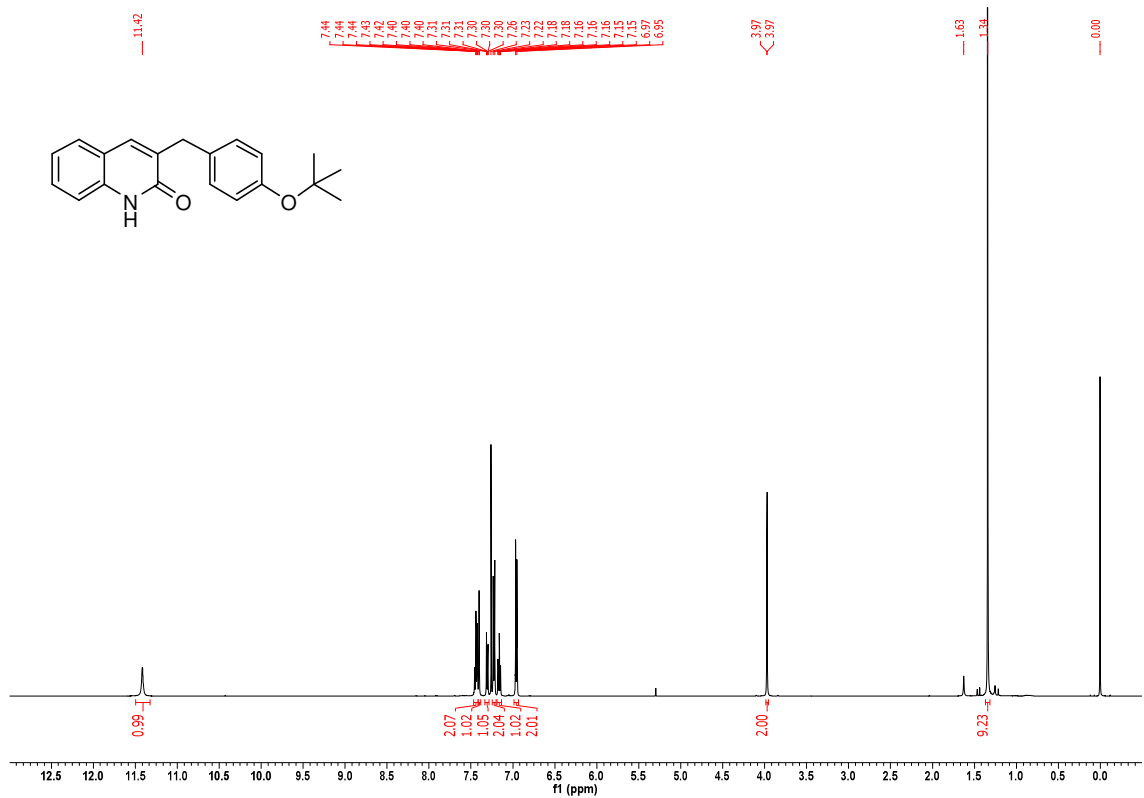

<sup>13</sup>C NMR (300 K, CDCl<sub>3</sub>)

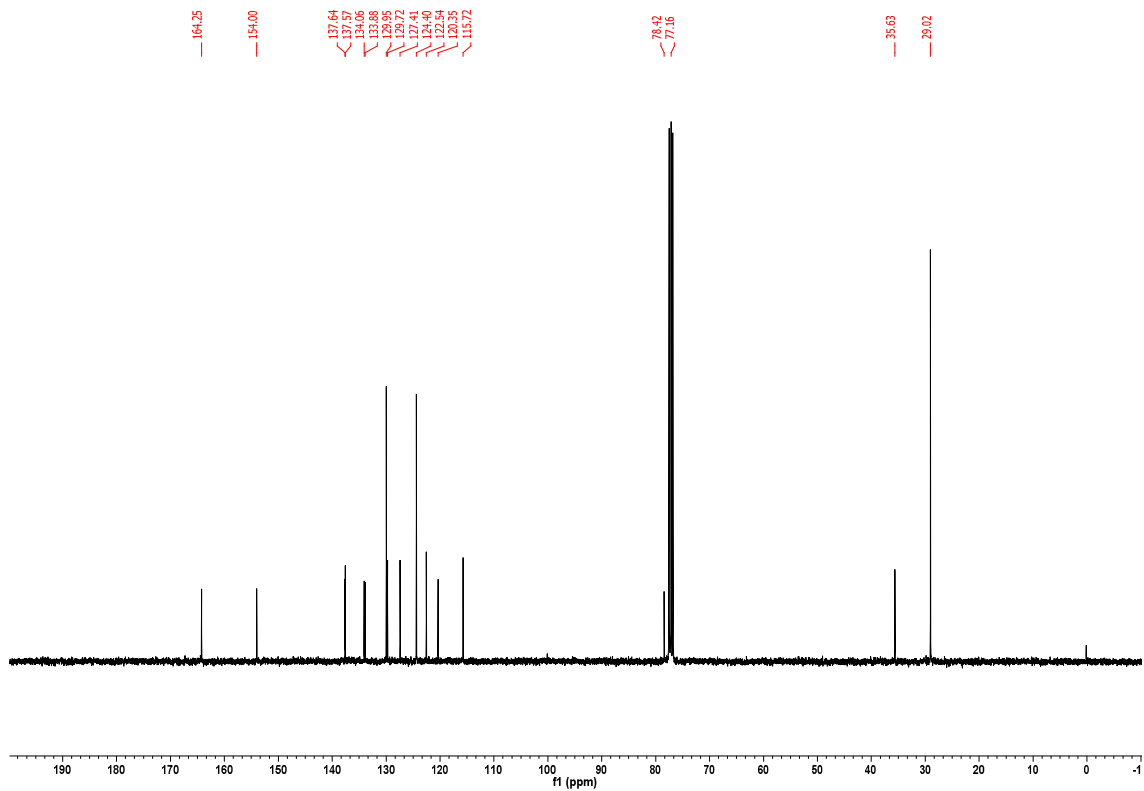

$^1\text{H}$  NMR (300 K,  $\text{CDCl}_3$ )

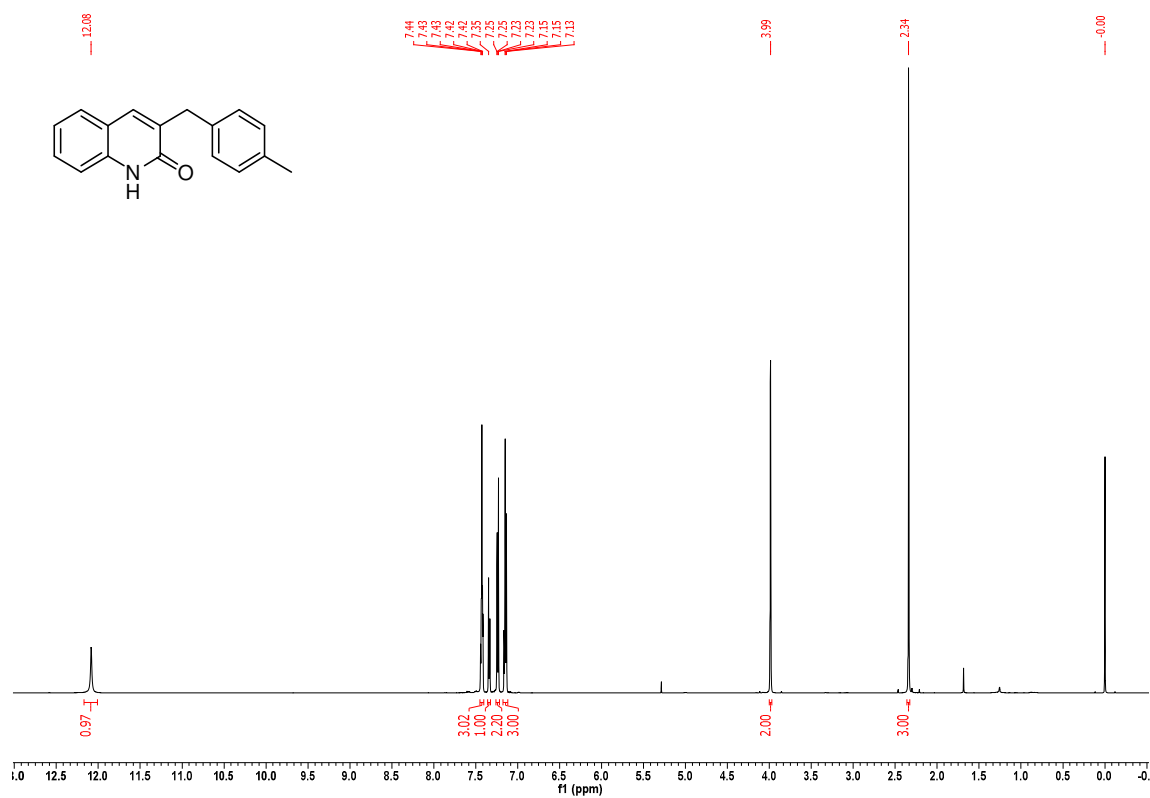

$^{13}\text{C}$  NMR (300 K,  $\text{CDCl}_3$ )

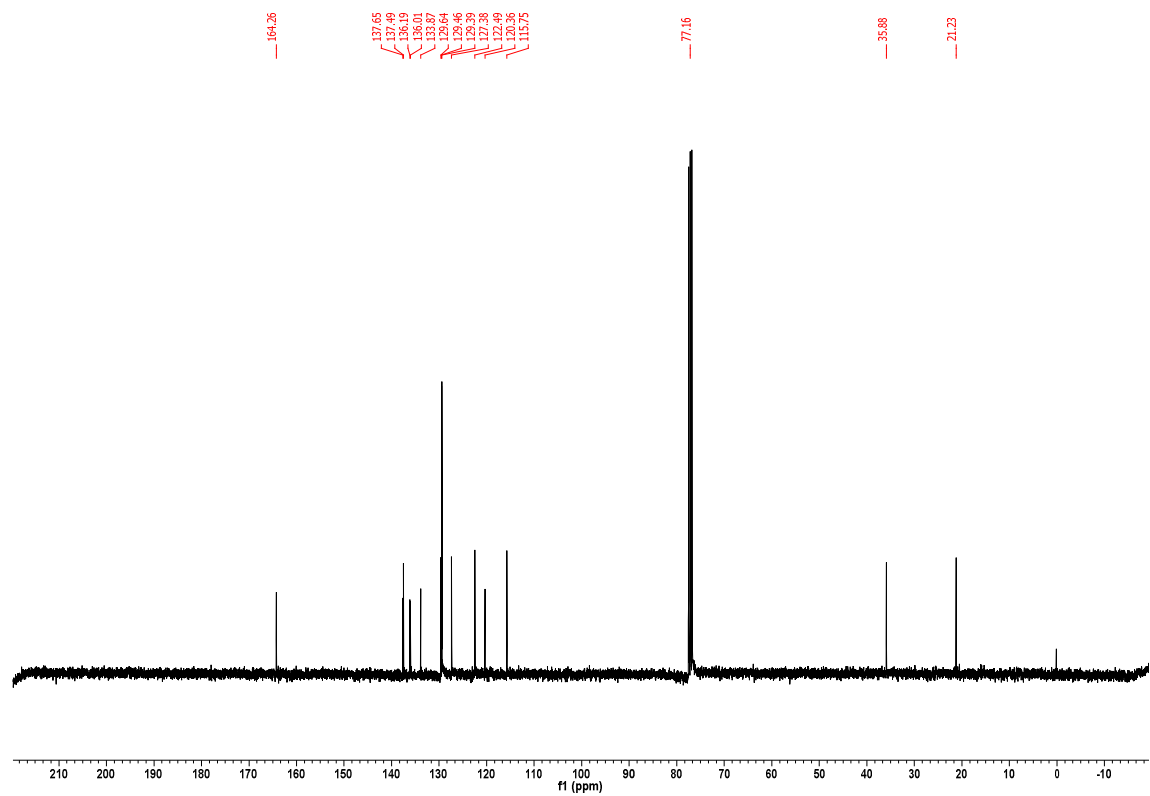

$^1\text{H}$  NMR (300 K,  $\text{CDCl}_3$ )

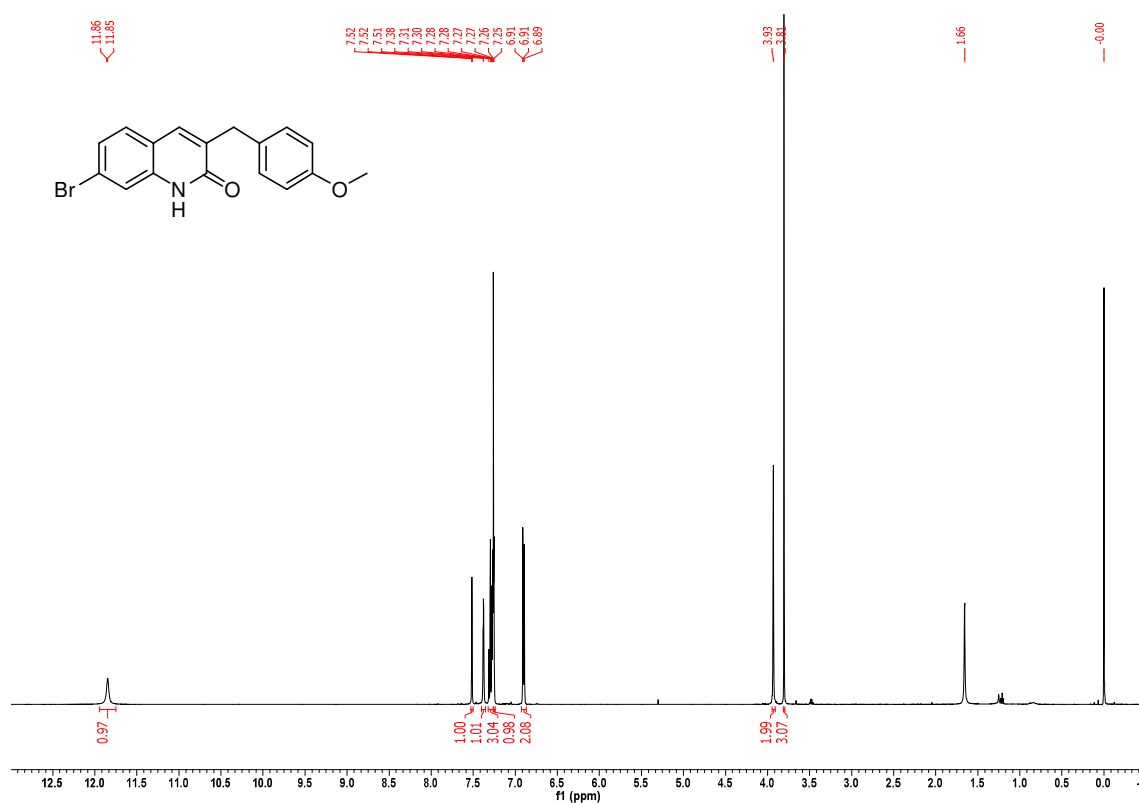

$^{13}\text{C}$  NMR (300 K,  $\text{CDCl}_3$ )

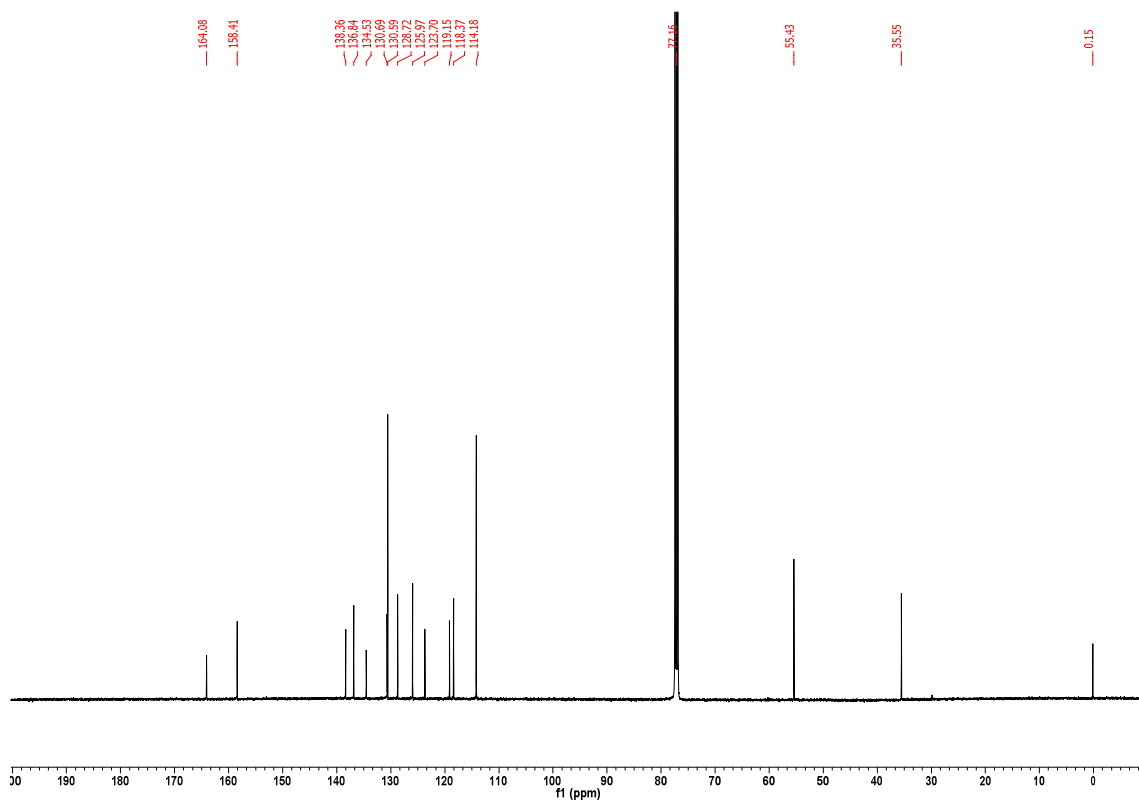

<sup>1</sup>H NMR (300 K, CDCl<sub>3</sub>)

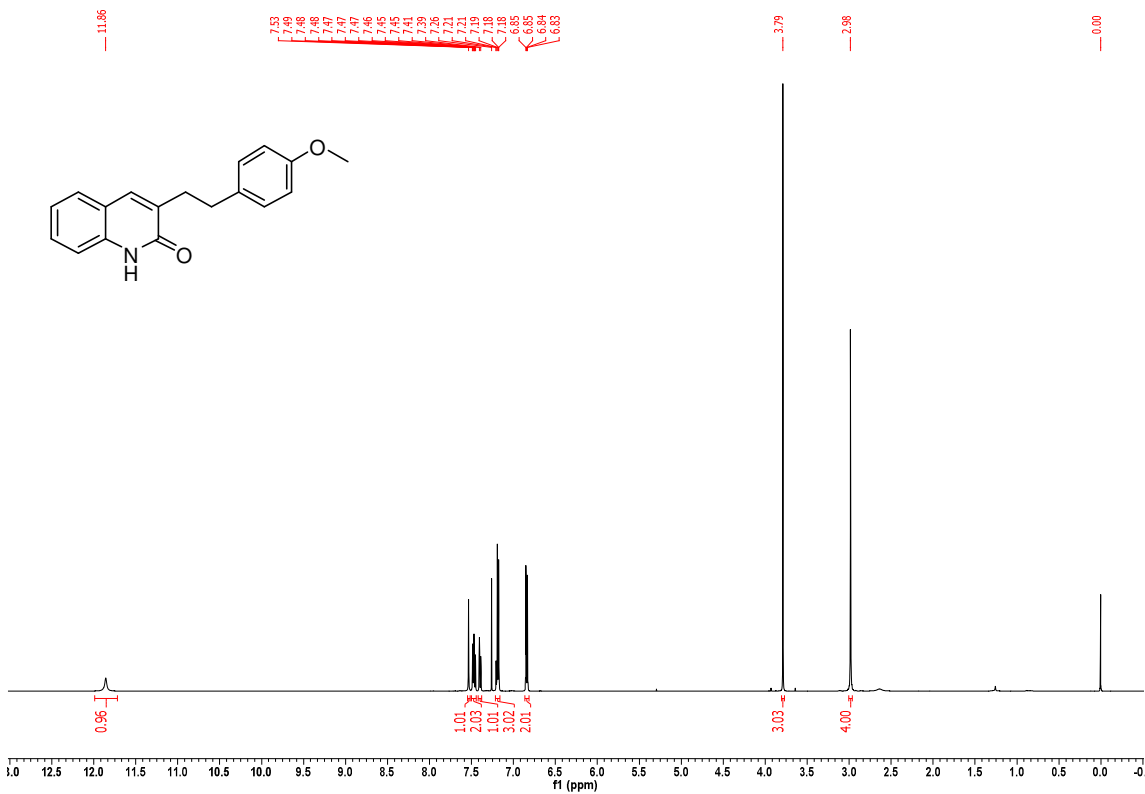

<sup>13</sup>C NMR (300 K, CDCl<sub>3</sub>)

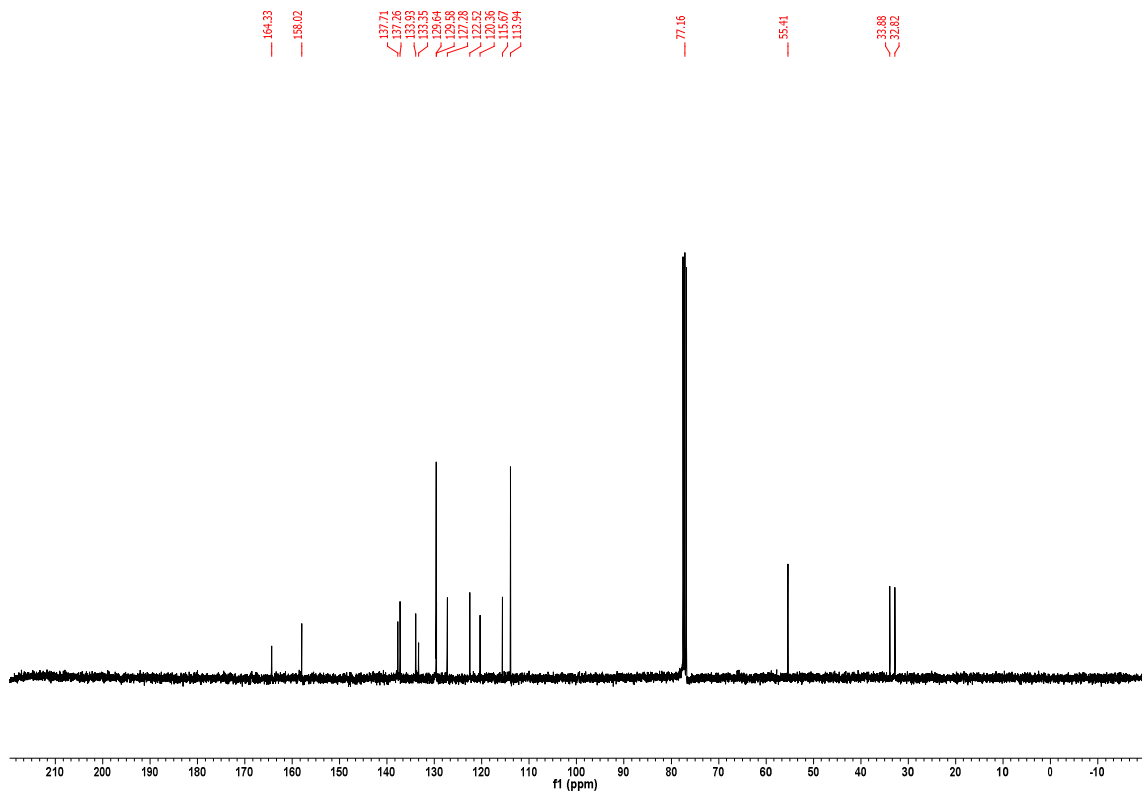

<sup>1</sup>H NMR (300 K, CDCl<sub>3</sub>)

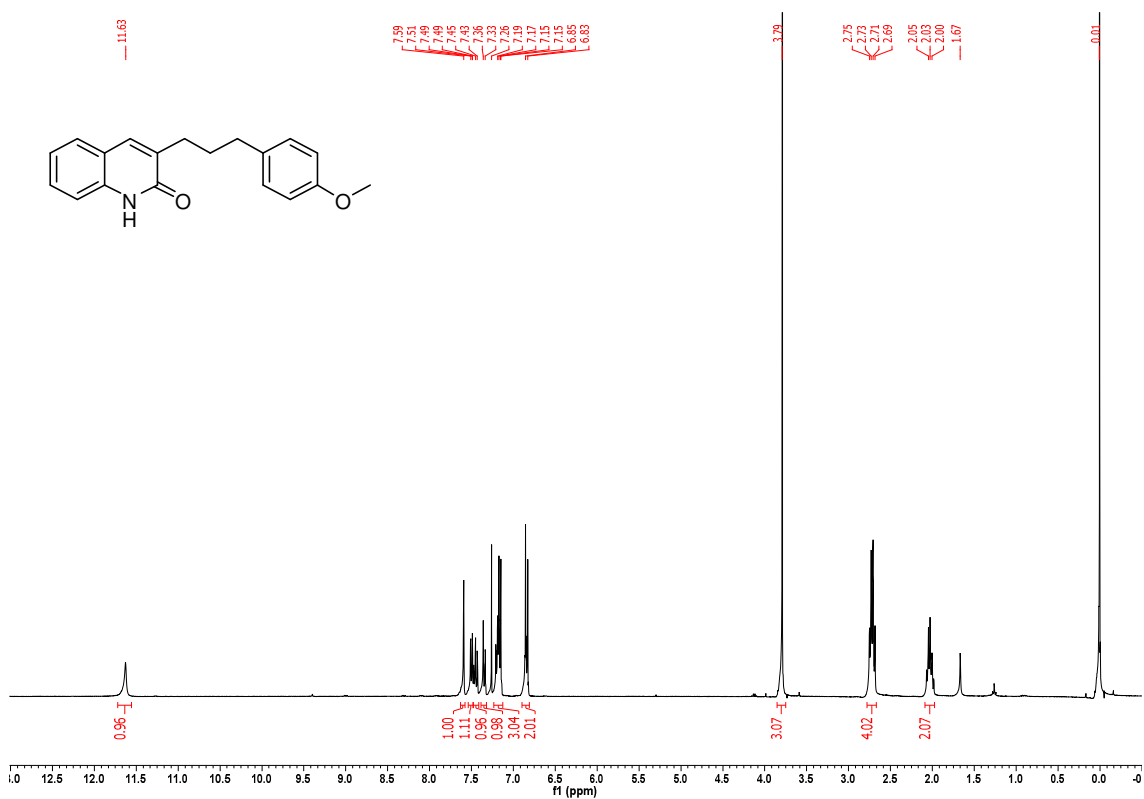

<sup>13</sup>C NMR (300 K, CDCl<sub>3</sub>)

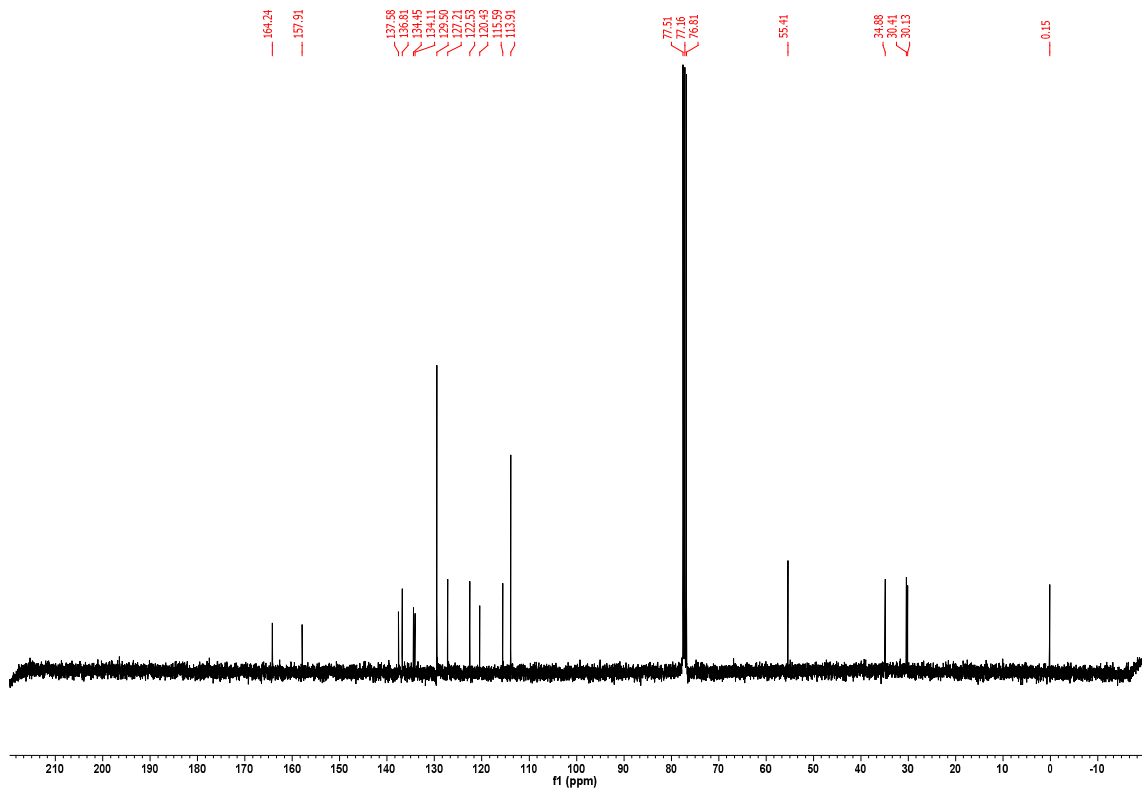

<sup>1</sup>H NMR (300 K, DMSO-d<sub>6</sub>)

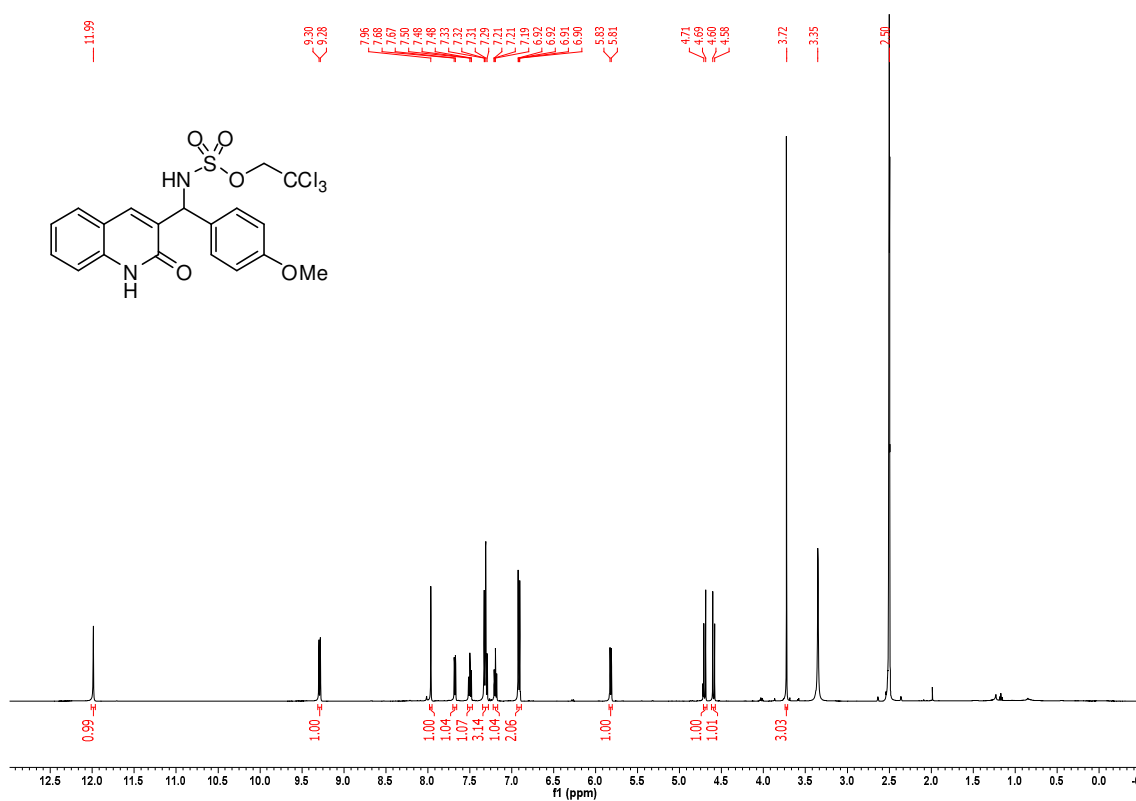

<sup>13</sup>C NMR (300 K, DMSO-d<sub>6</sub>)

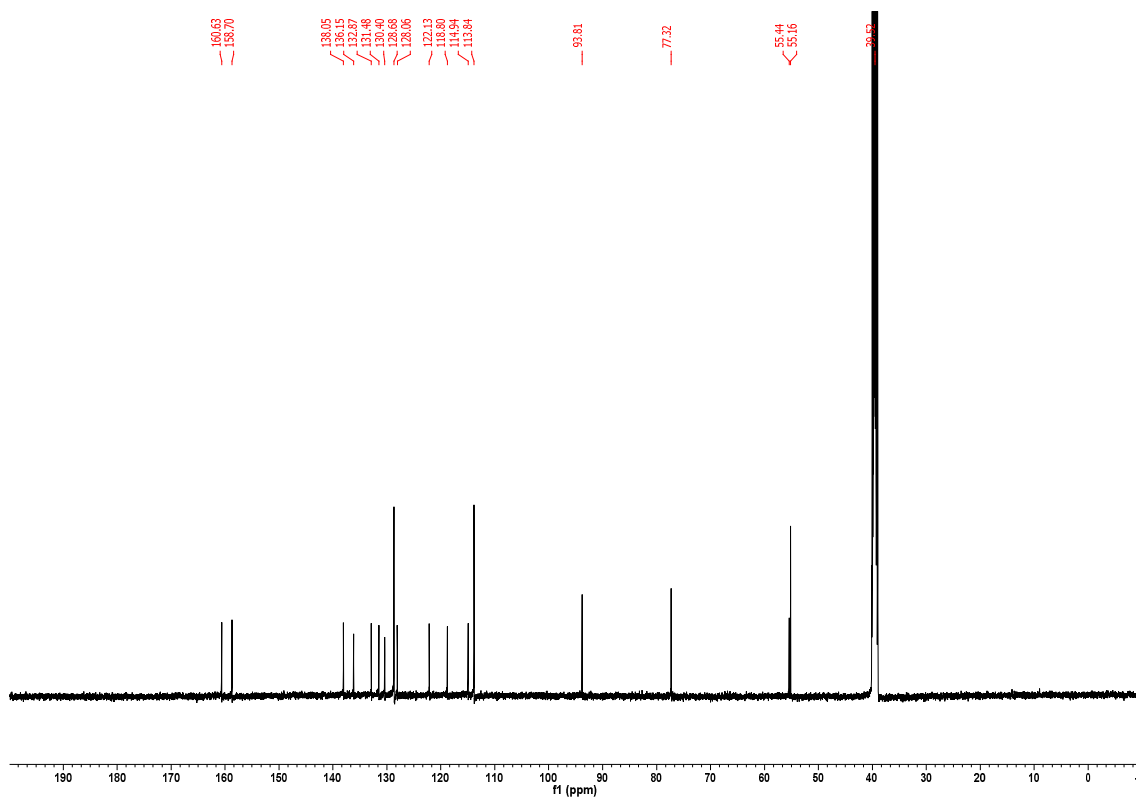





<sup>1</sup>H NMR (300 K, CDCl<sub>3</sub>)

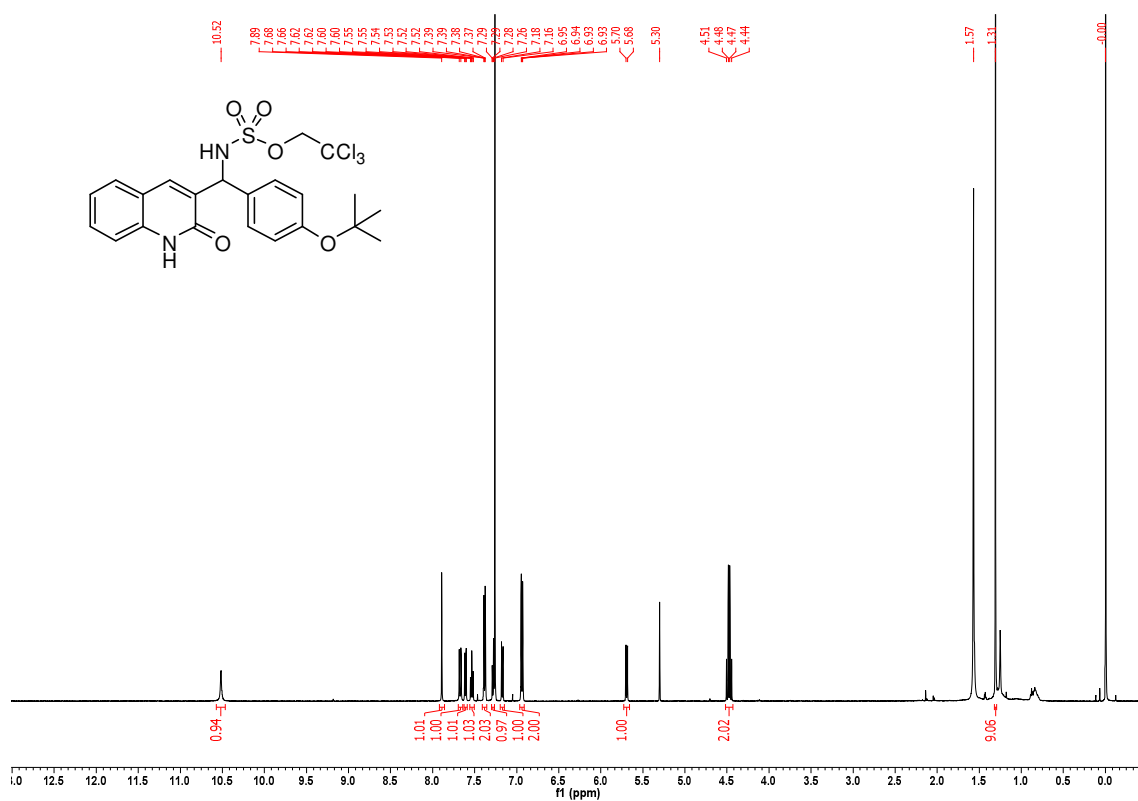

<sup>13</sup>C NMR (300 K, CDCl<sub>3</sub>)

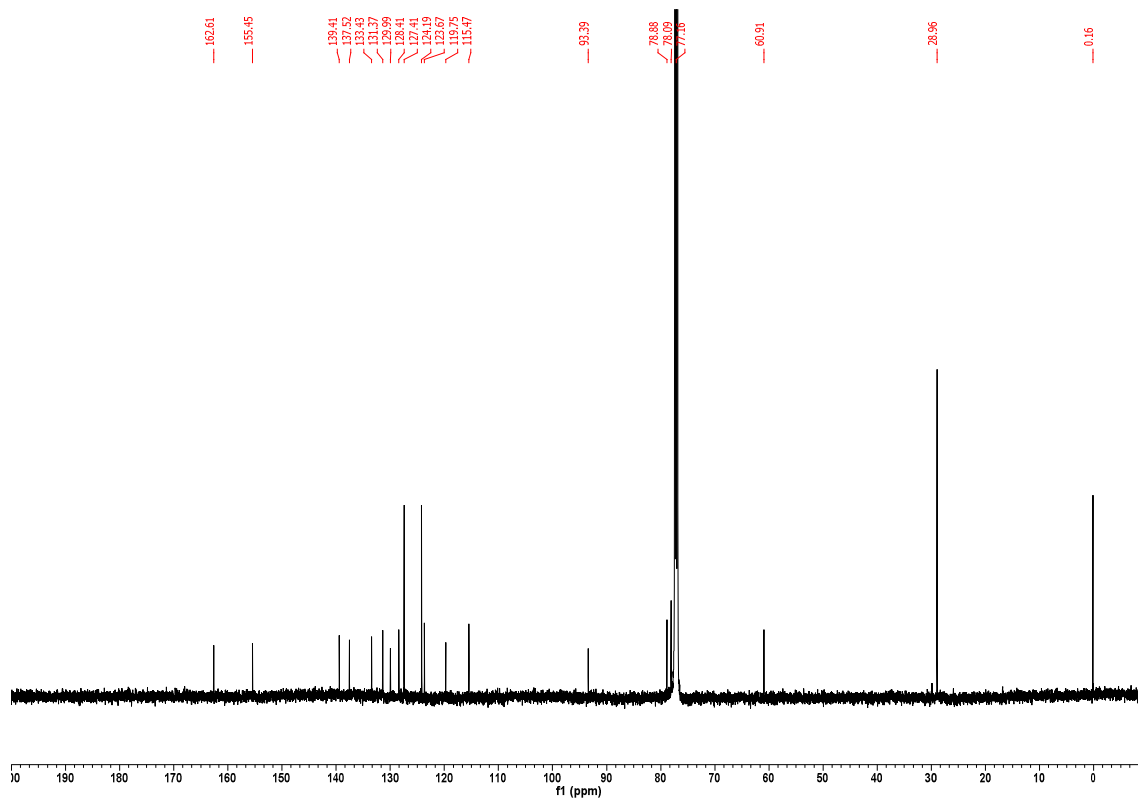

$^1\text{H}$  NMR (300 K,  $\text{CDCl}_3$ )

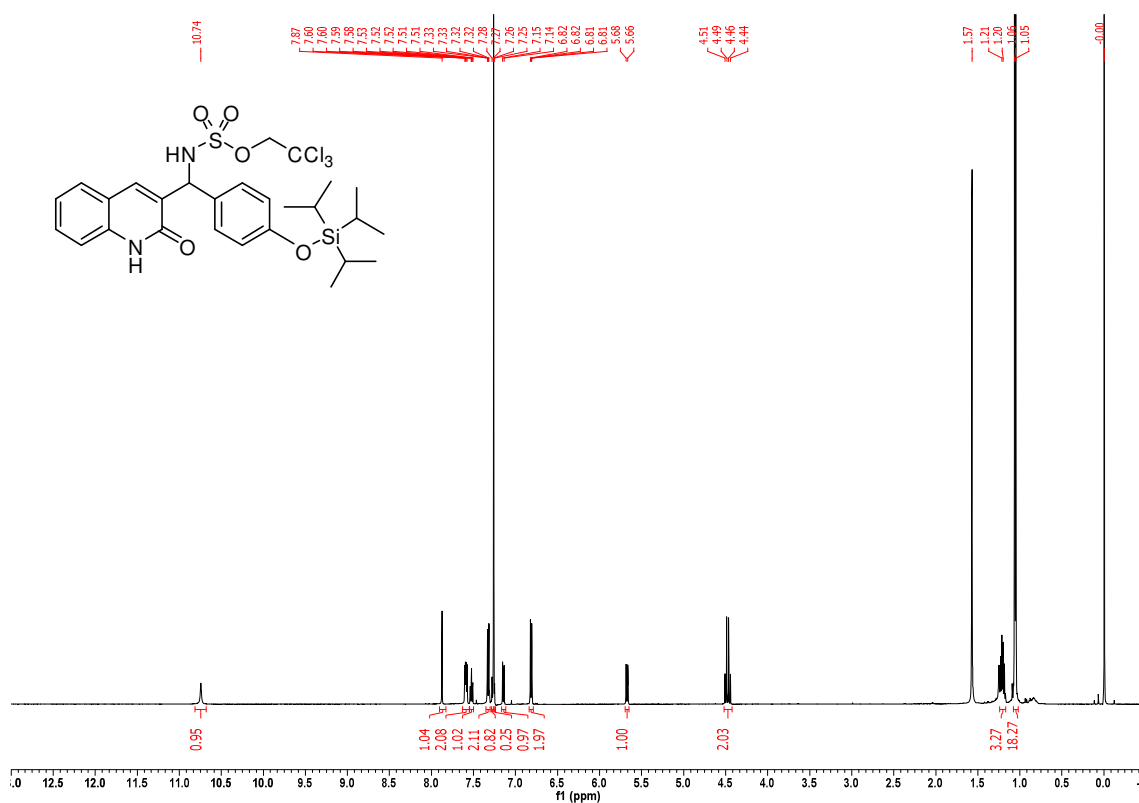

$^{13}\text{C}$  NMR (300 K,  $\text{CDCl}_3$ )

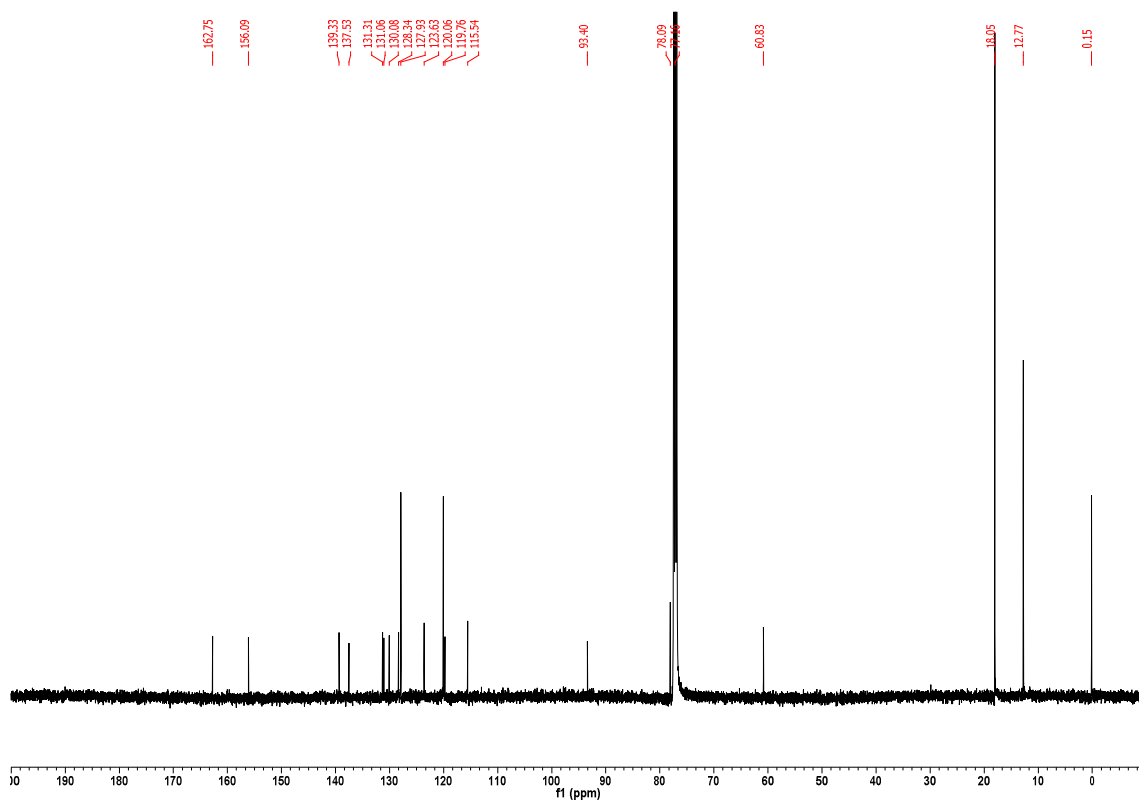



$^1\text{H}$  NMR (300 K,  $\text{CDCl}_3$ )

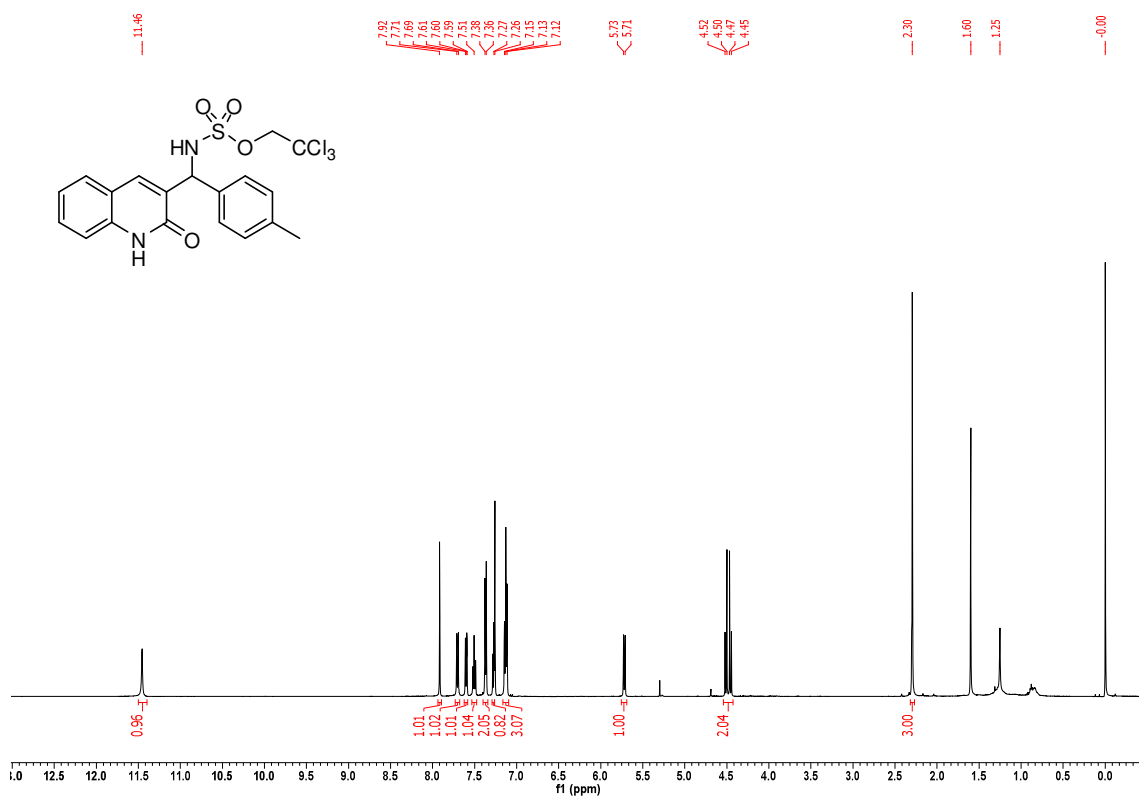

$^{13}\text{C}$  NMR (300 K,  $\text{CDCl}_3$ )

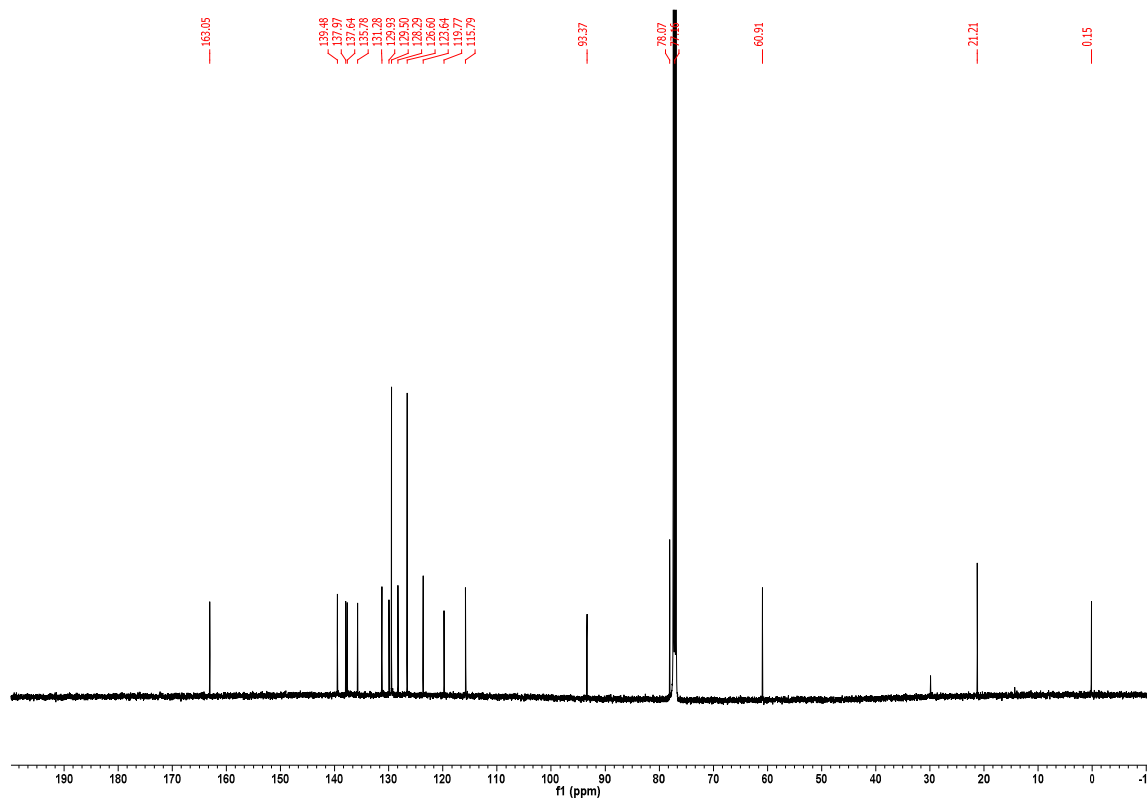

<sup>1</sup>H NMR (300 K, DMSO-d<sub>6</sub>)

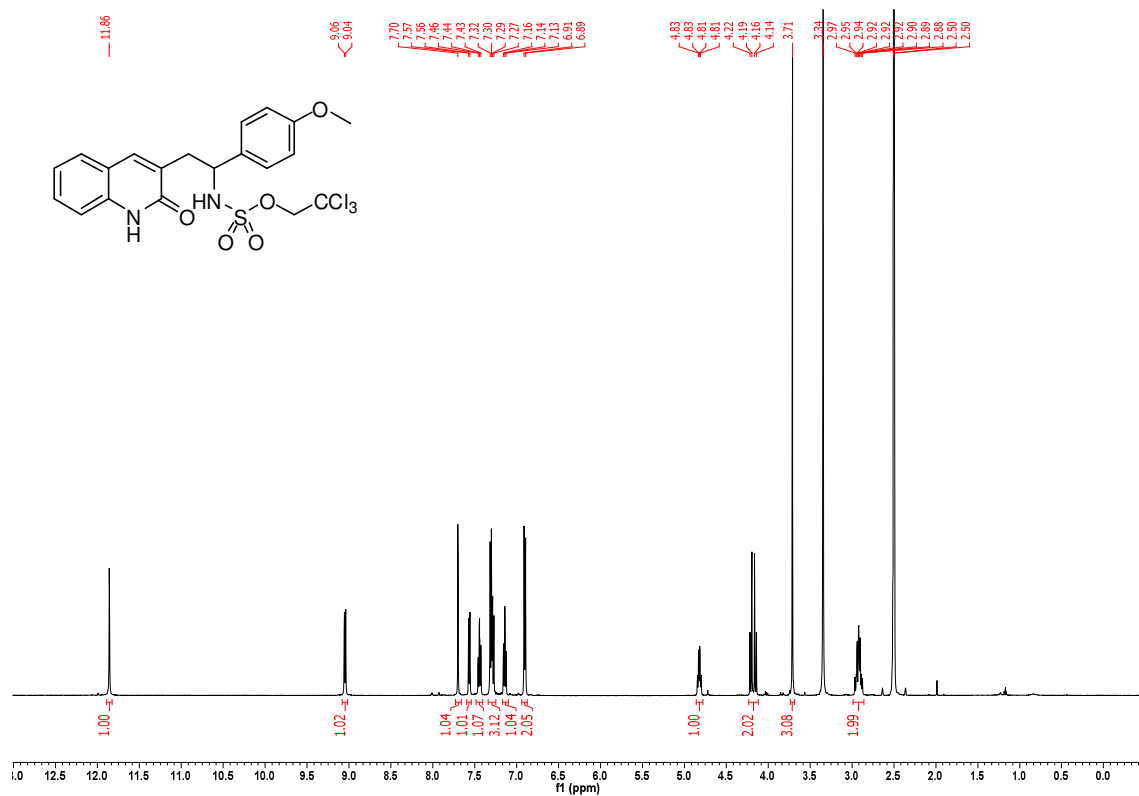

<sup>13</sup>C NMR (300 K, DMSO-d<sub>6</sub>)

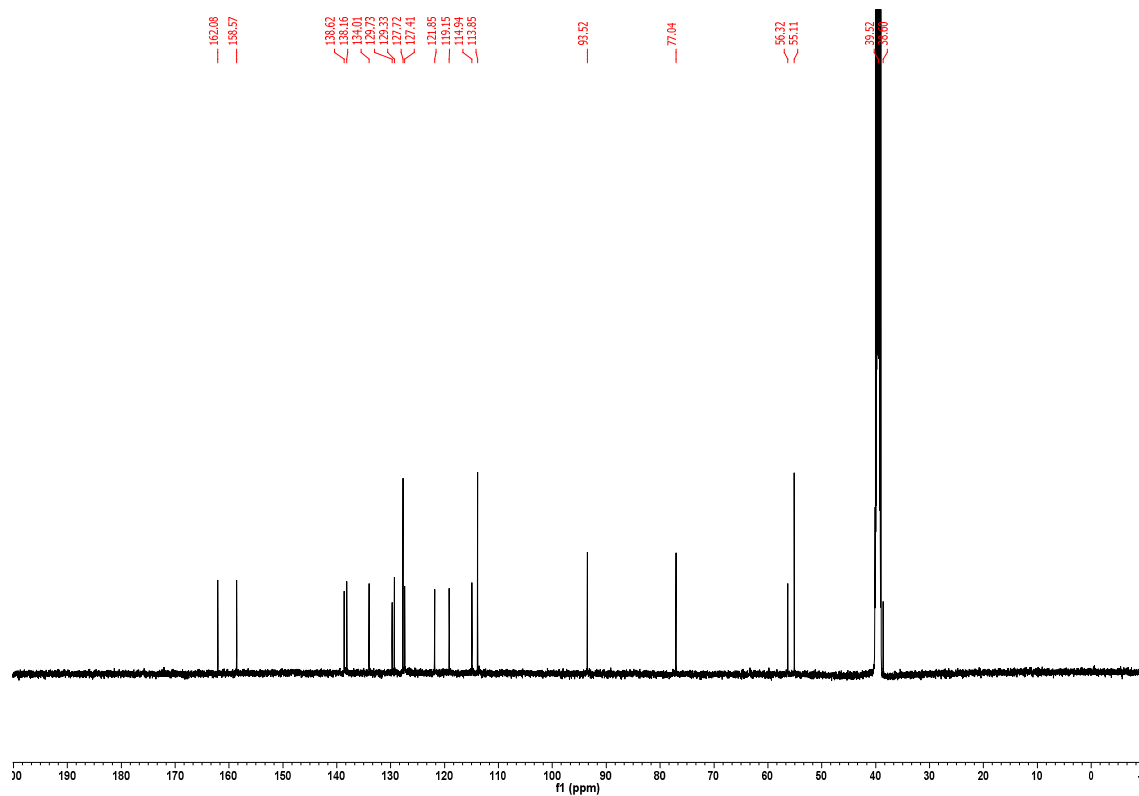

$^1\text{H}$  NMR (300 K,  $\text{CDCl}_3$ )

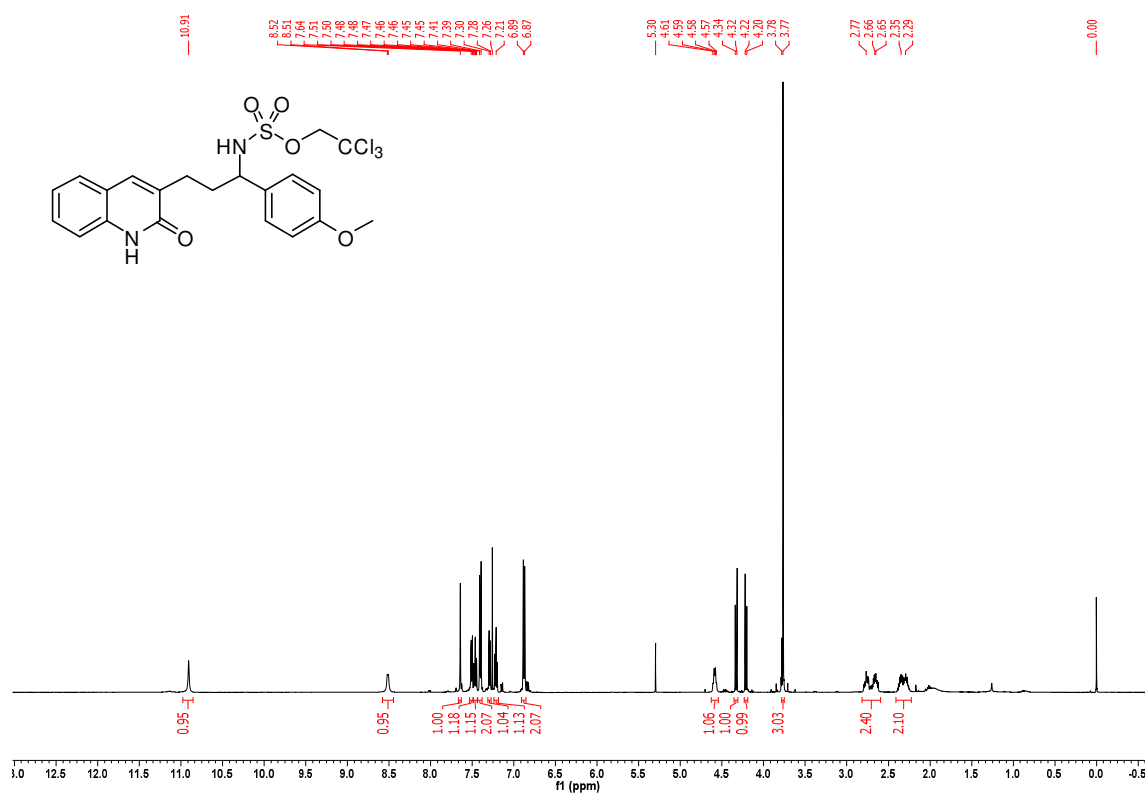

$^{13}\text{C}$  NMR (300 K,  $\text{CDCl}_3$ )

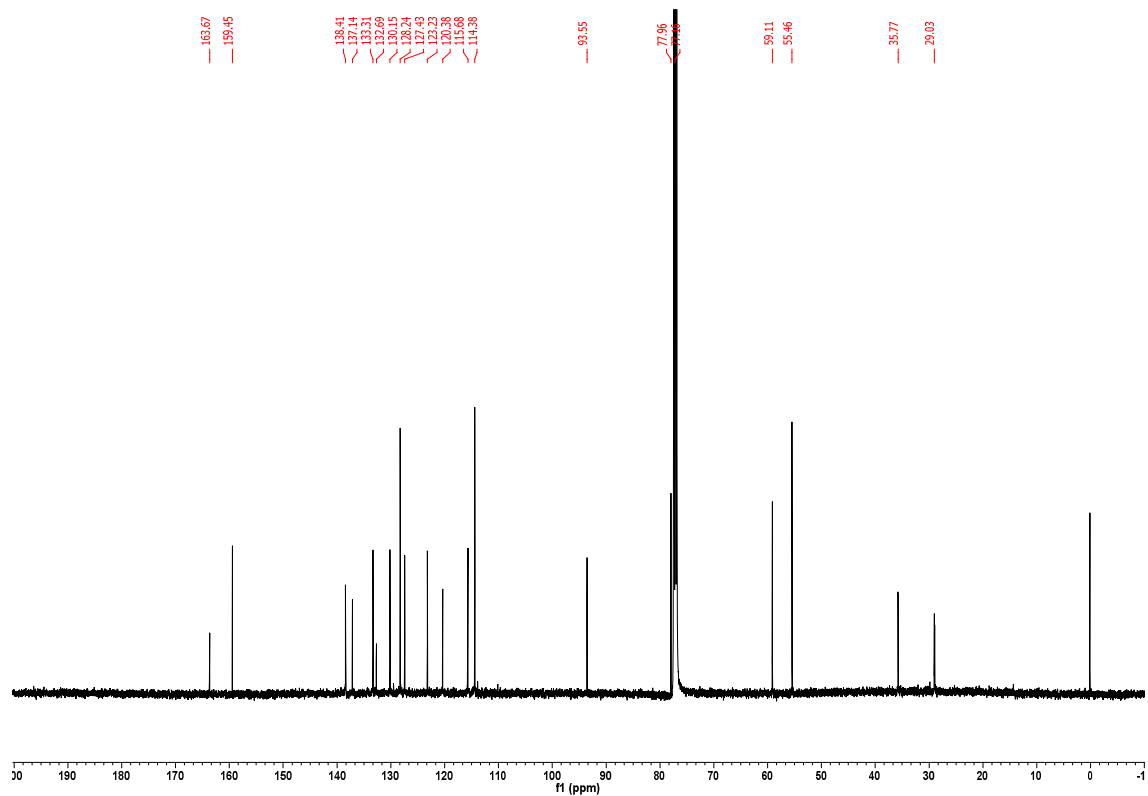

$^1\text{H}$  NMR (300 K,  $\text{CDCl}_3$ )

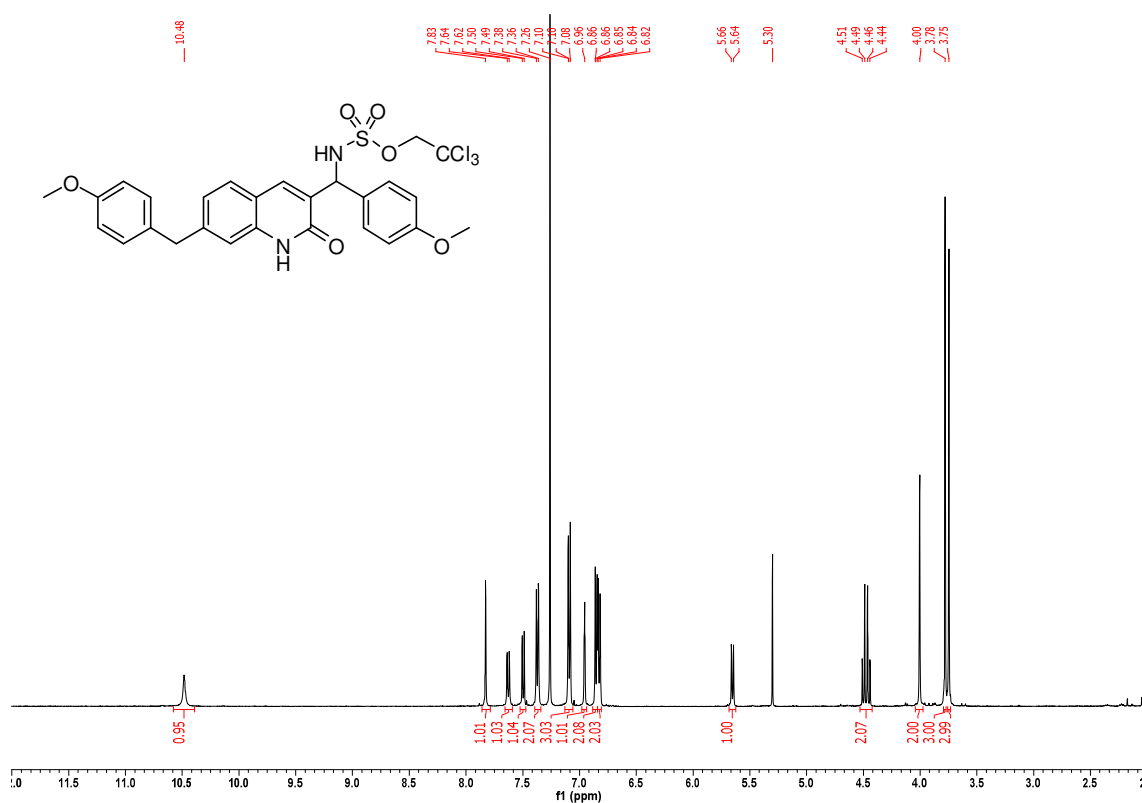

$^{13}\text{C}$  NMR (300 K,  $\text{CDCl}_3$ )

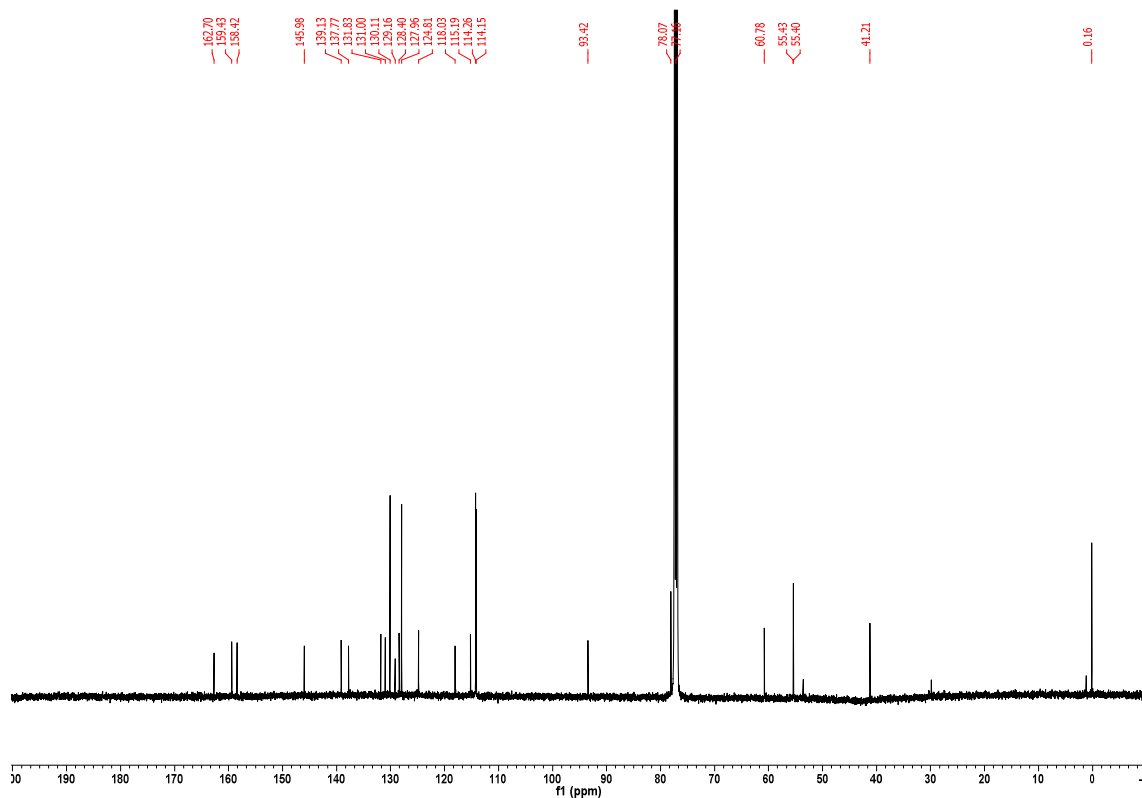





$^1\text{H}$  NMR (300 K,  $\text{CDCl}_3$ )

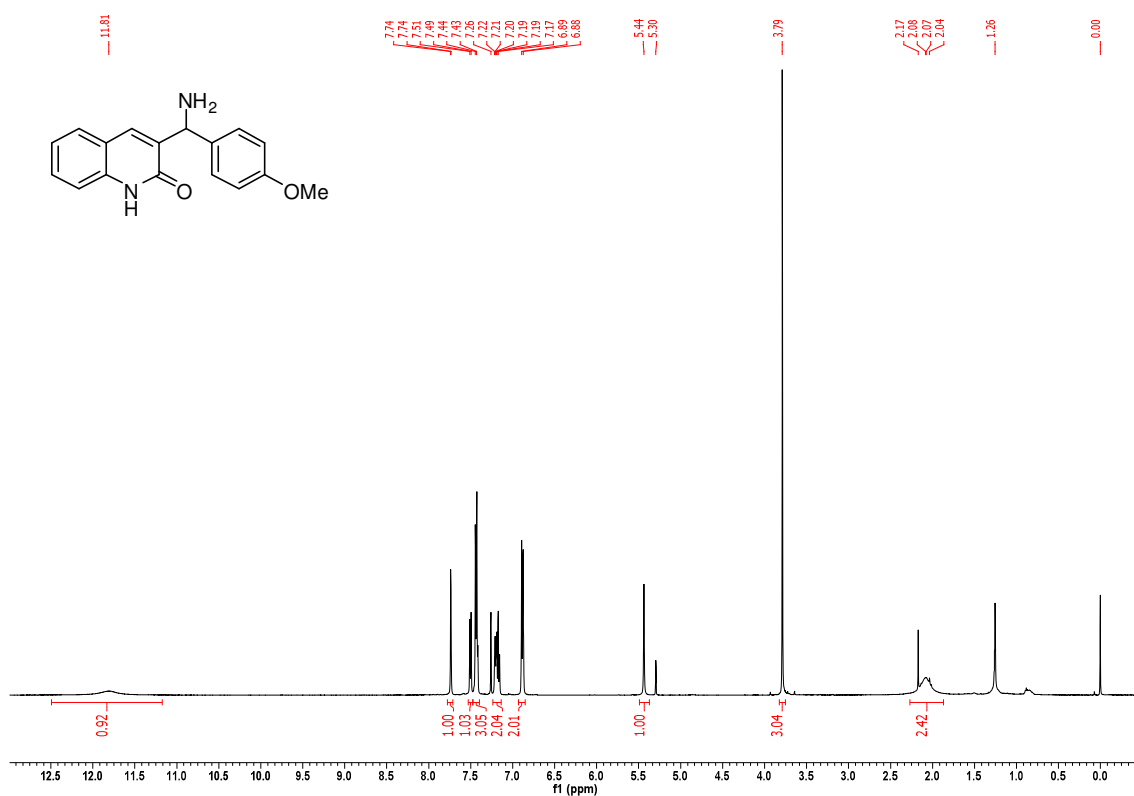

$^{13}\text{C}$  NMR (300 K,  $\text{CDCl}_3$ )

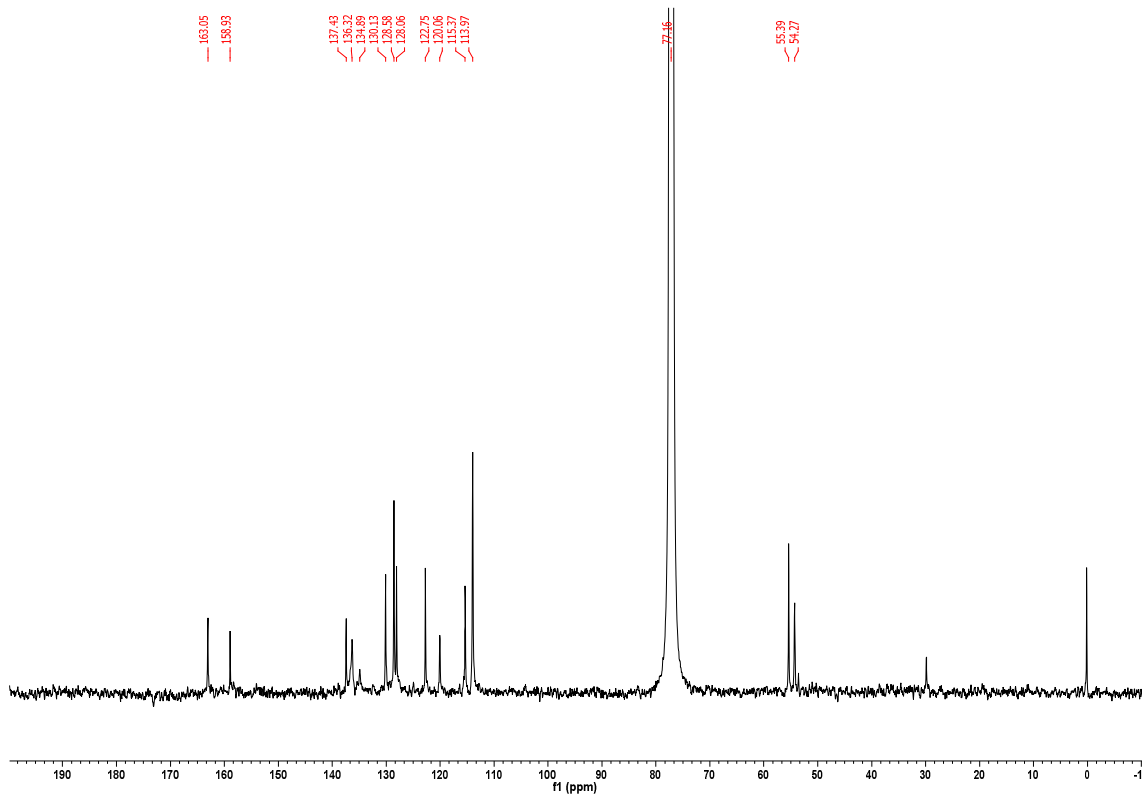

### 3. HPLC traces of chiral products

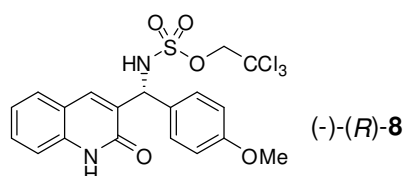

AD-H, 250 × 4.6 mm, *n*-hexane/*i*-PrOH = 50/50, 1 mL/min,  $\lambda$  = 210 nm

#### *Racemic product*

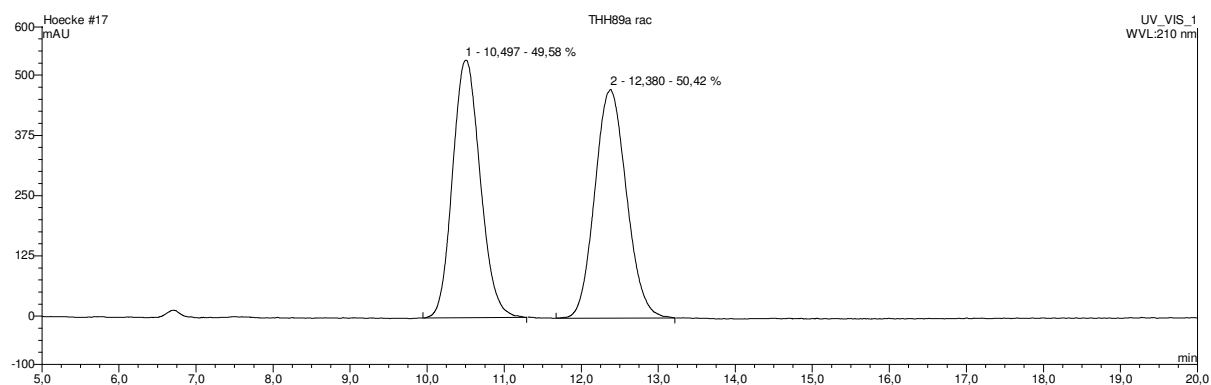

#### *Enantioenriched product (71% ee)*

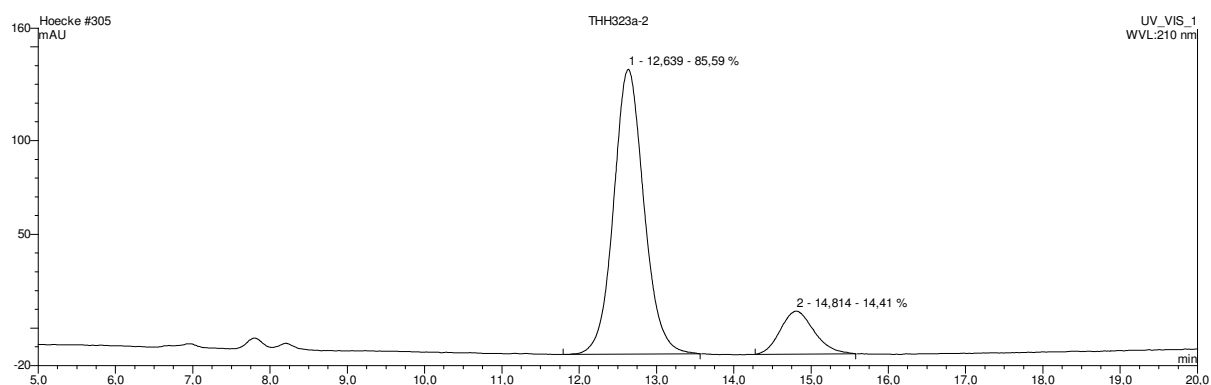

*Enantiomerically pure (-)-(R)-8* (>99% *ee*; after separation of the enantiomers by semipreparative HPLC on a chiral stationary phase; see procedure)

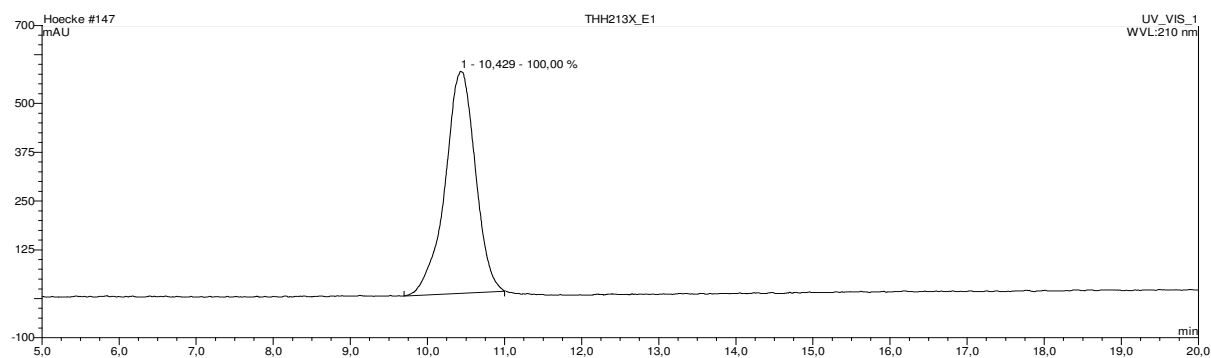

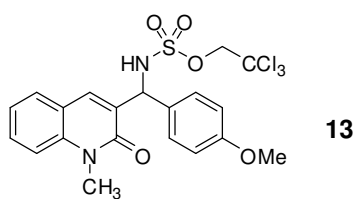

AD-H, 250 × 4.6 mm, *n*-hexane/*i*-PrOH = 50/50, 1 mL/min,  $\lambda$  = 210 nm

*Racemic product*

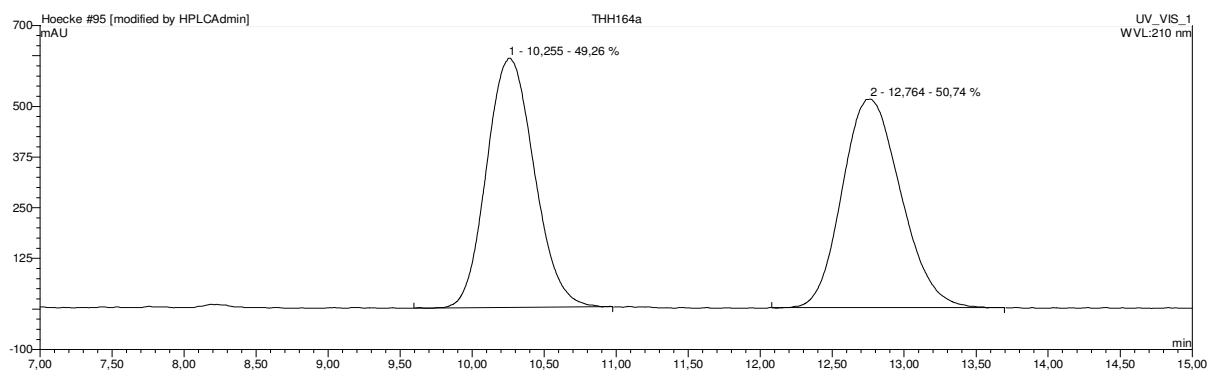

*Enantioenriched product (10% ee)*

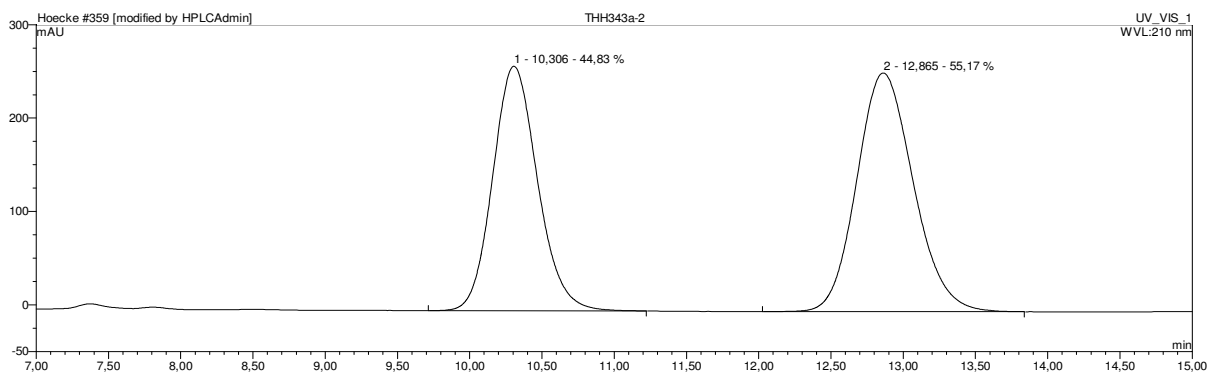

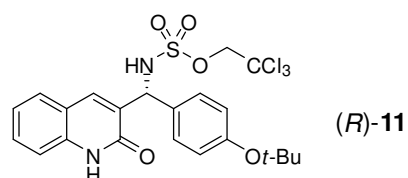

AD-H, 250 × 4.6 mm, *n*-hexane/*i*-PrOH = 70/30, 1 mL/min,  $\lambda$  = 210 nm

*Racemic product*

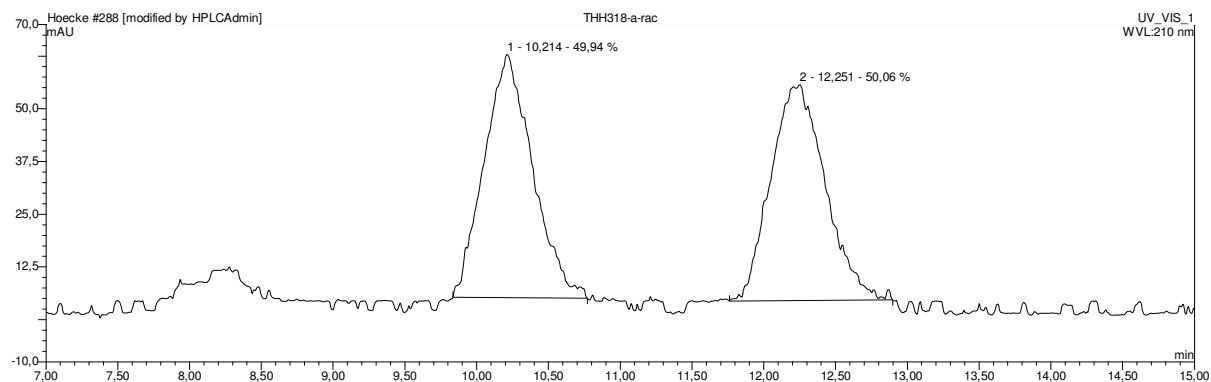

*Enantioenriched product (49% ee)*

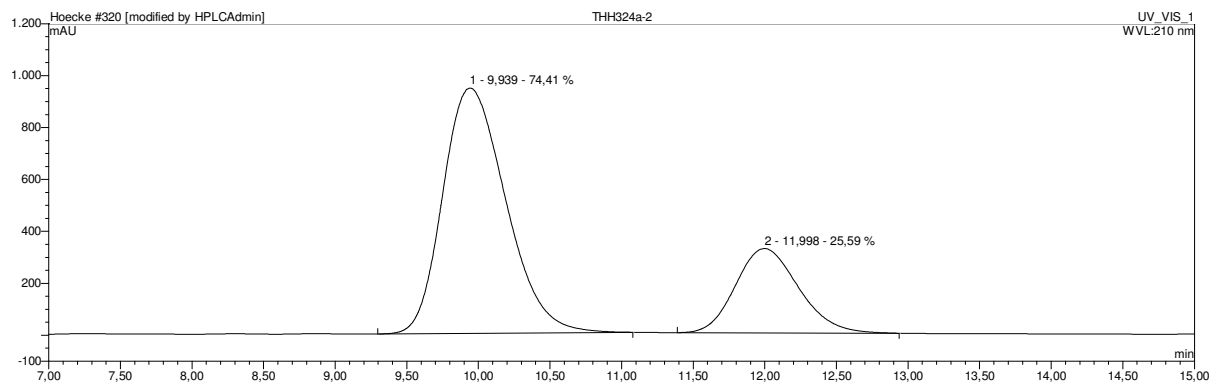

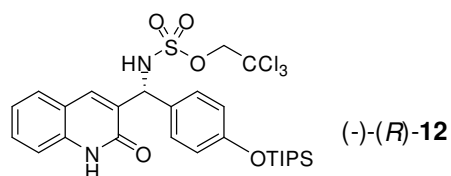

AS-RH, 150 × 4.6 mm, CH<sub>3</sub>CN/H<sub>2</sub>O = 20/80 → 100/0, 1 mL/min, λ = 254 nm

*Racemic product*

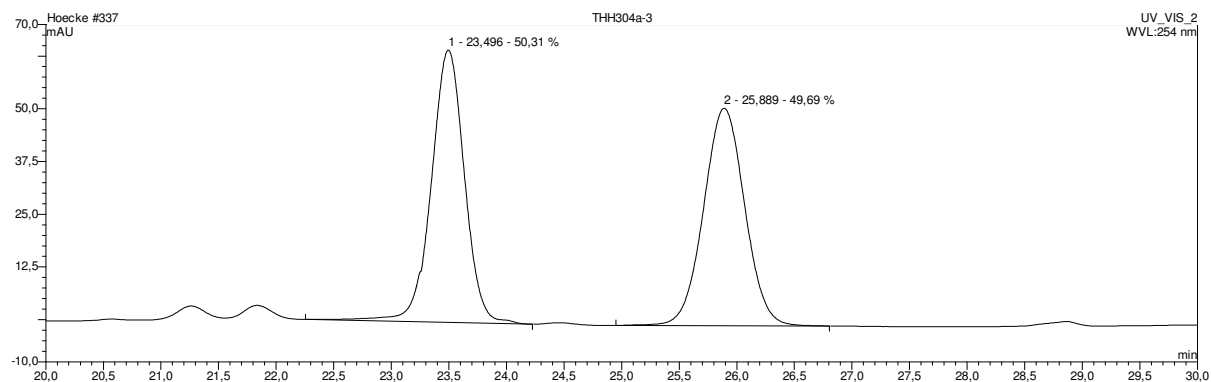

*Enantioenriched product (72% ee)*

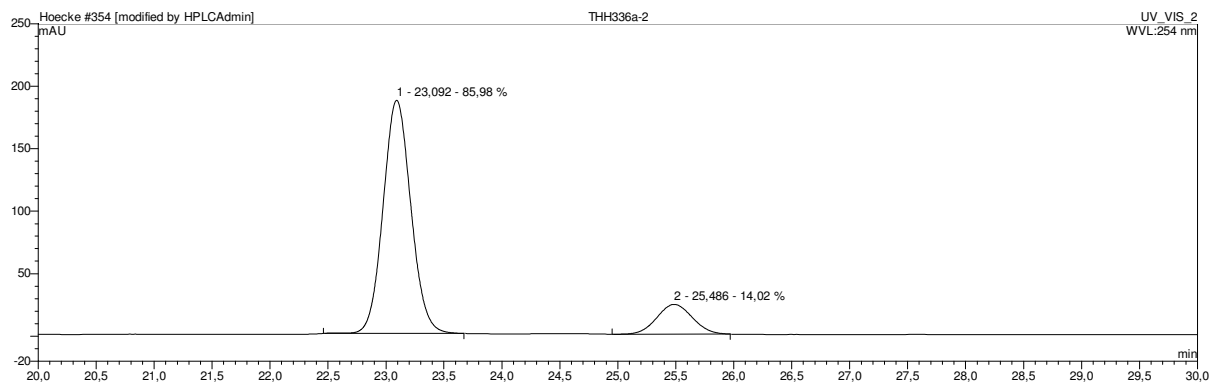

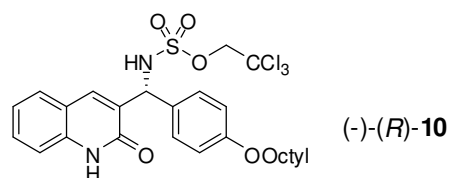

AD-H, 250 × 4.6 mm, *n*-hexane/*i*-PrOH = 70/30, 1 mL/min,  $\lambda$  = 210 nm

*Racemic product*

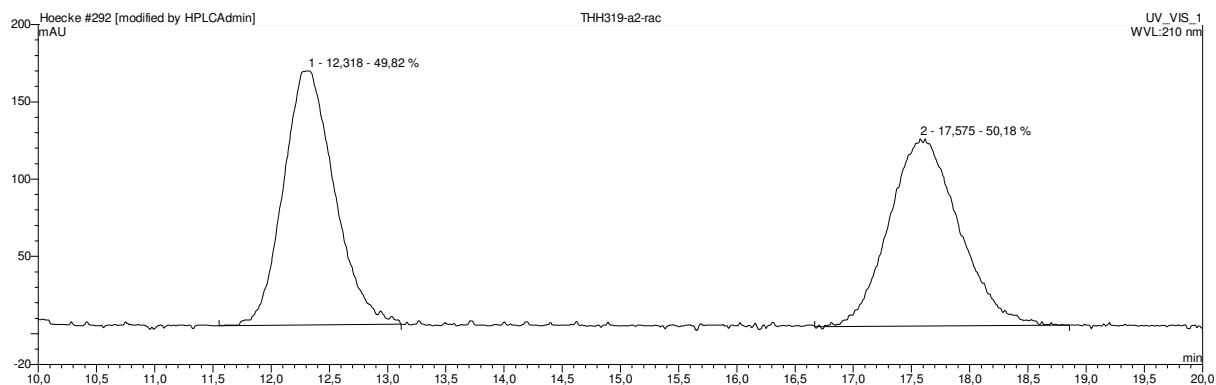

*Enantioenriched product (75% ee)*

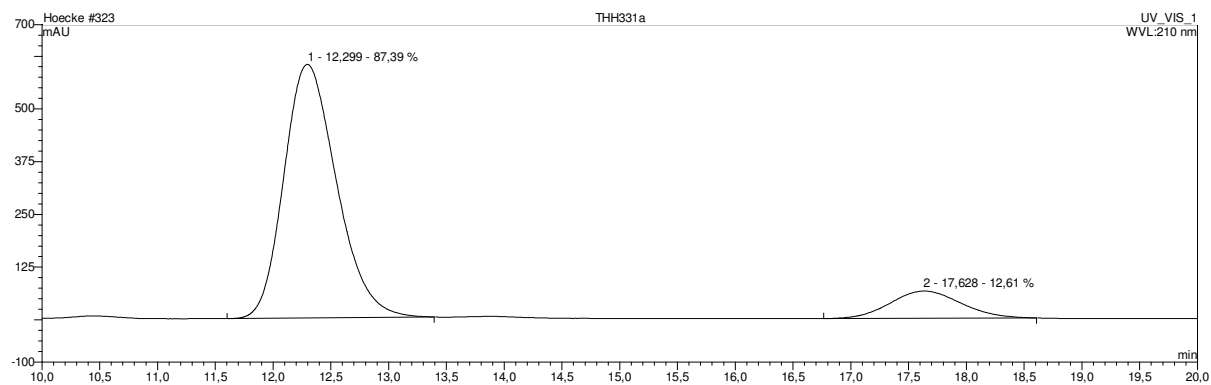

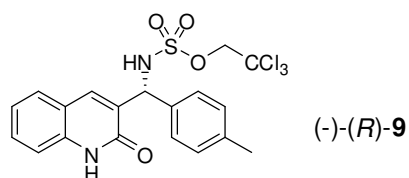

AD-H, 250 × 4.6 mm, *n*-hexane/*i*-PrOH = 70/30, 1 mL/min,  $\lambda$  = 210 nm

*Racemic product*

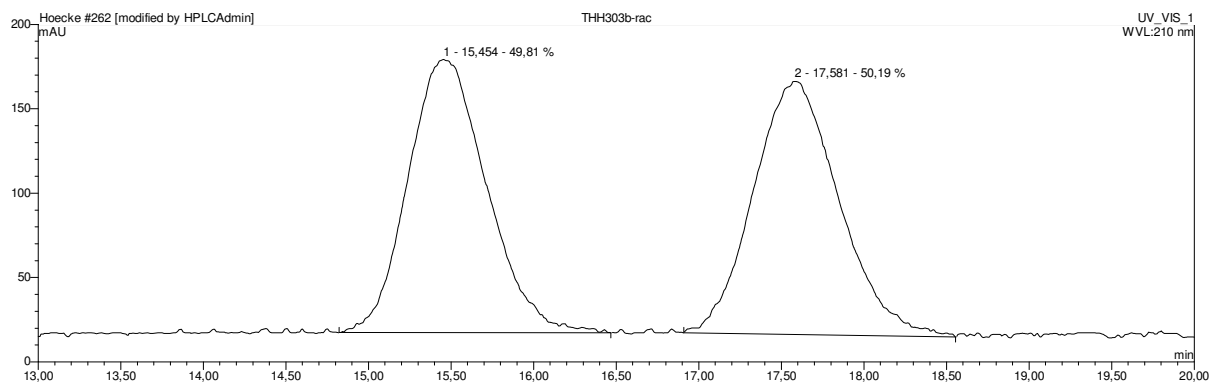

*Enantioenriched product (48% ee)*

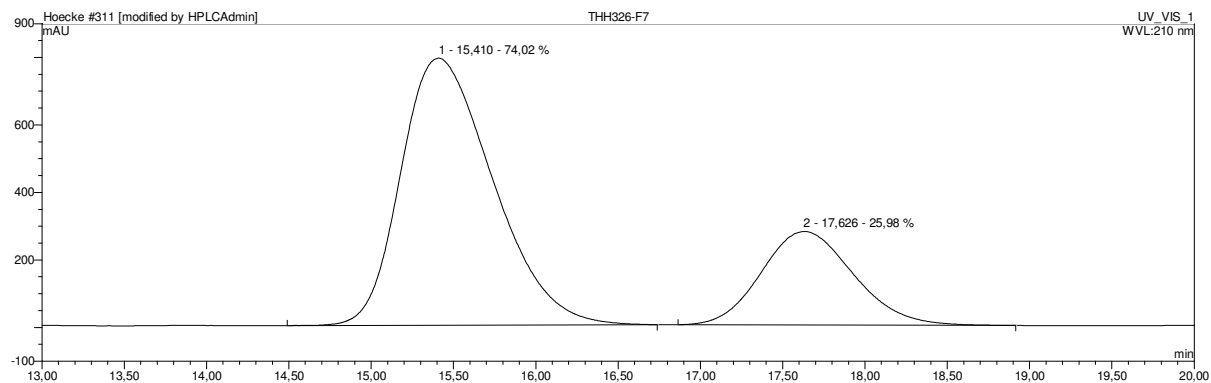

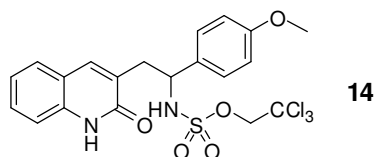

*Racemic product*

OD, 250 × 4.6 mm, hexane/*i*-PrOH = 70/30, 1 mL/min,  $\lambda$  = 210 nm

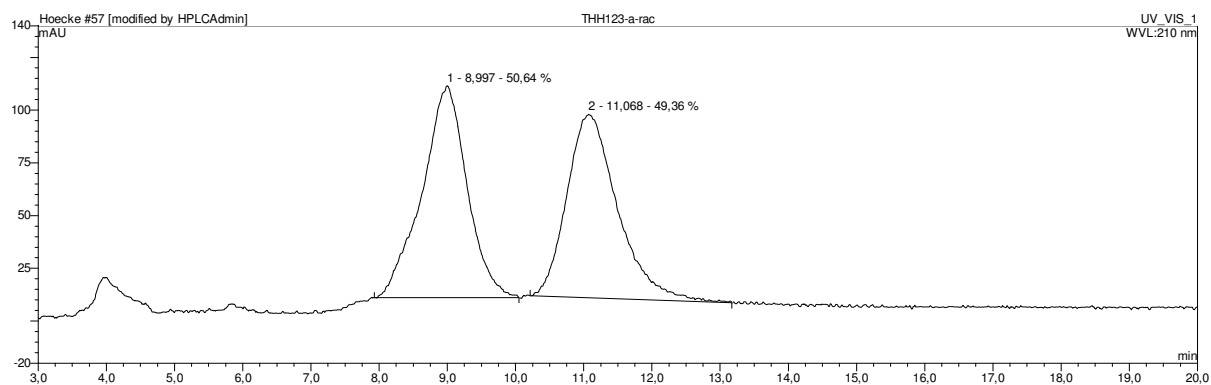

*Enantioenriched product (30% ee, second figure)*

OD, 250 × 4.6 mm, hexane/*i*-PrOH = 70/30, 1 mL/min,  $\lambda$  = 210 nm

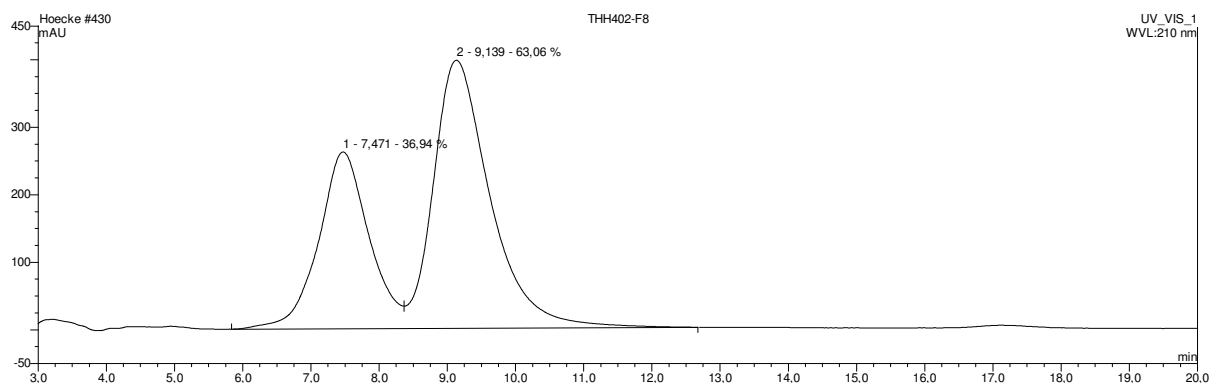

Due to changes in the separation performance of the column the conditions were slightly modified: OD, 250 × 4.6 mm, hexane/*i*-PrOH = 80/20, 1 mL/min,  $\lambda$  = 210 nm

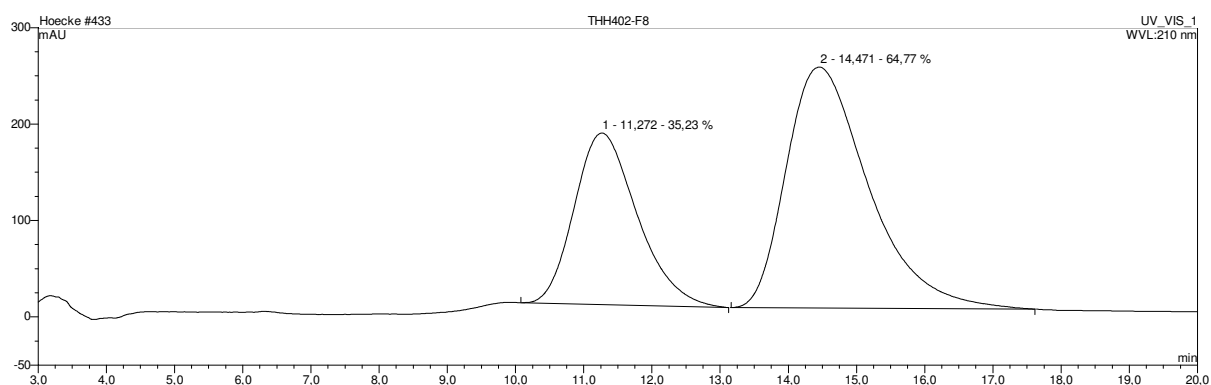



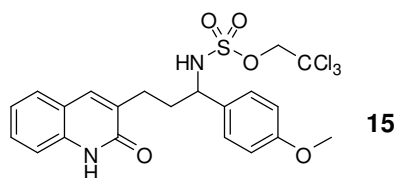

AD-H, 250 × 4.6 mm, *n*-hexane/*i*-PrOH = 50/50, 1 mL/min,  $\lambda$  = 210 nm

*Racemic product*

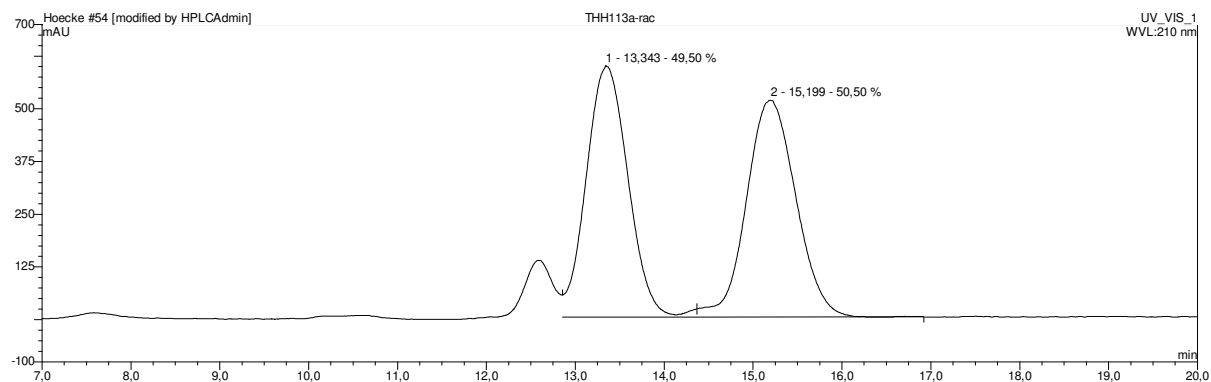

*Enantioenriched product (5% ee)*

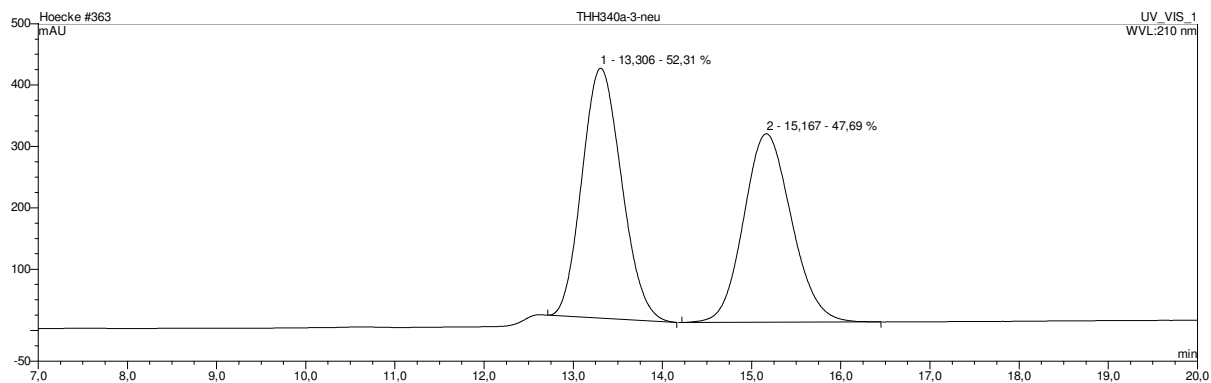

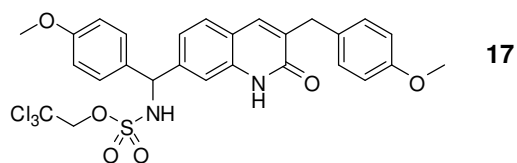

AD-H, 250 × 4.6 mm, *n*-hexane/*i*-PrOH = 50/50, 1 mL/min,  $\lambda$  = 210 nm

*Racemic product*

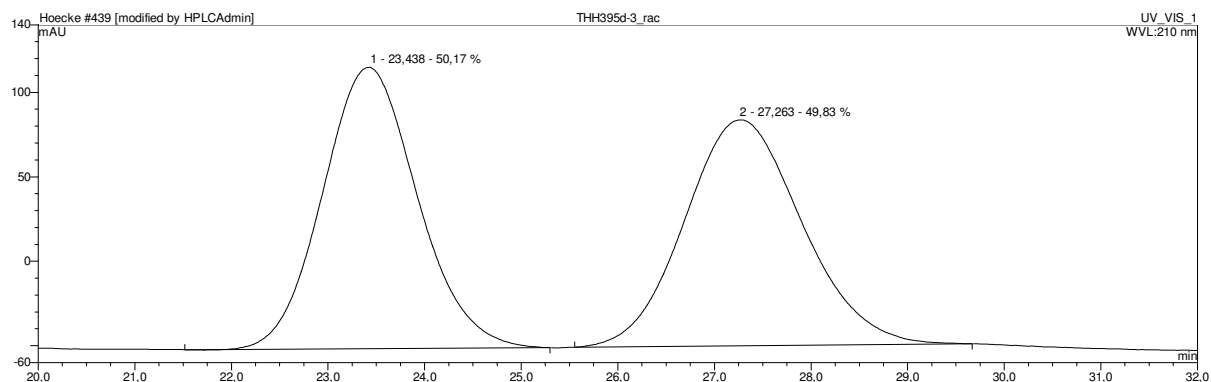

*Enantioenriched product (6.7% ee)*

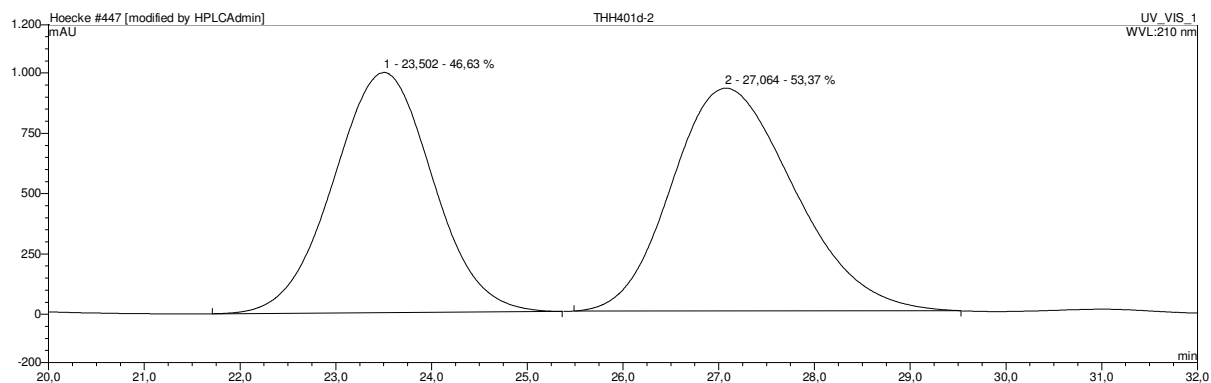

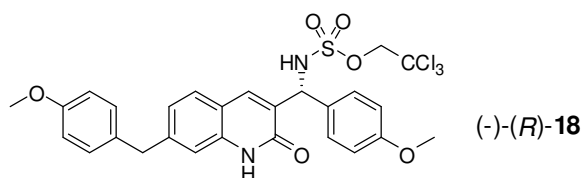

AD-H, 250 × 4.6 mm, *n*-hexane/*i*-PrOH = 50/50, 1 mL/min,  $\lambda$  = 254 nm

*Racemic product*

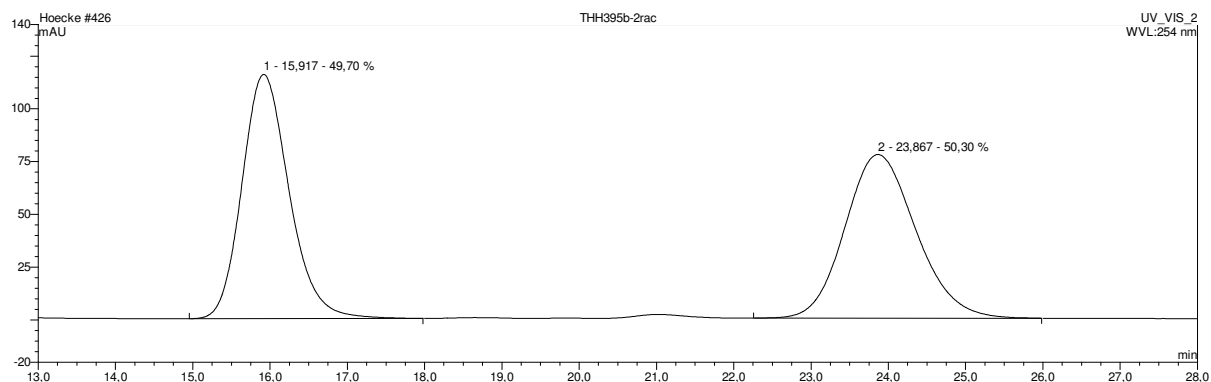

*Enantioenriched product (69% ee)*

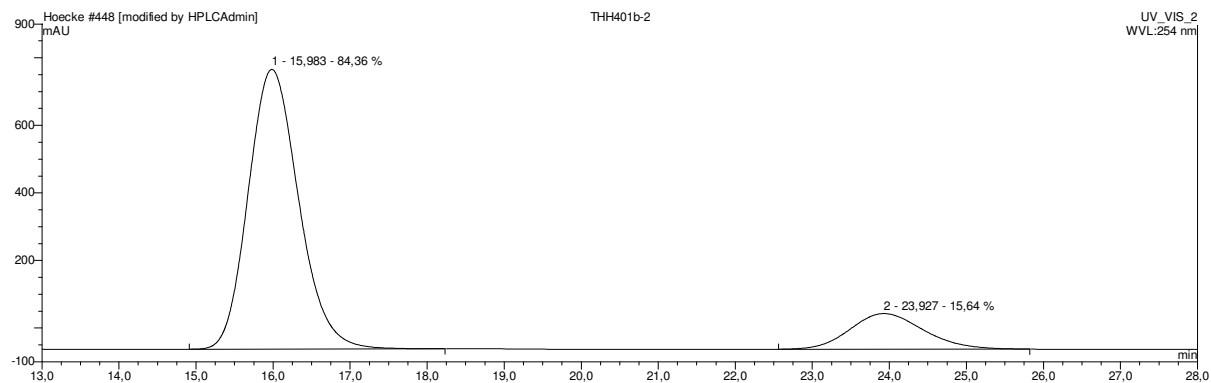

#### 4. Crystallographic data (Compound 4, Compound 6·2(DMSO)·(C<sub>6</sub>H<sub>14</sub>), Compound 8)

##### General information

Data were collected on an X-ray single crystal diffractometer equipped with a CCD detector (Bruker APEX II,  $\kappa$ -CCD), a rotating anode (Bruker AXS, FR591) with MoK $\alpha$  radiation ( $\lambda = 0.71073$  Å), and a graphite monochromator by using the SMART software package.<sup>[12]</sup> The measurements were performed on a single crystal coated with perfluorinated ether. The crystal was fixed on the top of a glass fiber and transferred to the diffractometer. The crystal was frozen under a stream of cold nitrogen. A matrix scan was used to determine the initial lattice parameters. Reflections were merged and corrected for Lorenz and polarization effects, scan speed, and background using SAINT.<sup>[13]</sup> Absorption corrections, including odd and even ordered spherical harmonics were performed using SADABS.<sup>[13]</sup> Space group assignments were based upon systematic absences, *E* statistics, and successful refinement of the structures. Structures were solved by direct methods with the aid of successive difference Fourier maps, and were refined against all data using WinGX<sup>[14]</sup> 7 based on SIR-92.<sup>[15]</sup> 3 If not mentioned otherwise, non-hydrogen atoms were refined with anisotropic displacement parameters. Methyl hydrogen atoms were refined as part of rigid rotating groups, with C–H = 0.98 Å and  $U_{\text{iso(H)}} = 1.5U_{\text{eq(C)}}$ . Other H atoms were placed in calculated positions and refined using a riding model, with methyne, methylene and aromatic C–H distances of 1.00, 0.99 and 0.95 Å, respectively, and  $U_{\text{iso(H)}} = 1.2 \cdot U_{\text{eq(C)}}$ . N–H distances were fixed at 0.88 Å with  $U_{\text{iso(H)}} = 1.2 \cdot U_{\text{eq(N)}}$ . Full-matrix least-squares refinements were carried out by minimizing  $\sum w(F_o^2 - F_c^2)^2$  with SHELXL-97<sup>[16]</sup> 5 weighting scheme. Neutral atom scattering factors for all atoms and anomalous dispersion corrections for the non-hydrogen atoms were taken from *International Tables for Crystallography*.<sup>[17]</sup> Images of the crystal structures were generated by PLATON.<sup>[18]</sup> CCDC 932341 (4), CCDC 932342 (6·2(DMSO) (C<sub>6</sub>H<sub>14</sub>)), and CCDC 932343 (8) contain the supplementary crystallographic data for this compound. The data can be obtained free of charge from the Cambridge Crystallographic Data Centre via [www.ccdc.cam.ac.uk/data\\_request/cif](http://www.ccdc.cam.ac.uk/data_request/cif) or via [https://www.ccdc.cam.ac.uk/services/structure\\_deposit/](https://www.ccdc.cam.ac.uk/services/structure_deposit/)

##### Special:

- 4: The correct enantiomer is proved by analyses of Bijvoet-Pair Differences Parameter. Hydrogen atoms are refined freely.

**6·2 DMSO·(C<sub>6</sub>H<sub>14</sub>):** Unresolvable solvent molecules (104 electrons; a mixture of pentane/hexane) had to be removed with the SQUEEZE procedure.<sup>[18]</sup>

The correct enantiomer is proved by Flack's Parameter. Therefore, the possible centrosymmetric space group P2<sub>1</sub>/c can be excluded.

**8** The correct enantiomer is proved by Flack's Parameter.

## Compound 4

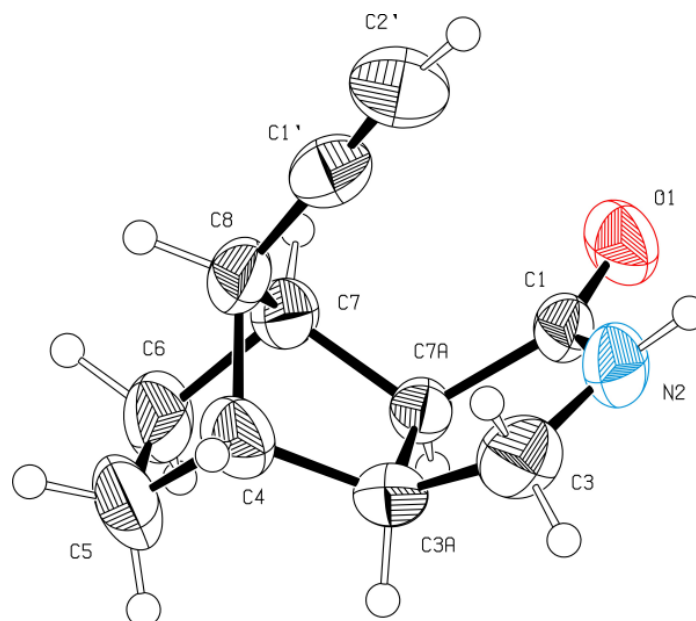

**Figure F2:** Ortep drawing of compound **4** with 50% ellipsoids.<sup>[18]</sup>

Operator: \*\*\* Herdtweck \*\*\*

Molecular Formula: C<sub>11</sub> H<sub>13</sub> N O

Crystal Color / Shape Colorless fragment

Crystal Size Approximate size of crystal fragment used for data collection:  
0.30 × 0.38 × 0.64 mm

Molecular Weight: 175.22 a.m.u.

F<sub>000</sub>: 752

Systematic Absences: 00l: l≠4n; h00: h≠2n

Space Group: Tetragonal *P* 4<sub>3</sub>2<sub>1</sub>2 (I.T.-No.: 96)

Cell Constants: Least-squares refinement of 9918 reflections with the programs "APEX suite" and "SAINT"<sup>[12,13]</sup>; theta range 1.76° < θ < 25.38°;

|                        |                                                                                                                                                                   |
|------------------------|-------------------------------------------------------------------------------------------------------------------------------------------------------------------|
|                        | Mo(K $\alpha$ ); $\lambda = 0.71073 \text{ \AA}$                                                                                                                  |
|                        | $a = 6.4211(1) \text{ \AA}$                                                                                                                                       |
|                        | $b = a$                                                                                                                                                           |
|                        | $c = 46.2039(9) \text{ \AA}$                                                                                                                                      |
|                        | $V = 1905.01(6) \text{ \AA}^3$ ; $Z = 8$ ; $D_{\text{calc}} = 1.222 \text{ g cm}^{-3}$ ; Mos. = 0.53                                                              |
| Diffraction:           | Kappa APEX II (Area Diffraction System; BRUKER AXS); rotating anode; graphite monochromator; 50 kV; 40 mA; $\lambda = 0.71073 \text{ \AA}$ ; Mo(K $\alpha$ )      |
| Temperature:           | (20 $\pm$ 1) °C; (293 $\pm$ 1) K                                                                                                                                  |
| Measurement Range:     | $1.76^\circ < \theta < 25.38^\circ$ ; h: -7/7, k: -7/7, l: -55/55                                                                                                 |
| Measurement Time:      | $2 \times 10 \text{ s}$ per film                                                                                                                                  |
| Measurement Mode:      | measured: 12 runs; 6627 films / scaled: 12 runs; 6627 films<br>$\phi$ - and $\omega$ -movement; Increment: $\Delta\phi/\Delta\omega = 0.50^\circ$ ; dx = 100.0 mm |
| LP - Correction:       | Yes <sup>[13]</sup>                                                                                                                                               |
| Intensity Correction:  | No/Yes; during scaling <sup>[13]</sup>                                                                                                                            |
| Absorption Correction: | Multi-scan; during scaling; $\mu = 0.078 \text{ mm}^{-1}$ <sup>[13]</sup>                                                                                         |
|                        | Correction Factors: $T_{\text{min}} = 0.6860$ $T_{\text{max}} = 0.7452$                                                                                           |
| Reflection Data:       | 29023 reflections were integrated and scaled                                                                                                                      |
|                        | 111 reflections systematic absent and rejected                                                                                                                    |
|                        | 28912 reflections to be merged                                                                                                                                    |
|                        | 1748 independent reflections                                                                                                                                      |
|                        | 0.033 $R_{\text{int}}$ : (basis $F_o^2$ )                                                                                                                         |
|                        | 1748 independent reflections (all) were used in refinements                                                                                                       |
|                        | 1718 independent reflections with $I_o > 2\sigma(I_o)$                                                                                                            |
|                        | 99.8% completeness of the data set                                                                                                                                |
|                        | 170 parameter full-matrix refinement                                                                                                                              |
|                        | 10.3 reflections per parameter                                                                                                                                    |
| Solution:              | Direct Methods <sup>[15]</sup> ; Difference Fourier syntheses                                                                                                     |
| Refinement Parameters: | In the asymmetric unit:                                                                                                                                           |
|                        | 13 Non-hydrogen atoms with anisotropic displacement parameters                                                                                                    |
|                        | 13 Hydrogen atoms with isotropic displacement                                                                                                                     |

# parameters

|                                   |                                                                                                                                                                                                                  |          |
|-----------------------------------|------------------------------------------------------------------------------------------------------------------------------------------------------------------------------------------------------------------|----------|
| Hydrogen Atoms:                   | All hydrogen atom positions were found in the difference map calculated from the model containing all non-hydrogen atoms. The hydrogen positions were refined with individual isotropic displacement parameters. |          |
| Atomic Form Factors:              | For neutral atoms and anomalous dispersion <sup>[17]</sup>                                                                                                                                                       |          |
| Extinction Correction:            | no                                                                                                                                                                                                               |          |
| Weighting Scheme:                 | $w^{-1} = \sigma^2(F_o^2) + (a * P)^2 + b * P$<br>with a: 0.0423; b: 0.5042; P: [Maximum(0 or $F_o^2$ ) + 2 * $F_c^2$ ]/3                                                                                        |          |
| Shift/Err:                        | Less than 0.001 in the last cycle of refinement:                                                                                                                                                                 |          |
| Resid. Electron Density:          | +0.12 e <sup>-</sup> /Å <sup>3</sup> ; -0.12 e <sup>-</sup> /Å <sup>3</sup>                                                                                                                                      |          |
| R1:                               | $\Sigma( F_o  -  F_c ) / \Sigma  F_o $                                                                                                                                                                           |          |
| [ $F_o > 4\sigma(F_o)$ ; N=1718]: |                                                                                                                                                                                                                  | = 0.0363 |
| [all reflctns; N=1748]:           |                                                                                                                                                                                                                  | = 0.0369 |
| wR2:                              | $[\Sigma w(F_o^2 - F_c^2)^2 / \Sigma w(F_o^2)^2]^{1/2}$                                                                                                                                                          |          |
| [ $F_o > 4\sigma(F_o)$ ; N=1718]: |                                                                                                                                                                                                                  | = 0.1050 |
| [all reflctns; N=1748]:           |                                                                                                                                                                                                                  | = 0.1055 |
| Goodness of fit:                  | $[\Sigma w(F_o^2 - F_c^2)^2 / (\text{NO-NV})]^{1/2}$                                                                                                                                                             |          |
|                                   |                                                                                                                                                                                                                  | = 1.155  |
| Flack's Parameter :               | $x = -1(2)$                                                                                                                                                                                                      |          |
| Remarks:                          | Refinement expression $\Sigma w(F_o^2 - F_c^2)^2$                                                                                                                                                                |          |

The correct enantiomer is proved Analyses of Bijvoet-Pair Differences:

```

Bayesian Statistics
Type ..... Gaussian
Select Pairs      550
P2(true)....      0.999
P3(true)....      0.910
P3(rac-twin)      0.089
P3(false) ..      0.001
G .....          1.6685
G (su) .....      0.7081
Hoof t y .....    -0.3
Hoof t (su) .      0.4

```

The correct enantiomer could **not** be proved by Flack's Parameter.

# Compound **6**·2(DMSO)·(C<sub>6</sub>H<sub>14</sub>)

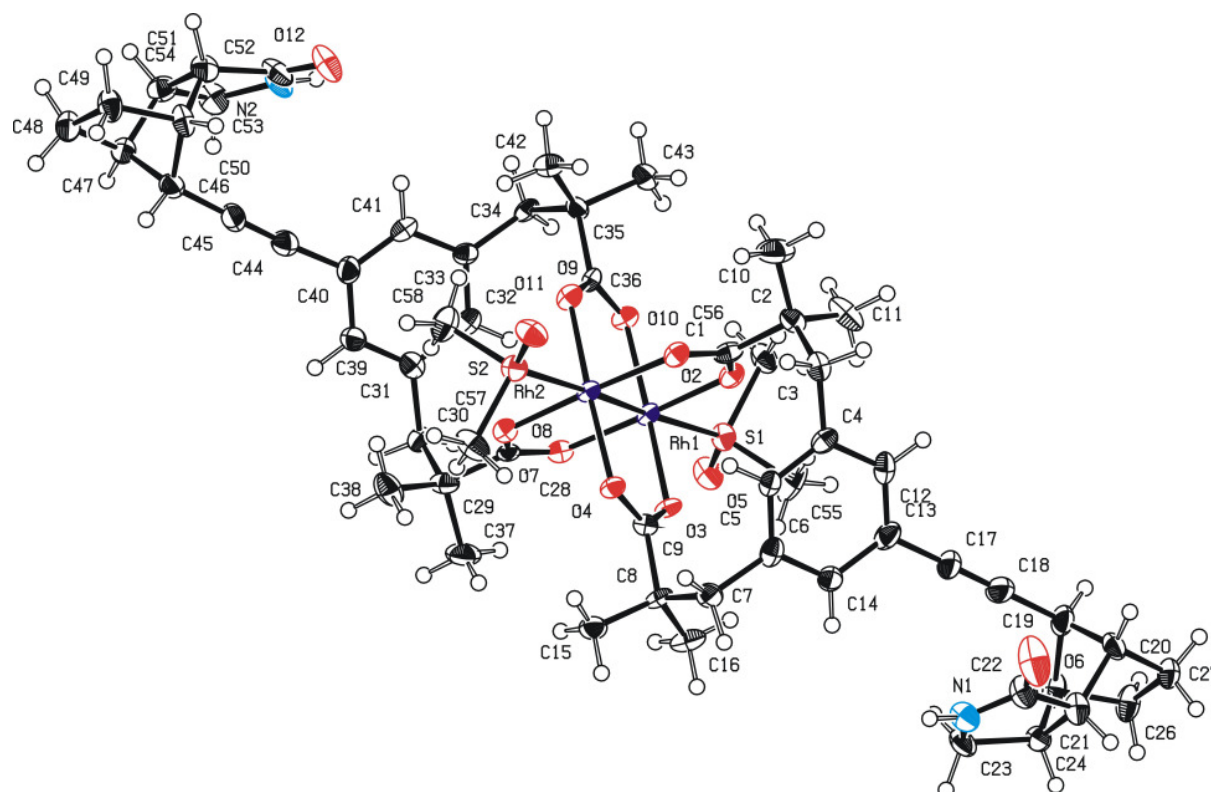

**Figure F3:** Ortep drawing drawing of compound **6**·2(DMSO)·(C<sub>6</sub>H<sub>14</sub>) with 50% ellipsoids.<sup>[18]</sup>

|                       |                                                                                                                                                                                                                                                                             |
|-----------------------|-----------------------------------------------------------------------------------------------------------------------------------------------------------------------------------------------------------------------------------------------------------------------------|
| Operator:             | *** Herdtweck ***                                                                                                                                                                                                                                                           |
| Molecular Formula:    | C <sub>64</sub> H <sub>88</sub> N <sub>2</sub> O <sub>12</sub> Rh <sub>2</sub> S <sub>2</sub>                                                                                                                                                                               |
| Crystal Color / Shape | Red plate                                                                                                                                                                                                                                                                   |
| Crystal Size          | Approximate size of crystal fragment used for data collection:<br>0.08 × 0.20 × 0.51 mm                                                                                                                                                                                     |
| Molecular Weight:     | 1347.27 a.m.u.                                                                                                                                                                                                                                                              |
| F <sub>000</sub> :    | 1408                                                                                                                                                                                                                                                                        |
| Systematic Absences:  | 0k0: k≠2n                                                                                                                                                                                                                                                                   |
| Space Group:          | Monoclinic <i>P</i> 2 <sub>1</sub> (I.T.-No.: 4)                                                                                                                                                                                                                            |
| Cell Constants:       | Least-squares refinement of 9864 reflections with the programs<br>"APEX suite" and "SAINT" <sup>[12,13]</sup> ; theta range 0.74° < $\theta$ < 25.43°;<br>Mo(K $\alpha$ ); $\lambda$ = 0.71073 Å<br><i>a</i> = 9.8534(2) Å<br><i>b</i> = 11.5276(3) Å $\beta$ = 98.7291(9)° |



|                        |                                                                                                                                                                                                                                                                                     |
|------------------------|-------------------------------------------------------------------------------------------------------------------------------------------------------------------------------------------------------------------------------------------------------------------------------------|
|                        | $c = 27.9228(7) \text{ \AA}$                                                                                                                                                                                                                                                        |
|                        | $V = 3134.90(13) \text{ \AA}^3$ ; $Z = 2$ ; $D_{\text{calc}} = 1.427 \text{ g cm}^{-3}$ ; Mos. = 0.61                                                                                                                                                                               |
| Diffractometer:        | Kappa APEX II (Area Diffraction System; BRUKER AXS); rotating anode; graphite monochromator; 50 kV; 40 mA; $\lambda = 0.71073 \text{ \AA}$ ; Mo( $\text{K}\alpha$ )                                                                                                                 |
| Temperature:           | (-150±1) °C; (123±1) K                                                                                                                                                                                                                                                              |
| Measurement Range:     | $0.74^\circ < \theta < 25.43^\circ$ ; h: -11/11, k: -13/13, l: -33/33                                                                                                                                                                                                               |
| Measurement Time:      | $2 \times 5 \text{ s}$ per film                                                                                                                                                                                                                                                     |
| Measurement Mode:      | measured: 14 runs; 5576 films / scaled: 14 runs; 5576 films<br>$\varphi$ - and $\omega$ -movement; Increment: $\Delta\varphi/\Delta\omega = 0.50^\circ$ ; dx = 55.0 mm                                                                                                              |
| LP - Correction:       | Yes <sup>[13]</sup>                                                                                                                                                                                                                                                                 |
| Intensity Correction   | No/Yes; during scaling <sup>[13]</sup>                                                                                                                                                                                                                                              |
| Absorption Correction: | Multi-scan; during scaling; $\mu = 0.700 \text{ mm}^{-1}$ <sup>[13]</sup>                                                                                                                                                                                                           |
|                        | Correction Factors: $T_{\text{min}} = 0.6785$ $T_{\text{max}} = 0.7452$                                                                                                                                                                                                             |
| Reflection Data:       | 83180 reflections were integrated and scaled                                                                                                                                                                                                                                        |
|                        | 75 reflections systematic absent and rejected                                                                                                                                                                                                                                       |
|                        | 83105 reflections to be merged                                                                                                                                                                                                                                                      |
|                        | 11542 independent reflections                                                                                                                                                                                                                                                       |
|                        | 0.025 $R_{\text{int}}$ : (basis $F_o^2$ )                                                                                                                                                                                                                                           |
|                        | 11542 independent reflections (all) were used in refinements                                                                                                                                                                                                                        |
|                        | 11246 independent reflections with $I_o > 2\sigma(I_o)$                                                                                                                                                                                                                             |
|                        | 99.6% completeness of the data set                                                                                                                                                                                                                                                  |
|                        | 697 parameter full-matrix refinement                                                                                                                                                                                                                                                |
|                        | 16.6 reflections per parameter                                                                                                                                                                                                                                                      |
| Solution:              | Direct Methods <sup>[15]</sup> ; Difference Fourier syntheses                                                                                                                                                                                                                       |
| Refinement Parameters: | In the asymmetric unit:                                                                                                                                                                                                                                                             |
|                        | 76 Non-hydrogen atoms with anisotropic displacement parameters                                                                                                                                                                                                                      |
| Hydrogen Atoms:        | In the difference map(s) calculated from the model containing all non-hydrogen atoms, not all of the hydrogen positions could be determined from the highest peaks. For this reason, the hydrogen atoms were placed in calculated positions ( $d_{\text{C-H}} = 0.95, 0.98, 0.99$ , |

1.00 Å;  $d_{N-H} = 0.88$  Å). Isotropic displacement parameters were calculated from the parent carbon atom ( $U_H = 1.2/1.5 U_C$ ;  $U_H = 1.2 U_N$ ). The hydrogen atoms were included in the structure factor calculations but not refined.

|                                   |                                                                                                                                                                                                    |          |
|-----------------------------------|----------------------------------------------------------------------------------------------------------------------------------------------------------------------------------------------------|----------|
| Removing solvent molecules        | Unresolvable solvent molecules (104 electrons; a mixture of pentane/hexane) had to be removed with the SQUEEZE procedure. <sup>[18]</sup>                                                          |          |
| Atomic Form Factors:              | For neutral atoms and anomalous dispersion <sup>[17]</sup>                                                                                                                                         |          |
| Extinction Correction:            | no                                                                                                                                                                                                 |          |
| Weighting Scheme:                 | $w^{-1} = \sigma^2(F_o^2) + (a*P)^2 + b*P$<br>with a: 0.0239; b: 1.2657; P: $[\text{Maximum}(0 \text{ or } F_o^2) + 2*F_c^2]/3$                                                                    |          |
| Shift/Err:                        | Less than 0.002 in the last cycle of refinement:                                                                                                                                                   |          |
| Resid. Electron Density:          | $+0.39 \text{ e}^-/\text{\AA}^3$ ; $-0.32 \text{ e}^-/\text{\AA}^3$                                                                                                                                |          |
| R1:                               | $\Sigma( F_o  -  F_c )/\Sigma F_o $                                                                                                                                                                |          |
| $[F_o > 4\sigma(F_o)$ ; N=11246]: |                                                                                                                                                                                                    | = 0.0186 |
| [all reflctns; N=11542]:          |                                                                                                                                                                                                    | = 0.0192 |
| wR2:                              | $[\Sigma w(F_o^2 - F_c^2)^2 / \Sigma w(F_o^2)^2]^{1/2}$                                                                                                                                            |          |
| $[F_o > 4\sigma(F_o)$ ; N=11246]: |                                                                                                                                                                                                    | = 0.0492 |
| [all reflctns; N=11542]:          |                                                                                                                                                                                                    | = 0.0497 |
| Goodness of fit:                  | $[\Sigma w(F_o^2 - F_c^2)^2 / (\text{NO}-\text{NV})]^{1/2}$                                                                                                                                        | = 1.055  |
| Flack's Parameter :               | $x = 0.04(2)$                                                                                                                                                                                      |          |
| Remarks:                          | Refinement expression $\Sigma w(F_o^2 - F_c^2)^2$<br>The correct enantiomer is proved by Flack's Parameter. Therefore the possible centrosymmetric space group P2 <sub>1</sub> /c can be excluded. |          |

## Compound 8

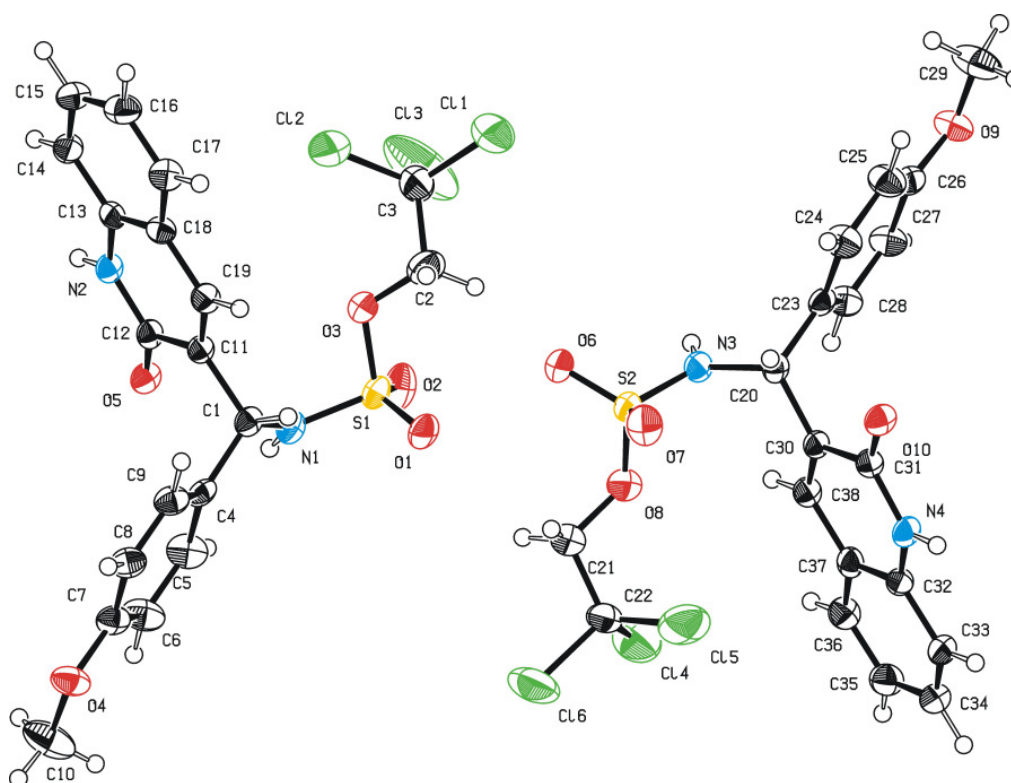

**Figure F4:** Ortep drawing drawing of compound **8** with 50% ellipsoids.<sup>[18]</sup>

|                       |                                                                                                                                                                                                  |              |                         |
|-----------------------|--------------------------------------------------------------------------------------------------------------------------------------------------------------------------------------------------|--------------|-------------------------|
| Operator:             | *** Herdtweck ***                                                                                                                                                                                |              |                         |
| Molecular Formula:    | C <sub>19</sub> H <sub>17</sub> Cl <sub>3</sub> N <sub>2</sub> O <sub>5</sub> S                                                                                                                  |              |                         |
| Crystal Color / Shape | Colorless fragment                                                                                                                                                                               |              |                         |
| Crystal Size          | Approximate size of crystal fragment used for data collection:<br>0.20 × 0.36 × 0.46 mm                                                                                                          |              |                         |
| Molecular Weight:     | 491.77 a.m.u.                                                                                                                                                                                    |              |                         |
| F <sub>000</sub> :    | 504                                                                                                                                                                                              |              |                         |
| Systematic Absences:  | none                                                                                                                                                                                             |              |                         |
| Space Group:          | Triclinic                                                                                                                                                                                        | <i>P</i> 1   | (I.T.-No.: 1)           |
| Cell Constants:       | Least-squares refinement of 9756 reflections with the programs<br>"APEX suite" and "SAINT" <sup>[12,13]</sup> ; theta range 1.50° < $\theta$ < 25.45°;<br>Mo(K $\alpha$ ); $\lambda$ = 0.71073 Å |              |                         |
|                       | <i>a</i> =                                                                                                                                                                                       | 6.4438(2) Å  | $\alpha$ = 78.9069(15)° |
|                       | <i>b</i> =                                                                                                                                                                                       | 12.5194(4) Å | $\beta$ = 86.3426(14)°  |
|                       | <i>c</i> =                                                                                                                                                                                       | 13.8216(5) Å | $\gamma$ = 75.5645(13)° |

|                        |                                                                                                                                                                                                                                                                                                                                                                                                                                                                                           |
|------------------------|-------------------------------------------------------------------------------------------------------------------------------------------------------------------------------------------------------------------------------------------------------------------------------------------------------------------------------------------------------------------------------------------------------------------------------------------------------------------------------------------|
|                        | $V = 1059.50(6) \text{ \AA}^3$ ; $Z = 2$ ; $D_{\text{calc}} = 1.541 \text{ g cm}^{-3}$ ; $\text{Mos.} = 0.74$                                                                                                                                                                                                                                                                                                                                                                             |
| Diffraction:           | Kappa APEX II (Area Diffraction System; BRUKER AXS); rotating anode; graphite monochromator; 50 kV; 40 mA; $\lambda = 0.71073 \text{ \AA}$ ; Mo( $\text{K}\alpha$ )                                                                                                                                                                                                                                                                                                                       |
| Temperature:           | $(-100 \pm 1) ^\circ\text{C}$ ; $(173 \pm 1) \text{ K}$                                                                                                                                                                                                                                                                                                                                                                                                                                   |
| Measurement Range:     | $1.50^\circ < \theta < 25.45^\circ$ ; h: -7/7, k: -15/15, l: -16/16                                                                                                                                                                                                                                                                                                                                                                                                                       |
| Measurement Time:      | $2 \times 7.50 \text{ s per film}$                                                                                                                                                                                                                                                                                                                                                                                                                                                        |
| Measurement Mode:      | measured: 8 runs; 4270 films / scaled: 8 runs; 4270 films<br>$\phi$ - and $\omega$ -movement; Increment: $\Delta\phi/\Delta\omega = 0.50^\circ$ ; $dx = 45.0 \text{ mm}$                                                                                                                                                                                                                                                                                                                  |
| LP - Correction:       | Yes <sup>[13]</sup>                                                                                                                                                                                                                                                                                                                                                                                                                                                                       |
| Intensity Correction   | No/Yes; during scaling <sup>[13]</sup>                                                                                                                                                                                                                                                                                                                                                                                                                                                    |
| Absorption Correction: | Multi-scan; during scaling; $\mu = 0.566 \text{ mm}^{-1}$ <sup>[13]</sup>                                                                                                                                                                                                                                                                                                                                                                                                                 |
|                        | Correction Factors: $T_{\text{min}} = 0.6772$ $T_{\text{max}} = 0.7452$                                                                                                                                                                                                                                                                                                                                                                                                                   |
| Reflection Data:       | 29669 reflections were integrated and scaled                                                                                                                                                                                                                                                                                                                                                                                                                                              |
|                        | 29669 reflections to be merged                                                                                                                                                                                                                                                                                                                                                                                                                                                            |
|                        | 7744 independent reflections                                                                                                                                                                                                                                                                                                                                                                                                                                                              |
|                        | 0.029 $R_{\text{int}}$ : (basis $F_o^2$ )                                                                                                                                                                                                                                                                                                                                                                                                                                                 |
|                        | 7744 independent reflections (all) were used in refinements                                                                                                                                                                                                                                                                                                                                                                                                                               |
|                        | 7683 independent reflections with $I_o > 2\sigma(I_o)$                                                                                                                                                                                                                                                                                                                                                                                                                                    |
|                        | 98.5% completeness of the data set                                                                                                                                                                                                                                                                                                                                                                                                                                                        |
|                        | 543 parameter full-matrix refinement                                                                                                                                                                                                                                                                                                                                                                                                                                                      |
|                        | 14.3 reflections per parameter                                                                                                                                                                                                                                                                                                                                                                                                                                                            |
| Solution:              | Direct Methods <sup>[15]</sup> ; Difference Fourier syntheses                                                                                                                                                                                                                                                                                                                                                                                                                             |
| Refinement Parameters: | In the asymmetric unit:                                                                                                                                                                                                                                                                                                                                                                                                                                                                   |
|                        | 60 Non-hydrogen atoms with anisotropic displacement parameters                                                                                                                                                                                                                                                                                                                                                                                                                            |
| Hydrogen Atoms:        | In the difference map(s) calculated from the model containing all non-hydrogen atoms, not all of the hydrogen positions could be determined from the highest peaks. For this reason, the hydrogen atoms were placed in calculated positions ( $d_{\text{C-H}} = 0.95, 0.98, 0.99, 1.00 \text{ \AA}$ , $d_{\text{N-H}} = 0.88 \text{ \AA}$ ). Isotropic displacement parameters were calculated from the parent carbon atom ( $U_{\text{H}} = 1.2/1.5 U_{\text{C}}$ , $U_{\text{H}} = 1.2$ |

|                                   |                                                                                                                           |          |
|-----------------------------------|---------------------------------------------------------------------------------------------------------------------------|----------|
|                                   | U <sub>N</sub> ). The hydrogen atoms were included in the structure factor calculations but not refined.                  |          |
| Atomic Form Factors:              | For neutral atoms and anomalous dispersion <sup>[17]</sup>                                                                |          |
| Extinction Correction:            | no                                                                                                                        |          |
| Weighting Scheme:                 | $w^{-1} = \sigma^2(F_o^2) + (a * P)^2 + b * P$<br>with a: 0.0680; b: 0.7404; P: [Maximum(0 or $F_o^2$ ) + 2 * $F_c^2$ ]/3 |          |
| Shift/Err:                        | Less than 0.001 in the last cycle of refinement:                                                                          |          |
| Resid. Electron Density:          | +0.84 e <sup>-</sup> /Å <sup>3</sup> ; -0.73 e <sup>-</sup> /Å <sup>3</sup>                                               |          |
| R1:                               | $\Sigma( F_o  -  F_c ) / \Sigma  F_o $                                                                                    |          |
| [ $F_o > 4\sigma(F_o)$ ; N=7683]: |                                                                                                                           | = 0.0418 |
| [all reflctns; N=7744]:           |                                                                                                                           | = 0.0420 |
| wR2:                              | $[\Sigma w(F_o^2 - F_c^2)^2 / \Sigma w(F_o^2)^2]^{1/2}$                                                                   |          |
| [ $F_o > 4\sigma(F_o)$ ; N=7683]: |                                                                                                                           | = 0.1121 |
| [all reflctns; N=7744]:           |                                                                                                                           | = 0.1124 |
| Goodness of fit:                  | $[\Sigma w(F_o^2 - F_c^2)^2 / (\text{NO-NV})]^{1/2}$                                                                      | = 1.050  |
| Flack's Parameter :               | $x = 0.03(5)$                                                                                                             |          |
| Remarks:                          | Refinement expression $\Sigma w(F_o^2 - F_c^2)^2$<br>The correct enantiomer is proved by Flack's Parameter.               |          |

## 5. References

- [1] a) C. G. Espino, K. W. Fiori, M. Kim, J. Du Bois, *J. Am. Chem. Soc.* **2004**, *126*, 15378-15379; b) K. W. Fiori, J. Du Bois, *J. Am. Chem. Soc.* **2007**, *129*, 562-568.
- [2] E. Díez-Barra, J. C. García-Martínez, S. Merino, R. del Rey, J. Rodríguez-López, P. Sánchez-Verdú, J. Tejada, *J. Org. Chem.* **2001**, *66*, 5664-5670.
- [3] P. Fackler, C. Berthold, F. Voss, T. Bach, *J. Am. Chem. Soc.* **2010**, *132*, 15911-15913.
- [4] M. E. Hart, K. L. Suchland, M. Miyakawa, J. R. Bunzow, D. K. Grandy, T. S. Scanlan, *J. Med. Chem.* **2006**, *49*, 1101-1112.
- [5] a) O. A. El-Sayed, H. Y. Aboul-Enein, *Arch. Pharm. Pharm. Med. Chem.* **2001**, *334*, 117-120; b) I. Devi, B. Baruah, P. J. Bhuyan, *Synlett* **2006**, 2593-2596; c) O. Meth-Cohn, B. Narine, B. Tarnowski, *J. Chem. Soc., Perkin Trans. I* **1981**, 1520-1530.
- [6] K. K. Park, J. Y. Jung, *Heterocycles* **2005**, *65*, 2095-2105.

- [7] a) P. Shanmugan, *Monat. Chem.* **1976**, *107*, 259-269; b) For the preparation of the precursor 4-bromo-2-nitrobenzaldehyde see: J. H. Seo, G. D. Artman III, S. M. Weinreb, *J. Org. Chem.* **2006**, *71*, 8891-8900.
- [8] C. L. Diedrich, D. Haase, W. Saak, J. Christoffers, *Eur. J. Org. Chem.* **2008**, 1811-1816.
- [9] F. M. Piller, A. Metzger, M. A. Schade, B. A. Haag, A. Gavryushin, P. Knochel, *Chem. Eur. J.* **2009**, *15*, 7192-7202.
- [10] D. Albrecht, F. Vogt, T. Bach, *Chem. Eur. J.* **2010**, *16*, 4284-4296.
- [11] K. W. Fiori, J. Du Bois, *J. Am. Chem. Soc.* **2007**, *129*, 562-568.
- [12] APEX suite of crystallographic software. APEX 2 Version 2008.4. Bruker AXS Inc., Madison, Wisconsin, USA, **2008**.
- [13] SAINT, Version 7.56a and SADABS Version 2008/1. Bruker AXS Inc., Madison, Wisconsin, USA (2008).
- [14] L. J. Farrugia, "WinGX (Version 1.70.01 January 2005) ", *J. Appl. Cryst.* **1999**, *32*, 837-838.
- [15] A. Altomare, G. Cascarano, C. Giacovazzo, A. Guagliardi, M. C. Burla, G. Polidori, M. Camalli "SIR92", *J. Appl. Cryst.* **1994**, *27*, 435-436.
- [16] G. M. Sheldrick, "SHELXL-97", University of Göttingen, Göttingen, Germany, **1998**.
- [17] International Tables for Crystallography, Vol. C, Tables 6.1.1.4 (pp. 500-502), 4.2.6.8 (pp. 219-222), and 4.2.4.2 (pp. 193-199), Wilson, A. J. C., Ed., Kluwer Academic Publishers, Dordrecht, The Netherlands, **1992**.
- [18] Spek, A. L. "PLATON", A Multipurpose Crystallographic Tool, Utrecht University, Utrecht, The Netherlands, **2010**.
